# Supplementary material for: Parallel synthesis of oligonucleotides containing N-acyl amino-LNA and their therapeutic effects as anti-microRNAs
Source: Royal Society of Chemistry journal article supplement (doi:10.1039/d2ob01809h), 2022-01-01
Supplement: d2ob01809h1.pdf [file d2ob01809h1.pdf]

## Supporting Information

### Parallel Synthesis of Oligonucleotides Containing N-Acyl amino-LNA and Their Therapeutic Effects as Anti-microRNAs

Tomo Takegawa-Araki,<sup>a\*</sup> Kai Yasukawa, <sup>a</sup>Norihiko Iwazaki, <sup>a</sup>Hideto Maruyama, <sup>a</sup>Hiroyuki Furukawa, <sup>a</sup>Hiroaki Sawamoto <sup>a</sup>  
Satoshi Obika<sup>b</sup>

#### Contents

|                                                                                                                      |      |
|----------------------------------------------------------------------------------------------------------------------|------|
| <sup>1</sup> H, <sup>13</sup> C, <sup>31</sup> P-NMR and high resolution mass spectra of synthesized compounds ----- | p.1  |
| All sequence data (Table S1) -----                                                                                   | p.33 |
| RP-HPLC purification condition of oligonucleotides -----                                                             | p.35 |
| RP-HPLC analysis condition of oligonucleotides -----                                                                 | p.35 |
| HPLC charts of oligonucleotides -----                                                                                | p.35 |
| Mass charts of oligonucleotides -----                                                                                | p.49 |
| LCMS analysis condition of oligonucleotides -----                                                                    | p.64 |
| Examples of profiles of LC-MS analysis (Fig. S1) -----                                                               | p.65 |
| Representative UV melting curves (Fig. S2, Table S2, Fig. S3) -----                                                  | p.66 |

#### 1. <sup>1</sup>H, <sup>13</sup>C and <sup>31</sup>P-NMR spectra of synthesized compounds

##### 1-[(1R,3R,4R,7S)-1-[[bis(4-methoxyphenyl)-phenyl-methoxy]methyl]-7-hydroxy-5-(2,2,2-trifluoroacetyl)-2-oxa-5-azabicyclo[2.2.1]heptan-3-yl]-5-methyl-pyrimidine-2,4-dione (T-2a)

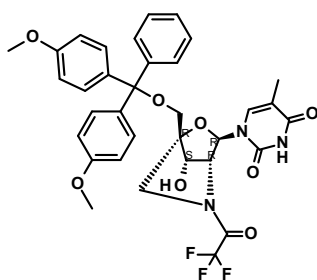

<sup>1</sup>H NMR (400 MHz, CHLOROFORM-d) of T-2a

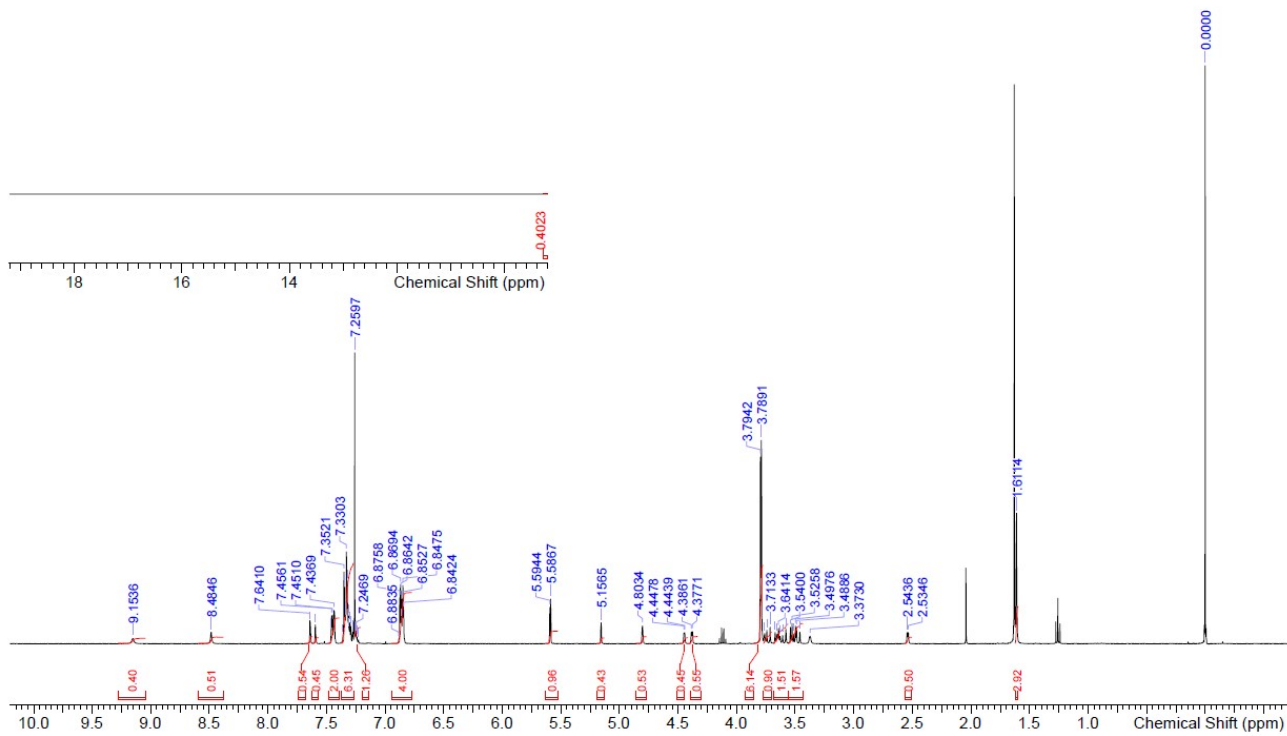

<sup>13</sup>C NMR (101 MHz, CHLOROFORM-d) of T-2a

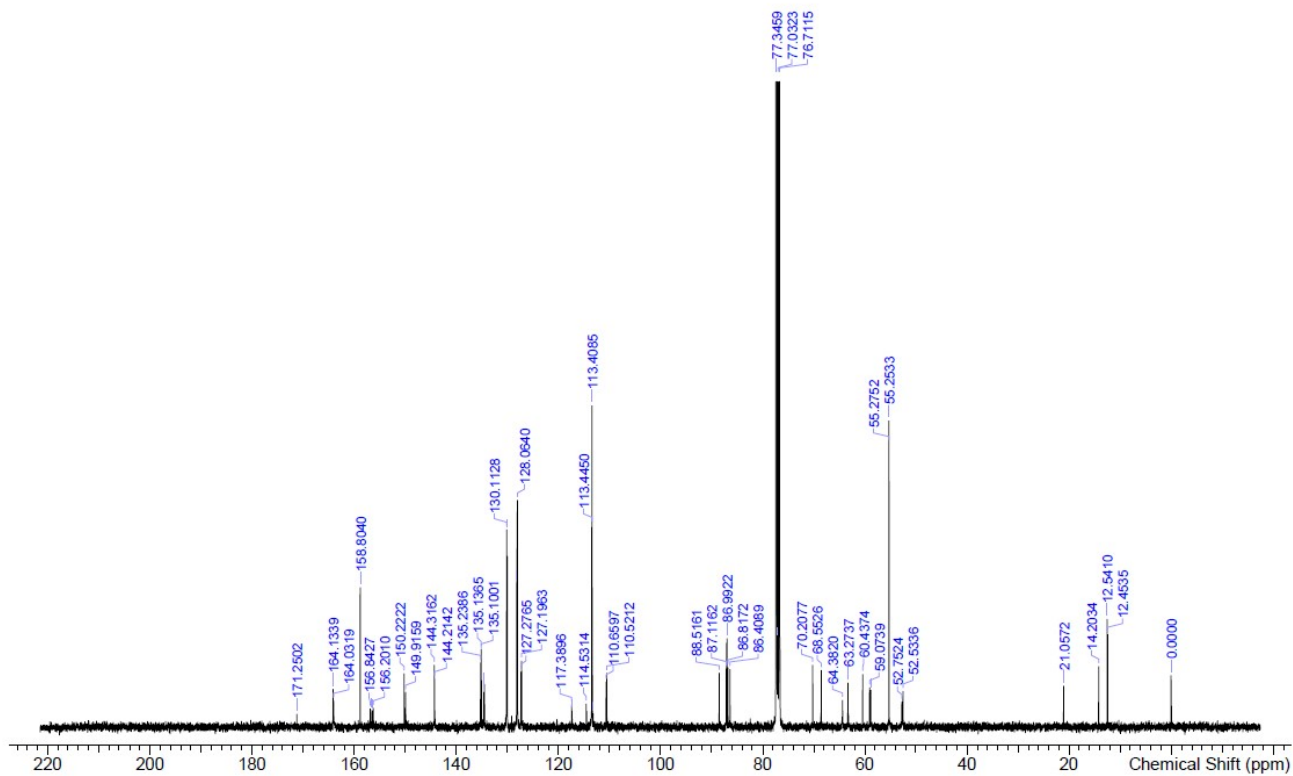

High resolution mass spectra of T-2a

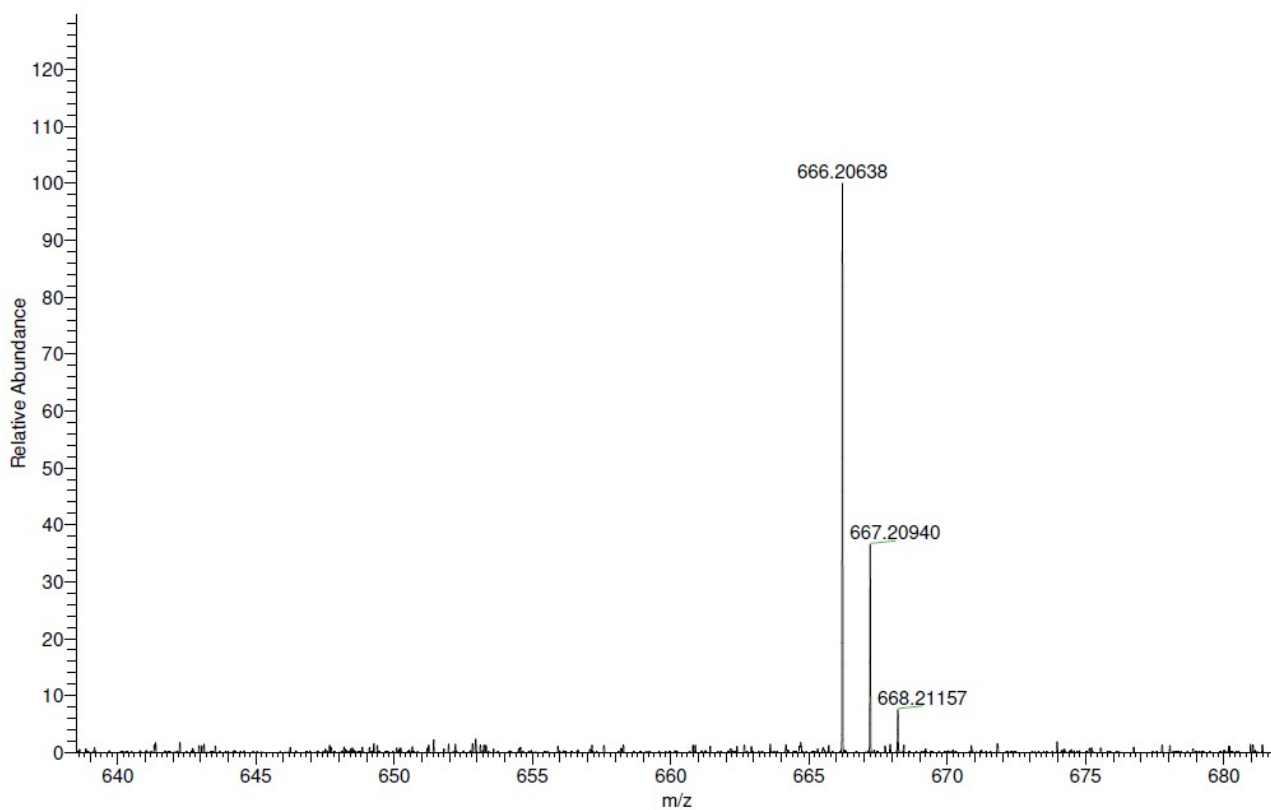

Elemental composition search on mass 666.20638

m/z= 661.20638-671.20638

| m/z       | Theo. Mass | Delta (ppm) | RDB equiv. | Composition                                                                  |
|-----------|------------|-------------|------------|------------------------------------------------------------------------------|
| 666.20638 | 666.20687  | -0.74       | 19.5       | C <sub>34</sub> H <sub>31</sub> O <sub>8</sub> N <sub>3</sub> F <sub>3</sub> |

**N-[9-[(1R,3R,4R,7S)-1-[[bis(4-methoxyphenyl)-phenyl-methoxy]methyl]-7-hydroxy-5-(2,2,2-trifluoroacetyl)-2-oxa-5-azabicyclo[2.2.1]heptan-3-yl]purin-6-yl]benzamide (A<sup>bz</sup>-2a)**

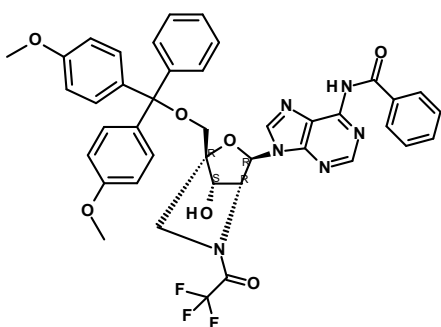

<sup>1</sup>H NMR (400 MHz, CHLOROFORM-d) of A<sup>bz</sup>-2a

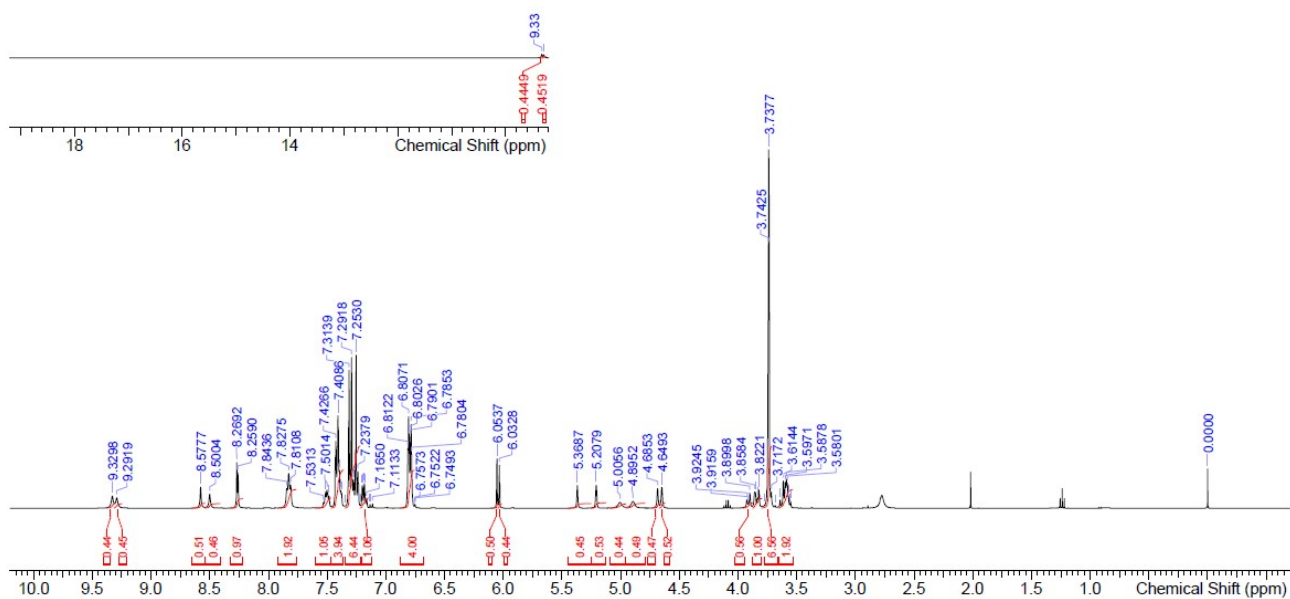

<sup>13</sup>C NMR (101 MHz, CHLOROFORM-d) of **A<sup>bz</sup>-2a**

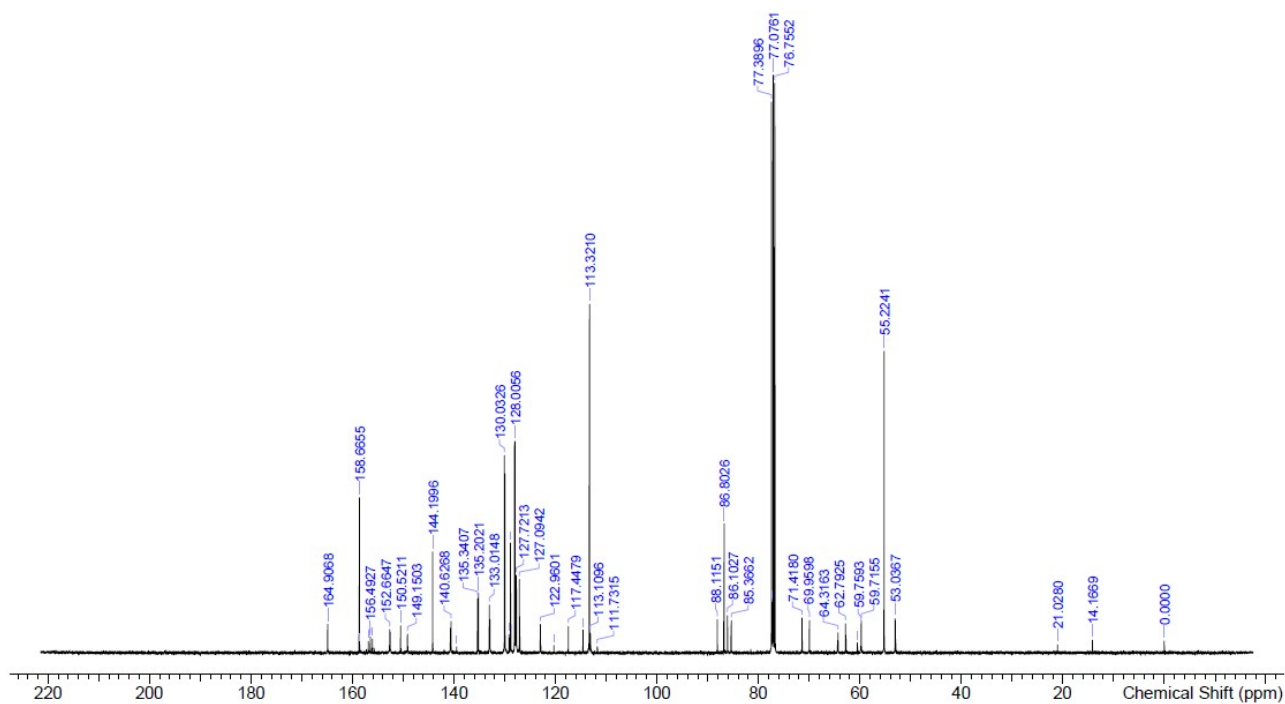

High resolution mass spectra of **A<sup>bz</sup>-2a**

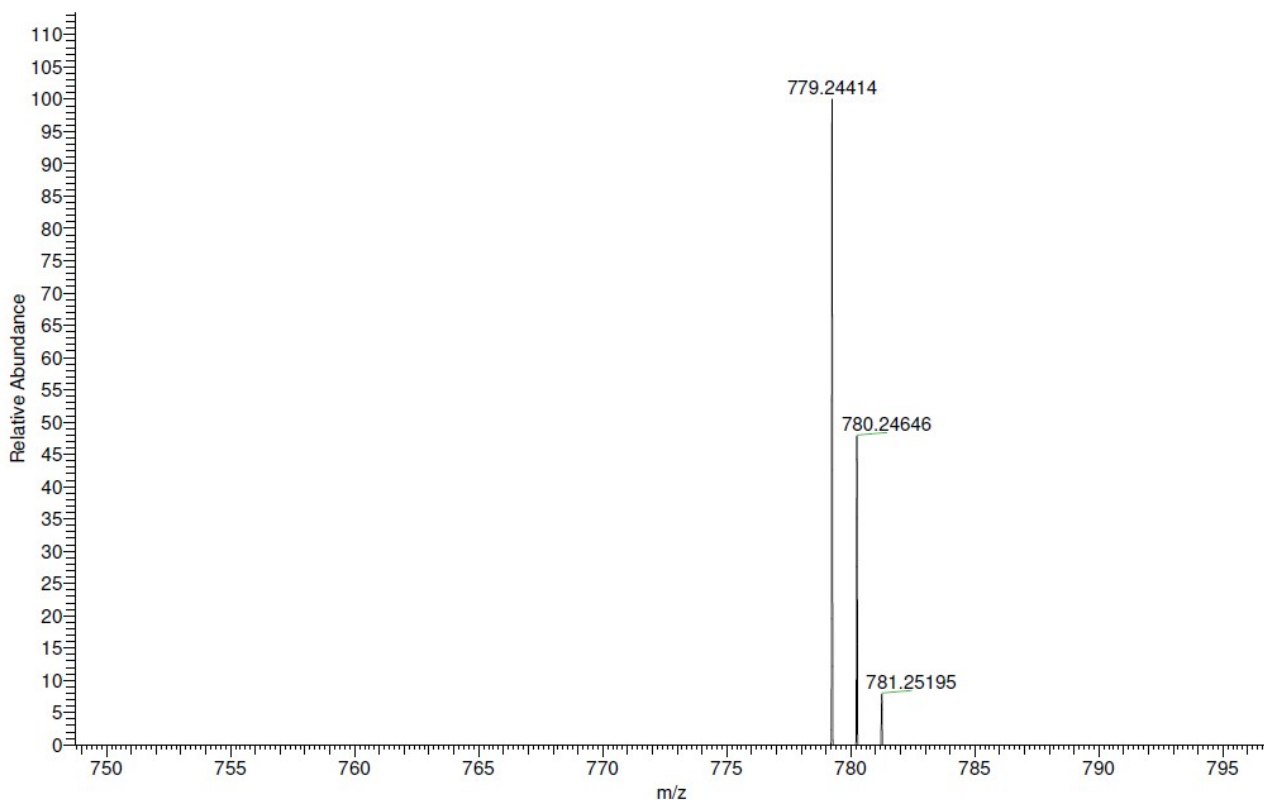

Elemental composition search on mass 779.24414

m/z= 774.24414-784.24414

| m/z       | Theo. Mass | Delta (ppm) | RDB equiv. | Composition                                                                  |
|-----------|------------|-------------|------------|------------------------------------------------------------------------------|
| 779.24414 | 779.24466  | -0.66       | 26.5       | C <sub>41</sub> H <sub>34</sub> O <sub>7</sub> N <sub>6</sub> F <sub>3</sub> |

**[9-[(1R,3R,4R,7S)-1-[[bis(4-methoxyphenyl)-phenyl-methoxy]methyl]-7-hydroxy-5-(2,2,2-trifluoroacetyl)-2-oxa-5-azabicyclo[2.2.1]heptan-3-yl]-2-(2-methylpropanoylamino)purin-6-yl] N,N-diphenylcarbamate (G<sup>dpc</sup>, ibu-2a)**

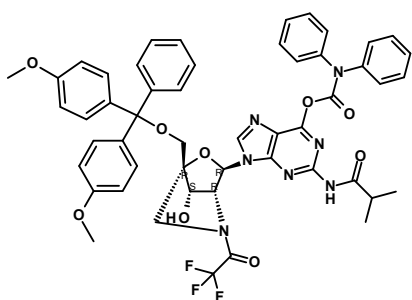

<sup>1</sup>H NMR (400 MHz, CHLOROFORM-d) of G<sup>dpc</sup>, ibu-2a

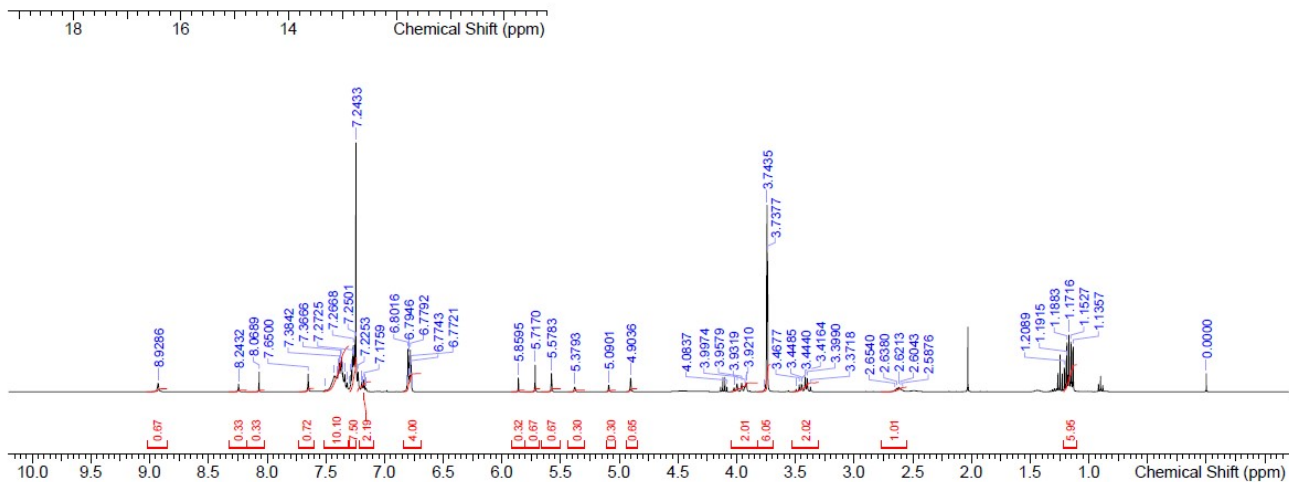

$^{13}\text{C}$  NMR (101 MHz, CHLOROFORM- $d$ ) of  $\text{G}^{\text{dpc}}, \text{ibu}_2\text{a}$

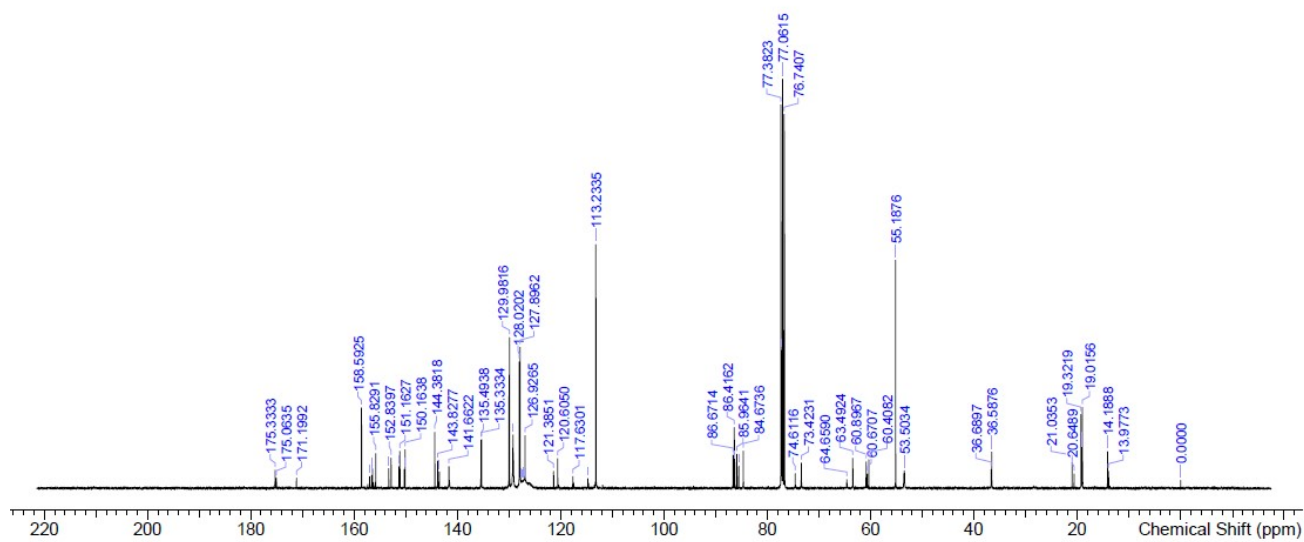

High resolution mass spectra of  $\text{G}^{\text{dpc}}, \text{ibu}_2\text{a}$

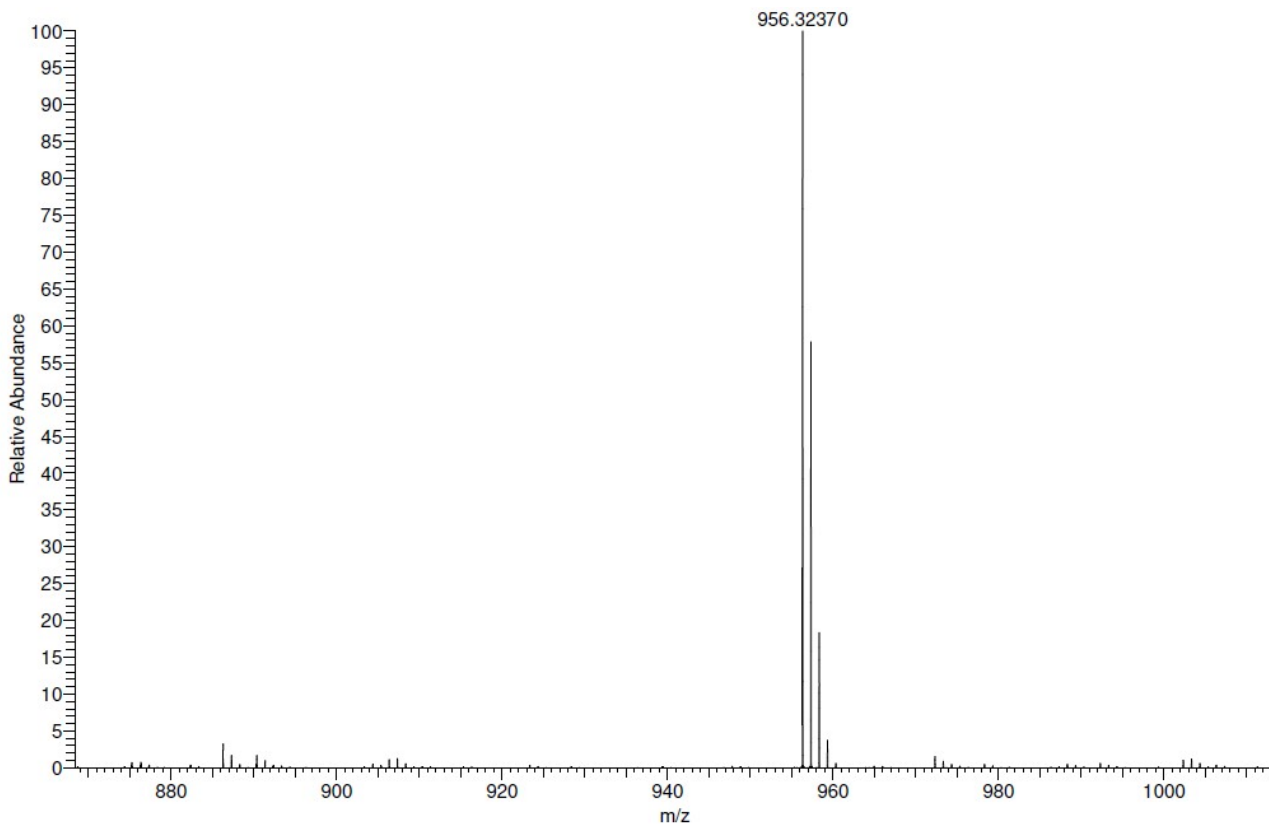

Elemental composition search on mass 956.32370

m/z = 951.32370–961.32370

| m/z       | Theo. Mass | Delta (ppm) | RDB equiv. | Composition                                                                  |
|-----------|------------|-------------|------------|------------------------------------------------------------------------------|
| 956.32370 | 956.32363  | 0.07        | 31.5       | C <sub>51</sub> H <sub>45</sub> O <sub>9</sub> N <sub>7</sub> F <sub>3</sub> |

**N-[1-[(1R,3R,4R,7S)-1-[[bis(4-methoxyphenyl)-phenyl-methoxy]methyl]-7-hydroxy-5-(2,2,2-trifluoroacetyl)-2-oxa-5-azabicyclo[2.2.1]heptan-3-yl]-5-methyl-2-oxo-pyrimidin-4-yl]benzamide (mC<sup>bz</sup>-2a)**

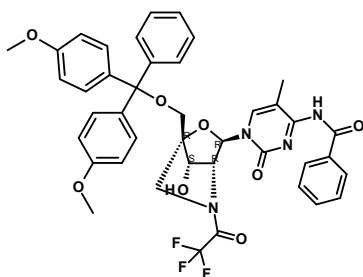

<sup>1</sup>H NMR (400 MHz, CHLOROFORM-d) of mC<sup>bz</sup>-2a

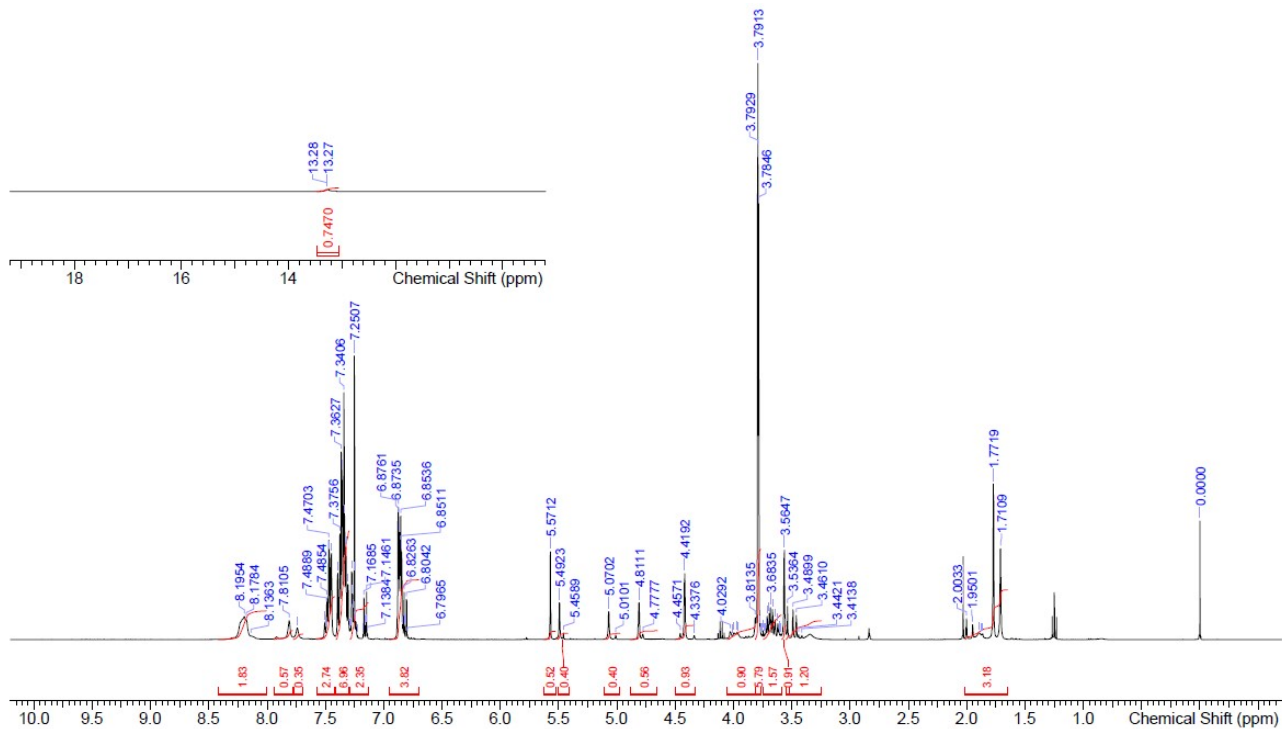

<sup>13</sup>C NMR (101 MHz, CHLOROFORM-d) of **mCbz-2a**

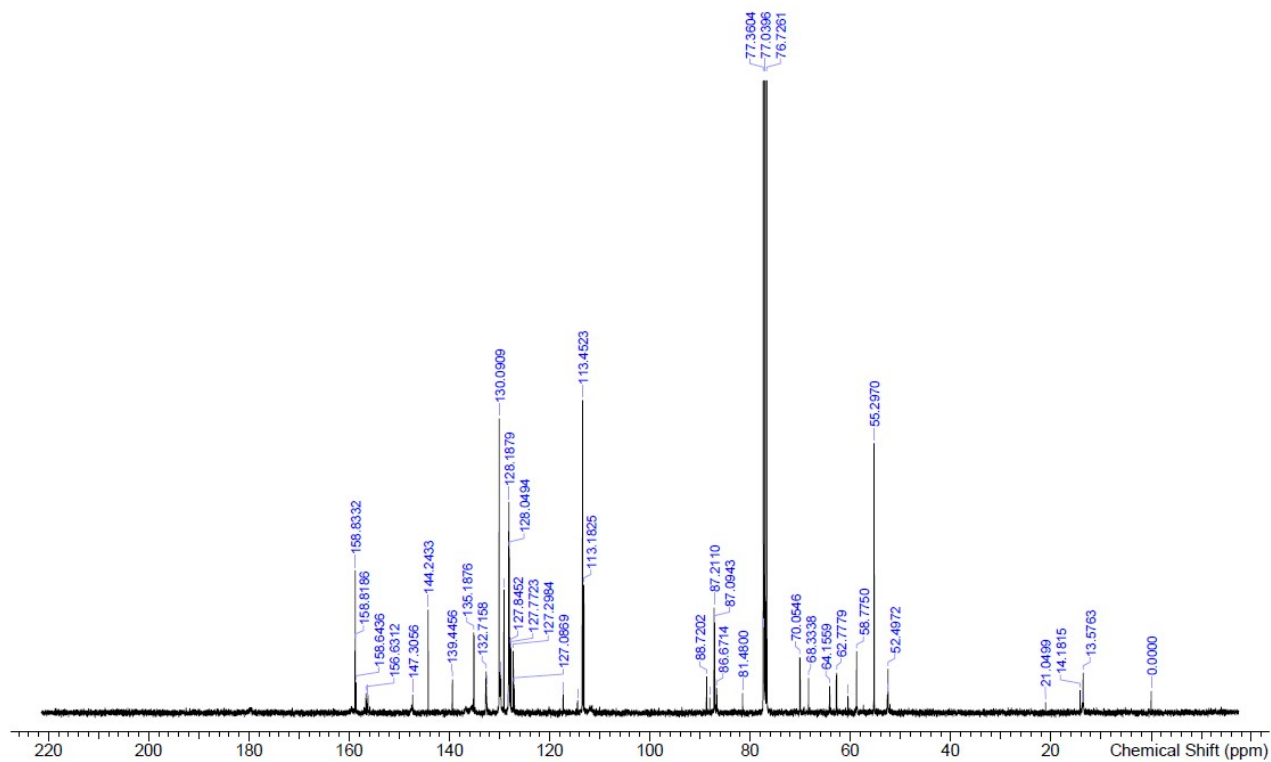

High resolution mass spectra of **mCbz-2a**



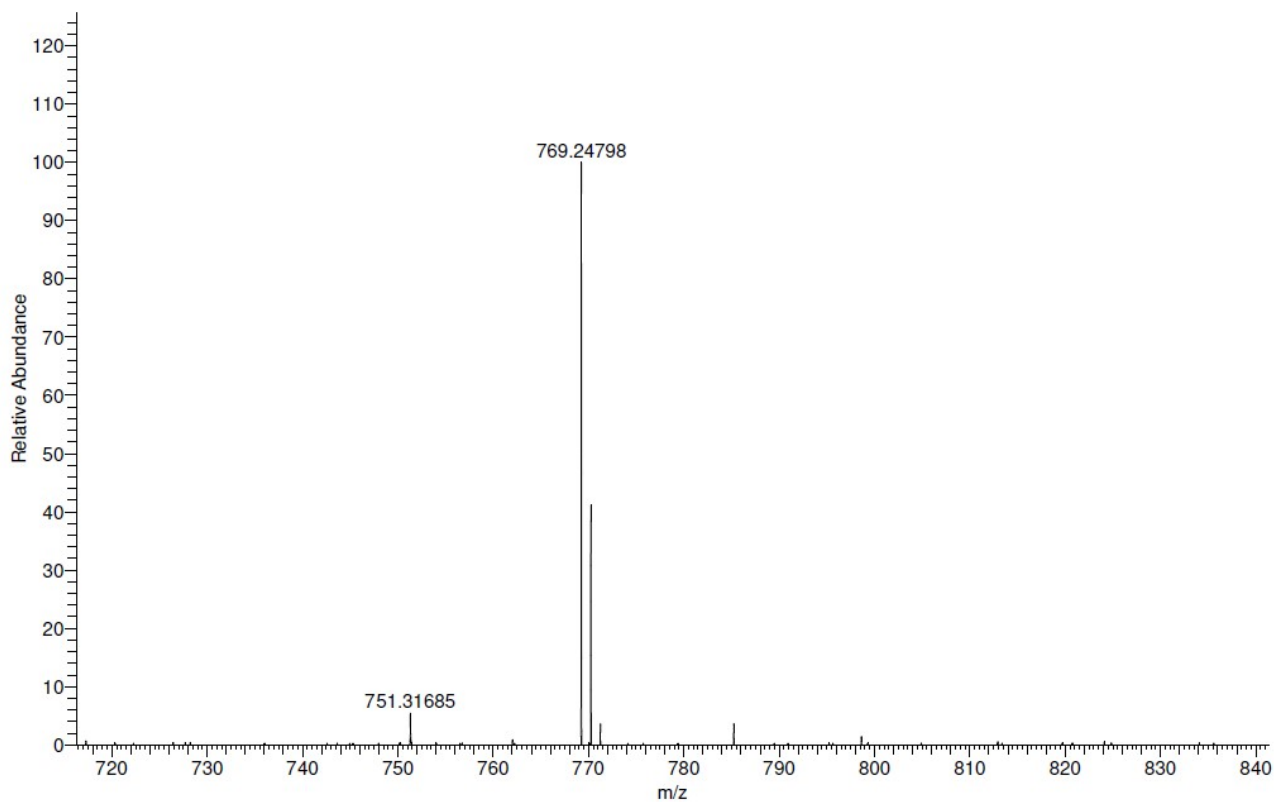

Elemental composition search on mass 769.24798

m/z = 764.24798-774.24798

| m/z       | Theo. Mass | Delta (ppm) | RDB equiv. | Composition                                                                  |
|-----------|------------|-------------|------------|------------------------------------------------------------------------------|
| 769.24798 | 769.24907  | -1.42       | 24.5       | C <sub>41</sub> H <sub>36</sub> O <sub>8</sub> N <sub>4</sub> F <sub>3</sub> |

**1-[[[(1R,3R,4R,7S)-1-[[bis(4-methoxyphenyl)-phenyl-methoxy]methyl]-7-hydroxy-5-methyl-2-oxa-5-azabicyclo[2.2.1]heptan-3-yl]-5-methyl-pyrimidine-2,4-dione (T-2b)**

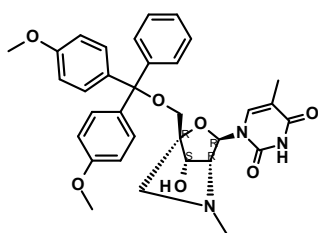

<sup>1</sup>H NMR (400 MHz, CHLOROFORM-d) of T-2b

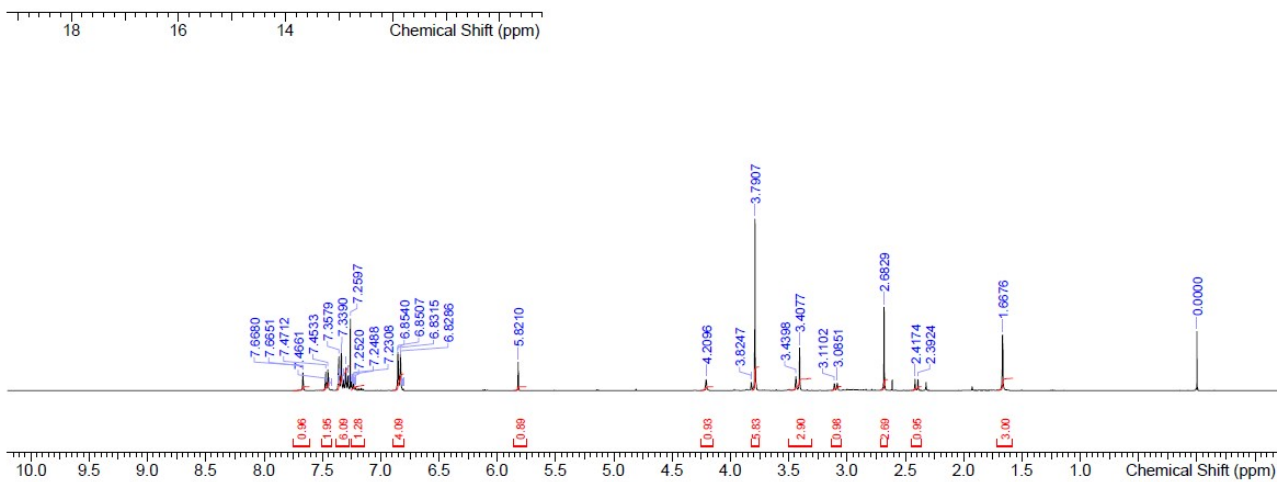

<sup>13</sup>C NMR (101 MHz, CHLOROFORM-d) of T-2b

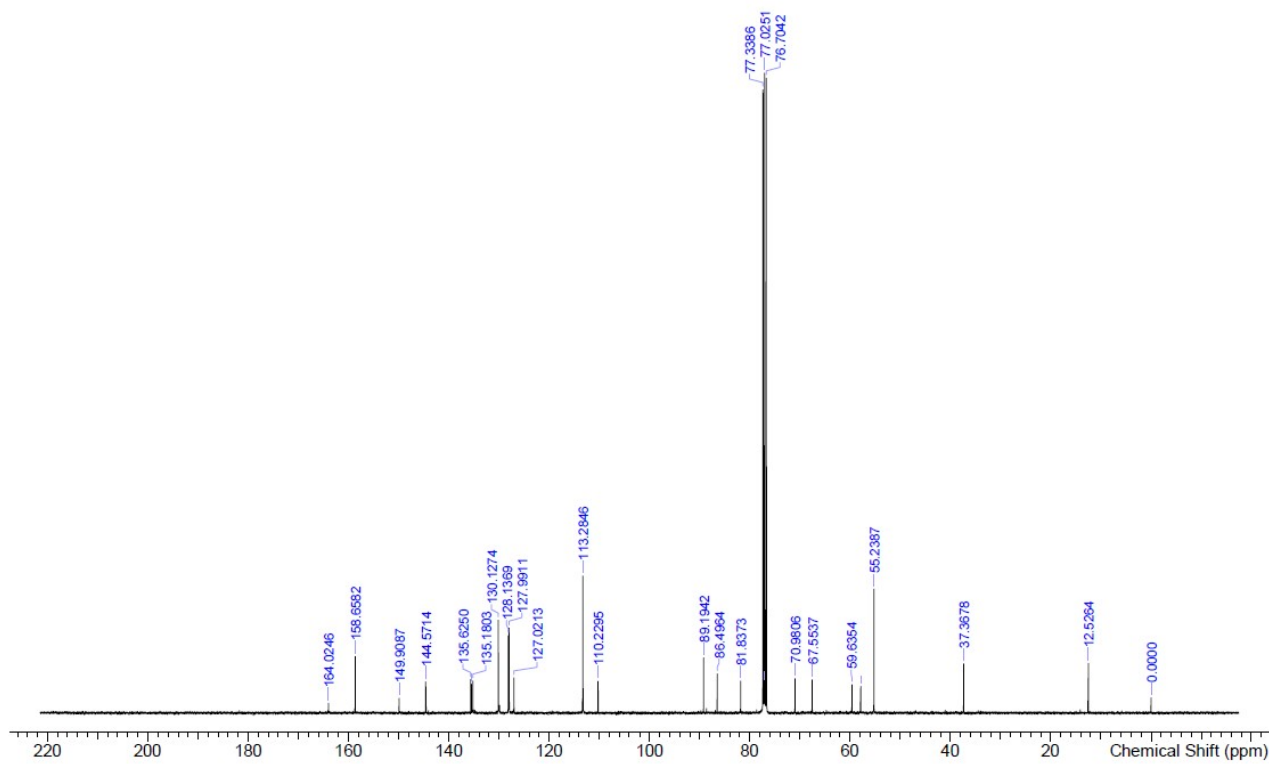

High resolution mass spectra of T-2b

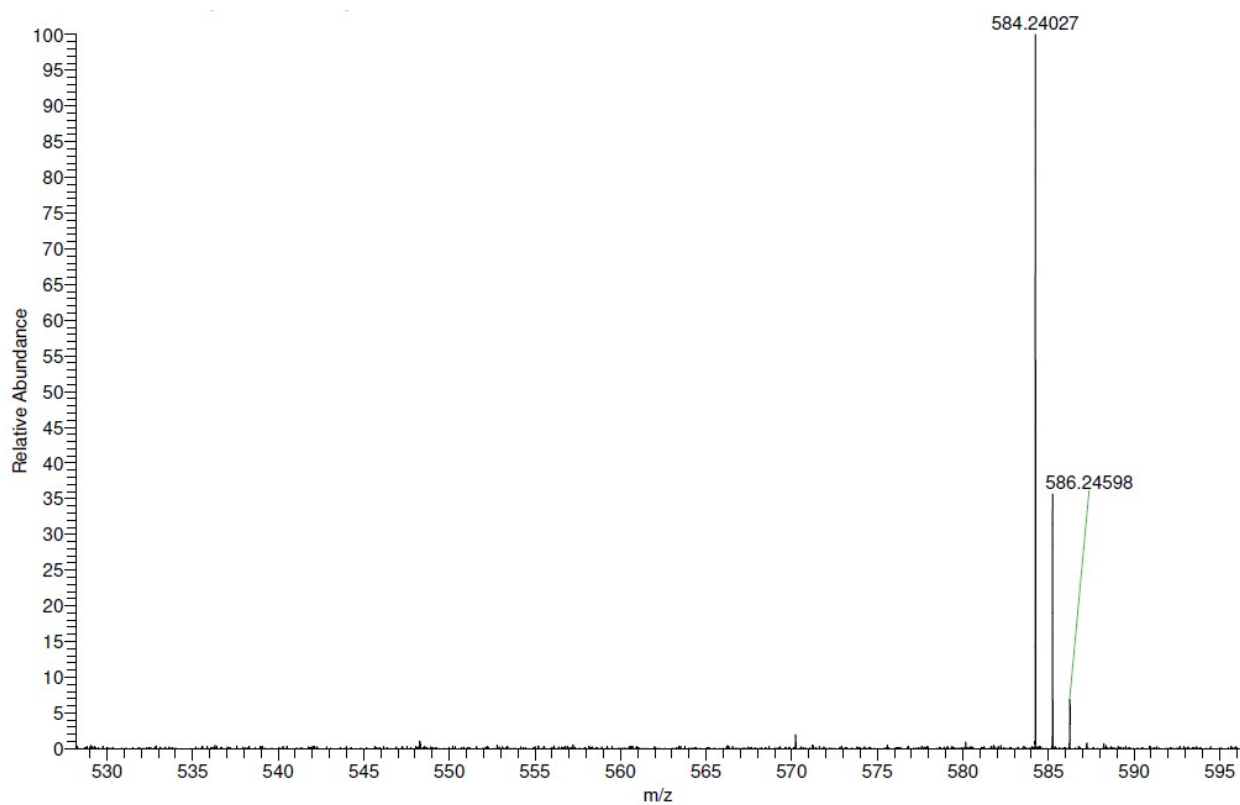

Elemental composition search on mass 584.24027

m/z = 579.24027–589.24027

| m/z       | Theo. Mass | Delta (ppm) | RDB equiv. | Composition                                                   |
|-----------|------------|-------------|------------|---------------------------------------------------------------|
| 584.24027 | 584.24022  | 0.08        | 18.5       | C <sub>33</sub> H <sub>34</sub> O <sub>7</sub> N <sub>3</sub> |

**N-[9-[(1R,3R,4R,7S)-1-[[bis(4-methoxyphenyl)-phenyl-methoxy]methyl]-7-hydroxy-5-methyl-2-oxa-5-azabicyclo[2.2.1]heptan-3-yl]purin-6-yl]benzamide (A<sup>bz</sup>-2b)**

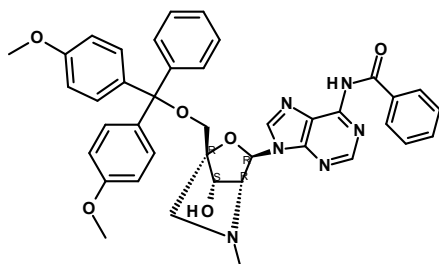

<sup>1</sup>H NMR (400 MHz, CHLOROFORM-d) of A<sup>bz</sup>-2b

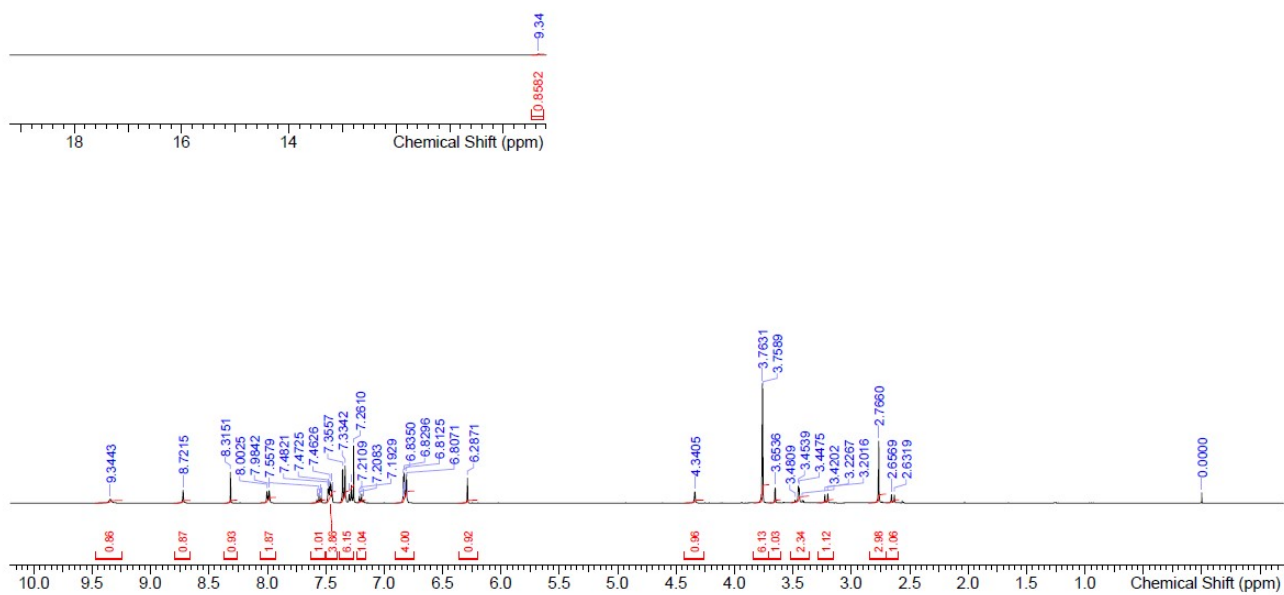

<sup>13</sup>C NMR (101 MHz, CHLOROFORM-d) of **A<sup>bz</sup>-2b**

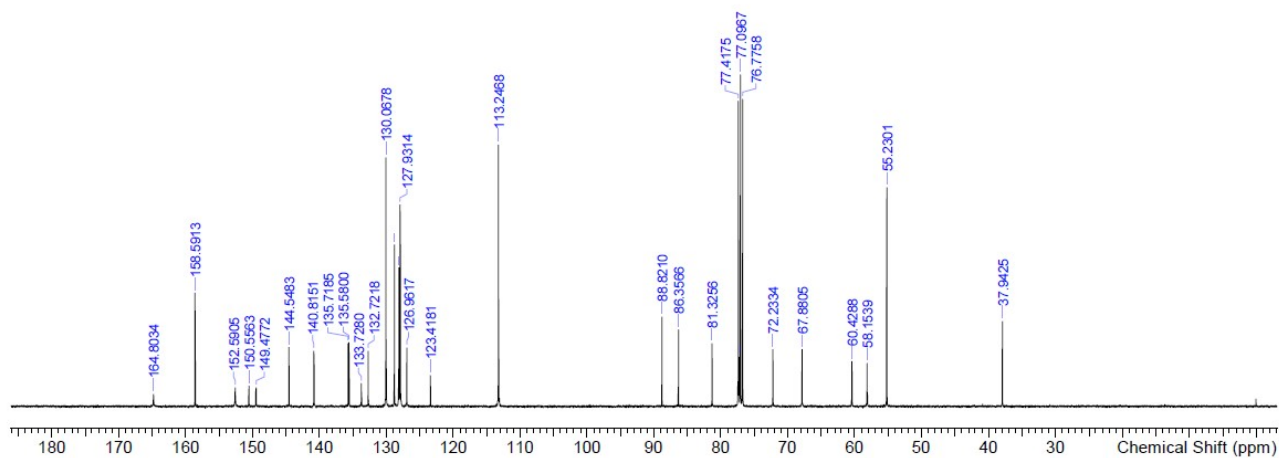

High resolution mass spectra of **A<sup>bz</sup>-2b**

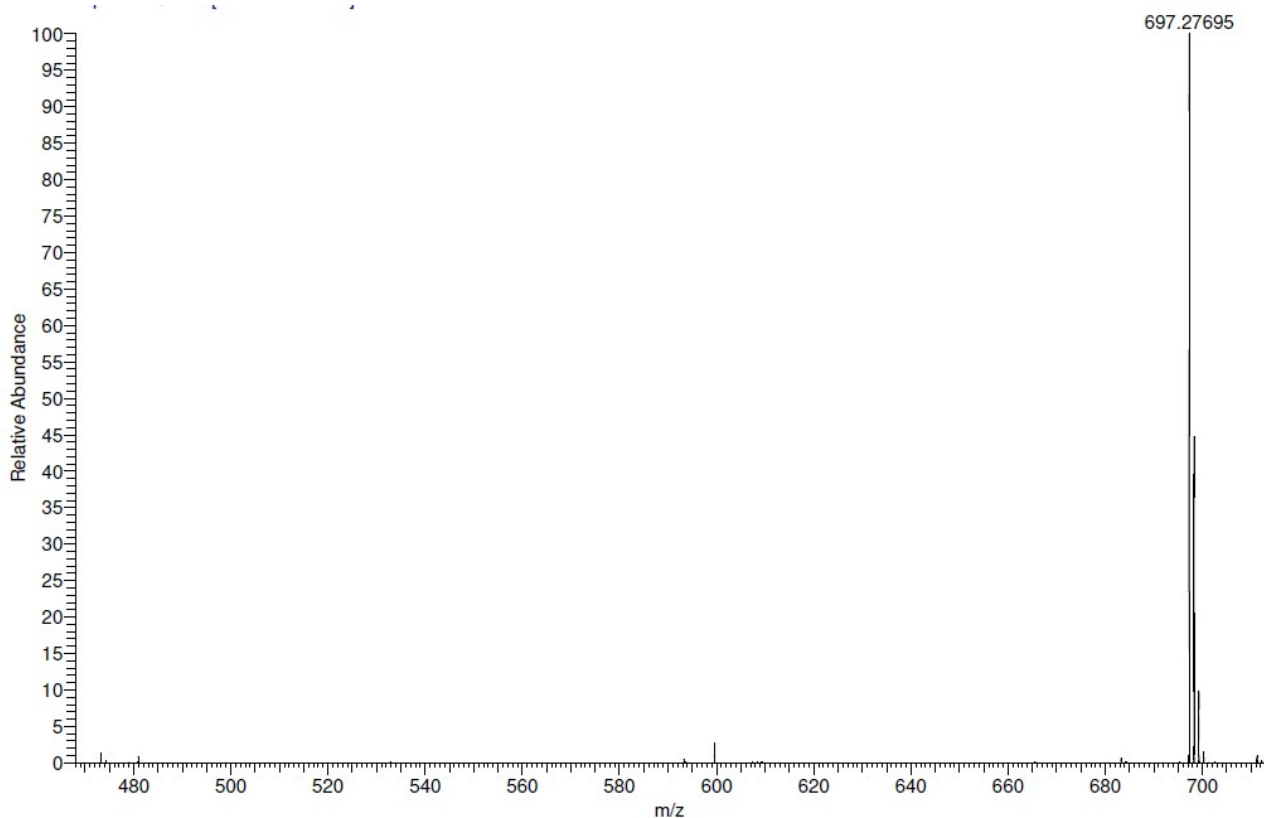

Elemental composition search on mass 697.27695

m/z= 692.27695-702.27695

| m/z       | Theo. Mass | Delta (ppm) | RDB equiv. | Composition                                                   |
|-----------|------------|-------------|------------|---------------------------------------------------------------|
| 697.27695 | 697.27801  | -1.51       | 25.5       | C <sub>40</sub> H <sub>37</sub> O <sub>6</sub> N <sub>6</sub> |

**[9-[(1R,3R,4R,7S)-1-[[bis(4-methoxyphenyl)-phenyl-methoxy]methyl]-7-hydroxy-5-methyl-2-oxa-5-azabicyclo[2.2.1]heptan-3-yl]-2-(2-methylpropanoylamino)purin-6-yl] N,N-diphenylcarbamate (G<sup>dpc</sup>, ibu-2b)**

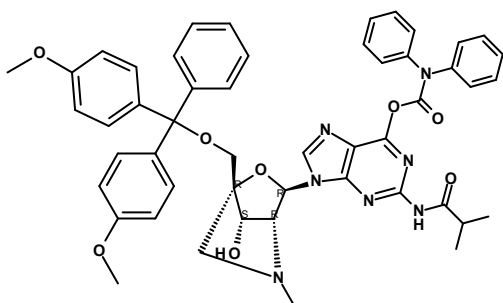

<sup>1</sup>H NMR (400 MHz, CHLOROFORM-d) of G<sup>dpc</sup>, ibu-2b

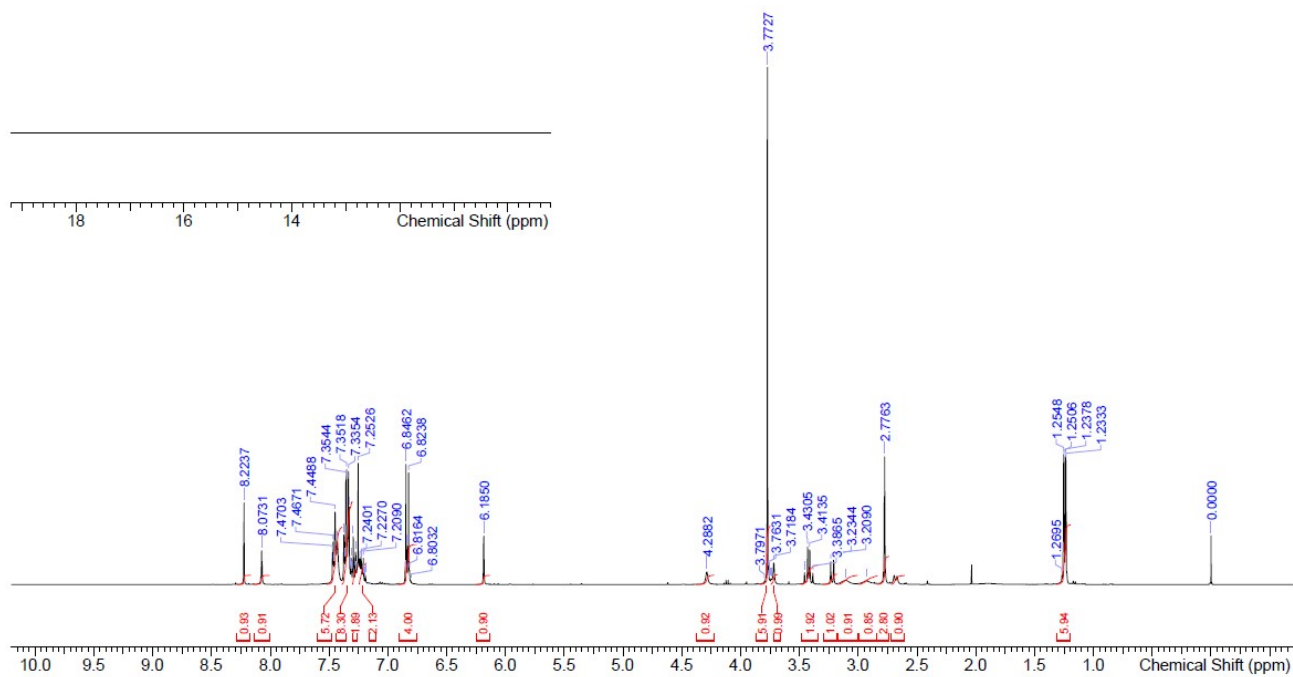

<sup>13</sup>C NMR (101 MHz, CHLOROFORM-d) of **G<sup>dpc</sup>, ibu-2b**

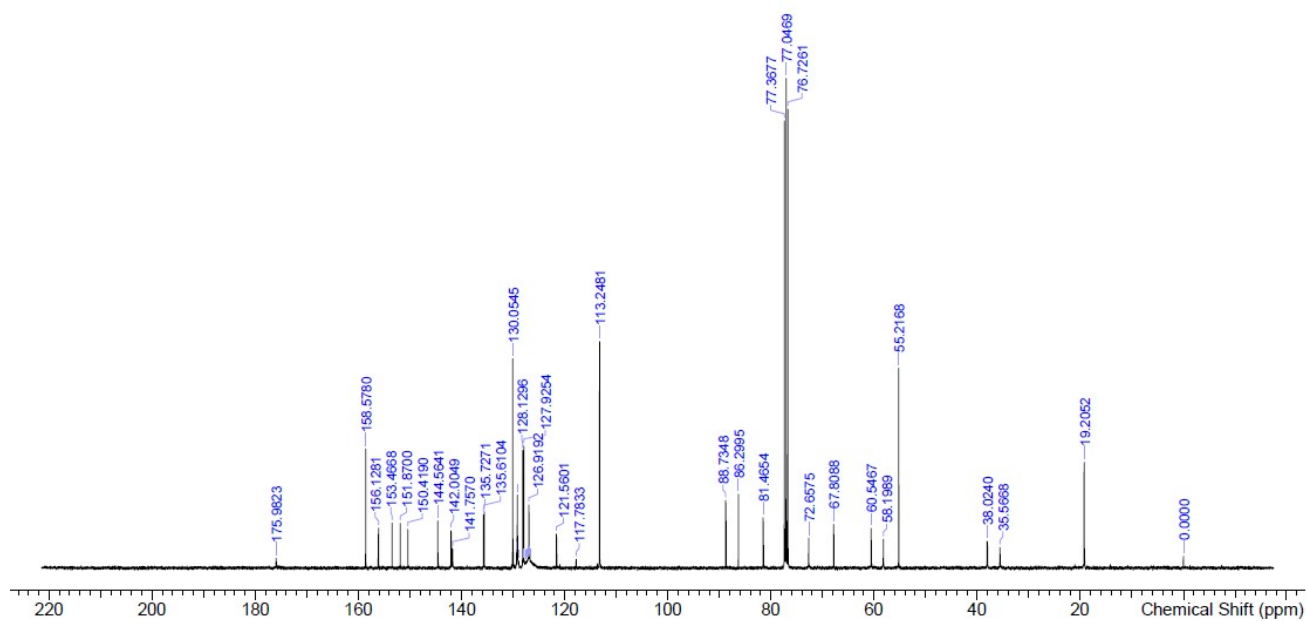

High resolution mass spectra of **G<sup>dpc</sup>, ibu-2b**

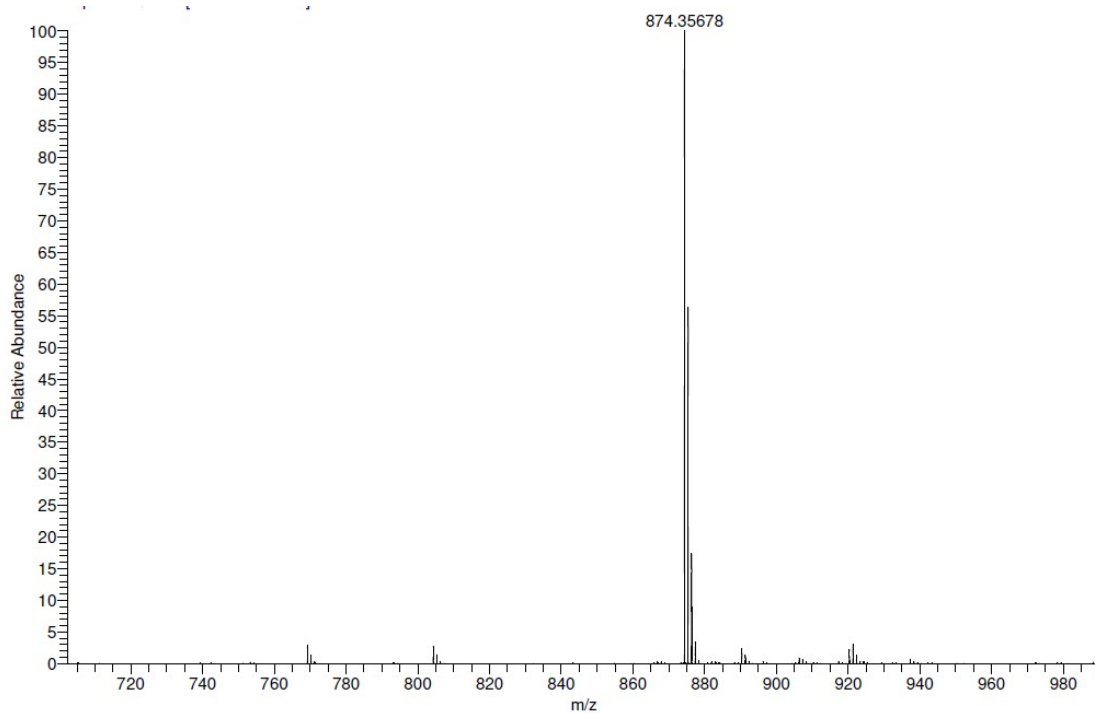

Elemental composition search on mass 874.35678

m/z = 869.35678-879.35678

| m/z       | Theo. Mass | Delta (ppm) | RDB equiv. | Composition                                                   |
|-----------|------------|-------------|------------|---------------------------------------------------------------|
| 874.35678 | 874.35698  | -0.23       | 30.5       | C <sub>50</sub> H <sub>48</sub> O <sub>8</sub> N <sub>7</sub> |

***N*-[1-[(1*R*,3*R*,4*R*,7*S*)-1-[[bis(4-methoxyphenyl)-phenyl-methoxy]methyl]-7-hydroxy-5-methyl-2-oxa-5-azabicyclo[2.2.1]heptan-3-yl]-5-methyl-2-oxo-pyrimidin-4-yl]benzamide (mC<sup>bz</sup>-2b)**

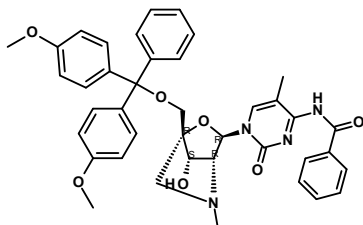

<sup>1</sup>H NMR (400 MHz, CHLOROFORM-d) of mC<sup>bz</sup>-2b

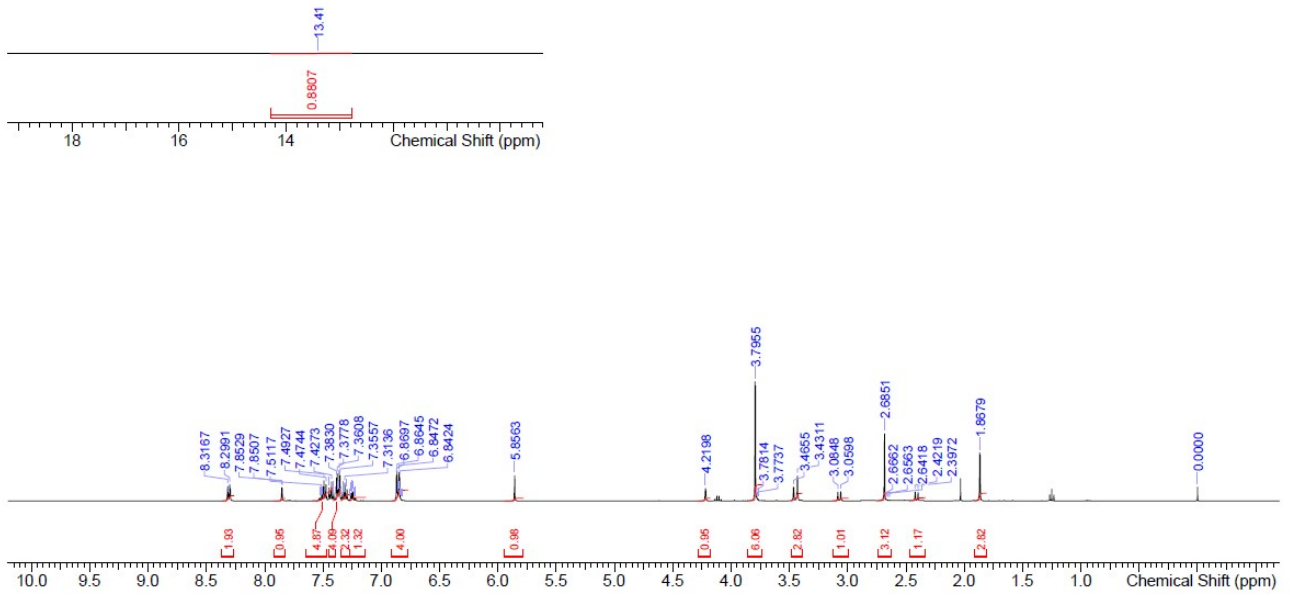

<sup>13</sup>C NMR (101 MHz, CHLOROFORM-d) of **mCbz-2b**

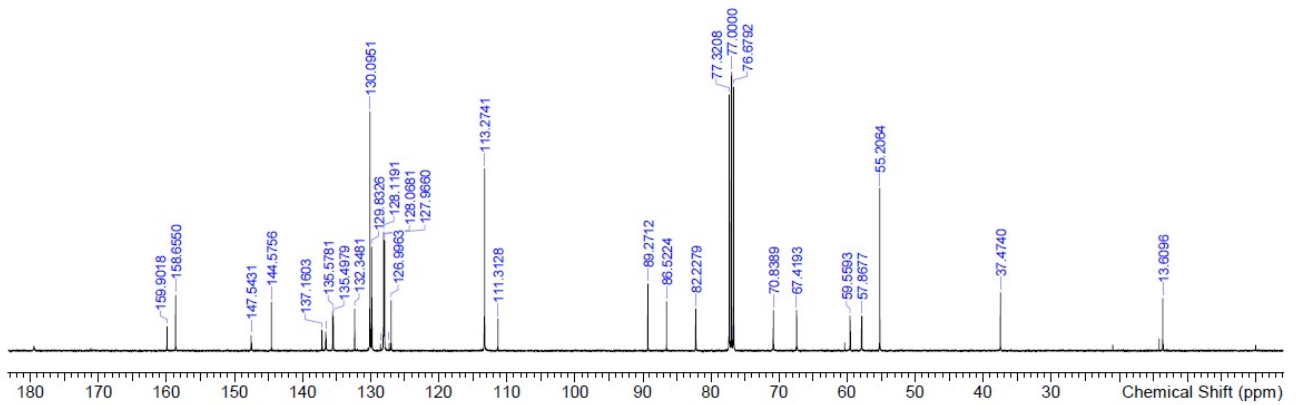

High resolution mass spectra of **mCbz-2b**



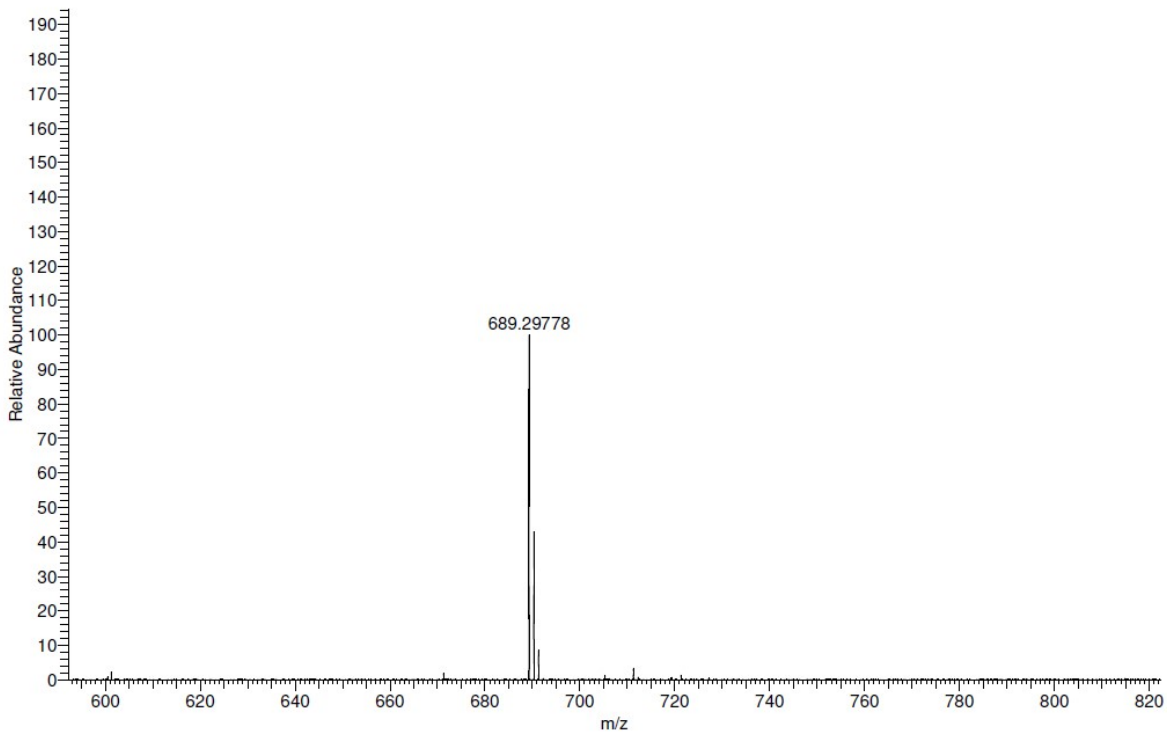

Elemental composition search on mass 689.29778

m/z= 684.29778–694.29778

| m/z       | Theo. Mass | Delta (ppm) | RDB equiv. | Composition                                                   |
|-----------|------------|-------------|------------|---------------------------------------------------------------|
| 689.29778 | 689.29698  | 1.17        | 22.5       | C <sub>40</sub> H <sub>41</sub> O <sub>7</sub> N <sub>4</sub> |

**3-[[[(1R,3R,4R,7S)-1-[[bis(4-methoxyphenyl)-phenyl-methoxy]methyl]-3-(5-methyl-2,4-dioxo-pyrimidin-1-yl)-5-(2,2,2-trifluoroacetyl)-2-oxa-5-azabicyclo[2.2.1]heptan-7-yl]oxy-(diisopropylamino)phosphanyl]oxypropanenitrile (T-3a)**

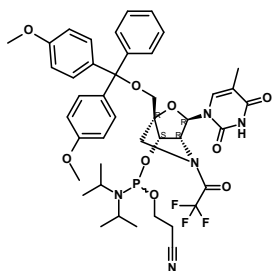

<sup>1</sup>H NMR (400 MHz, CHLOROFORM-d) of T-3a

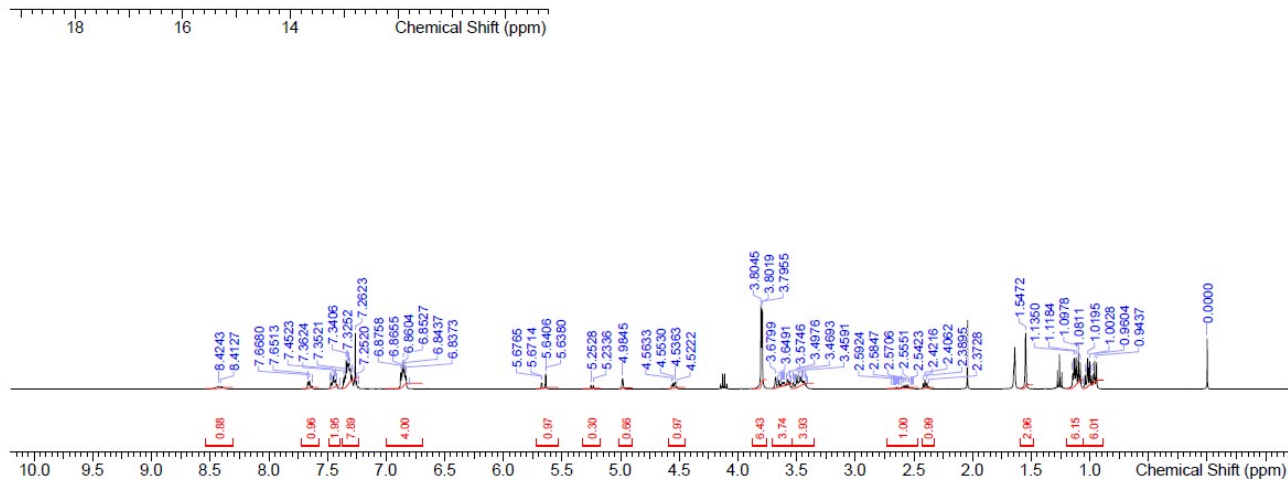

<sup>31</sup>P NMR (162 MHz, CHLOROFORM-d) of T-3a

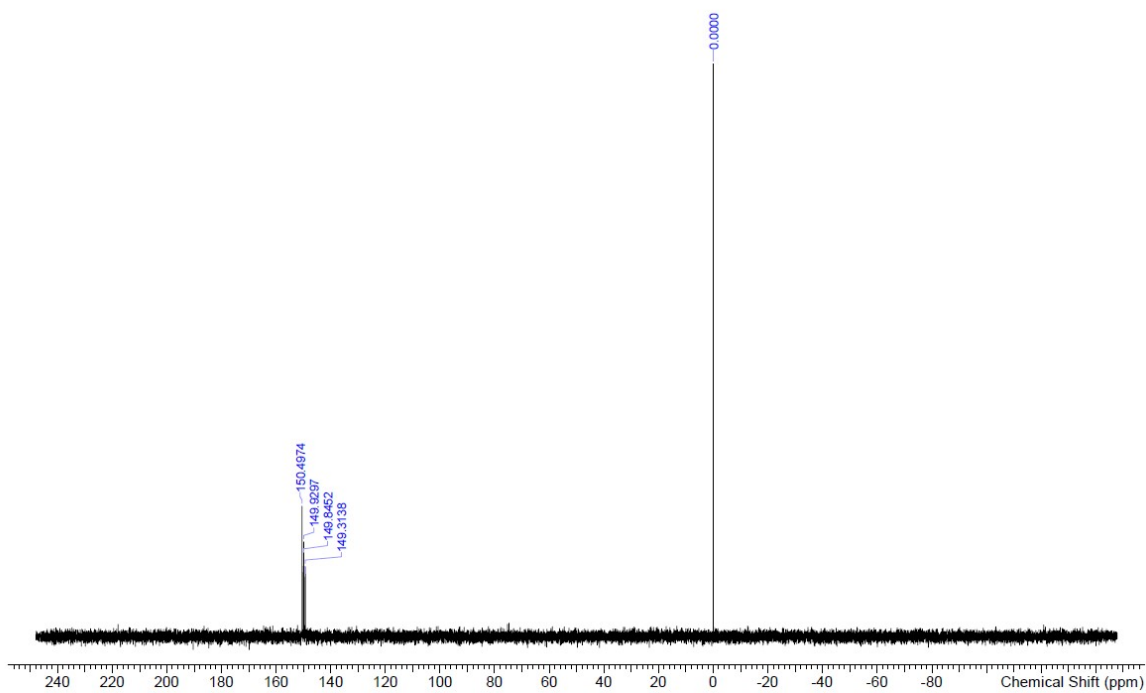

High resolution mass spectra of T-3a

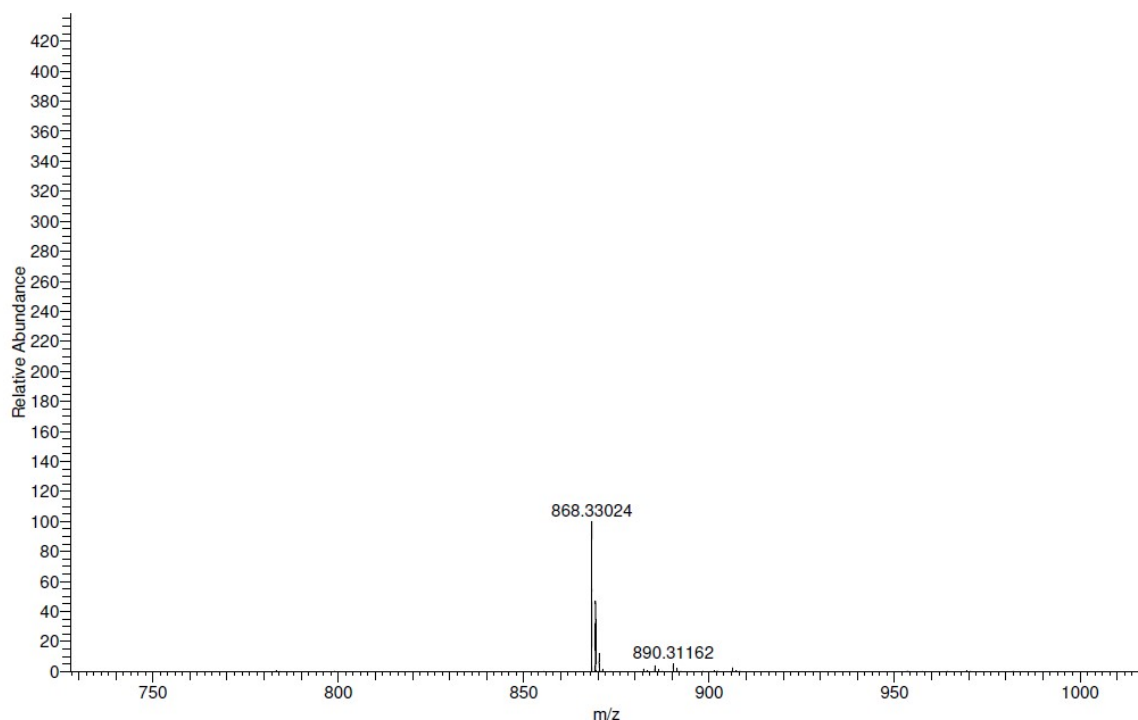

Elemental composition search on mass 868.33024

m/z= 863.33024–873.33024

| m/z       | Theo. Mass | Delta (ppm) | RDB equiv. | Composition                                                                    |
|-----------|------------|-------------|------------|--------------------------------------------------------------------------------|
| 868.33024 | 868.32928  | 1.11        | 20.5       | C <sub>43</sub> H <sub>50</sub> O <sub>9</sub> N <sub>5</sub> F <sub>3</sub> P |

***N*-[9-[(1*R*,3*R*,4*R*,7*S*)-1-[[bis(4-methoxyphenyl)-phenyl-methoxy]methyl]-7-[2-cyanoethoxy-(diisopropylamino)phosphanyl]oxy-5-(2,2,2-trifluoroacetyl)-2-oxa-5-azabicyclo[2.2.1]heptan-3-yl]purin-6-yl]benzamide (**A<sup>bz</sup>-3a**)**

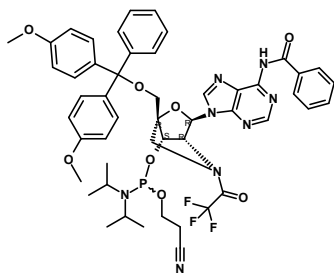

<sup>1</sup>H NMR (400 MHz, CHLOROFORM-*d*) of **A<sup>bz</sup>-3a**

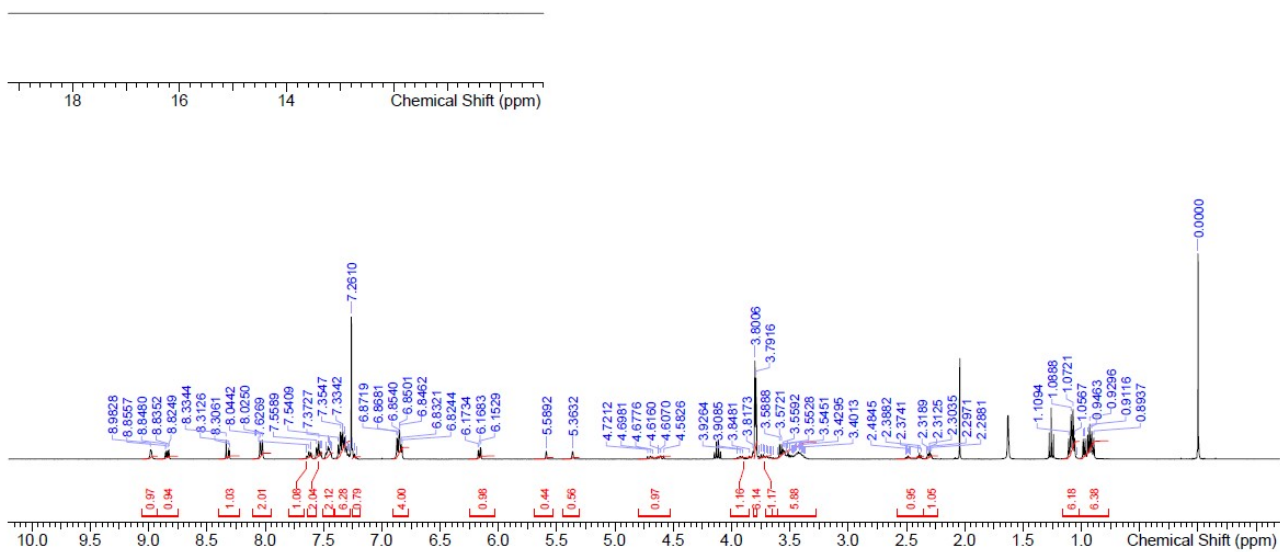

<sup>31</sup>P NMR (162 MHz, CHLOROFORM-d) of **A<sup>bz</sup>-3a**

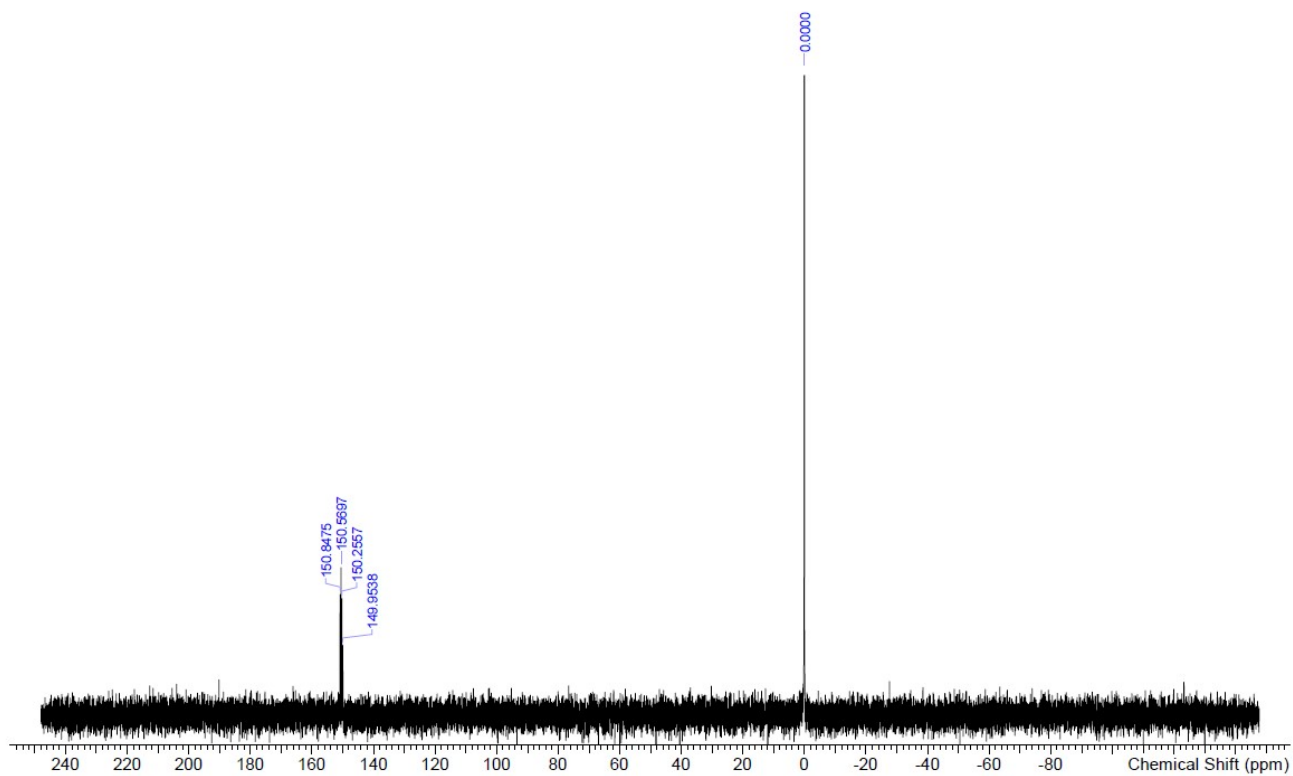

High resolution mass spectra of **A<sup>bz</sup>-3a**

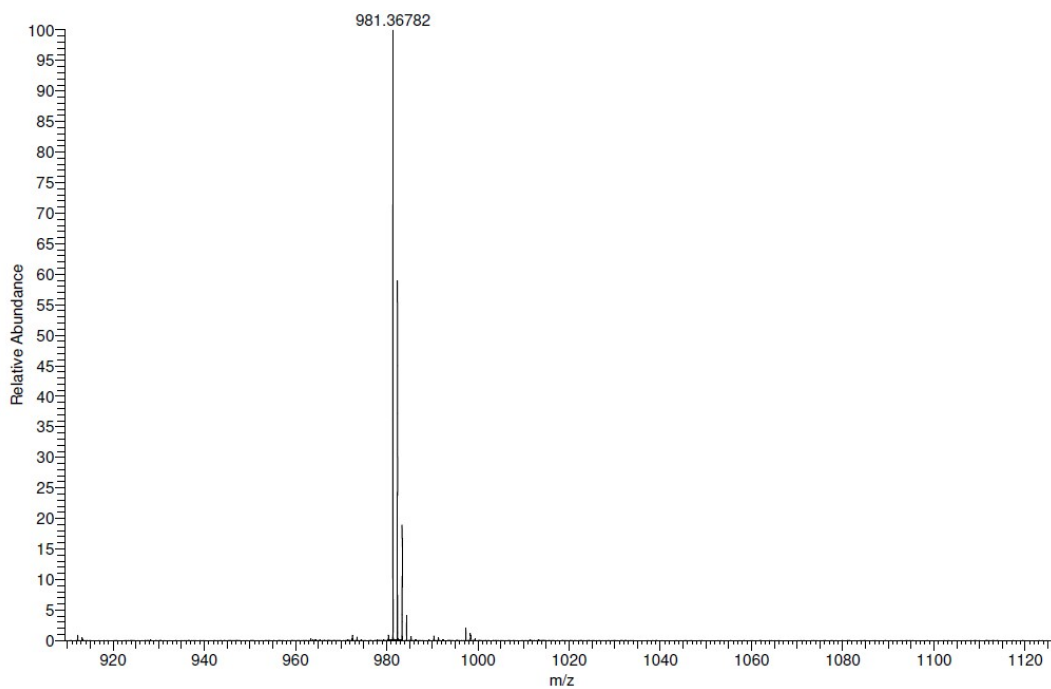

Elemental composition search on mass 981.36782

m/z = 976.36782-986.36782

| m/z       | Theo. Mass | Delta (ppm) | RDB equiv. | Composition                                                                    |
|-----------|------------|-------------|------------|--------------------------------------------------------------------------------|
| 981.36782 | 981.36706  | 0.78        | 27.5       | C <sub>50</sub> H <sub>53</sub> O <sub>8</sub> N <sub>8</sub> F <sub>3</sub> P |

**[9-[[1R,3R,4R,7S)-1-[[bis(4-methoxyphenyl)-phenyl-methoxy]methyl]-7-[2-cyanoethoxy-(diisopropylamino)phosphanyl]oxy-5-(2,2,2-trifluoroacetyl)-2-oxa-5-azabicyclo[2.2.1]heptan-3-yl]-2-(2-methylpropanoylamino)purin-6-yl] N,N-diphenylcarbamate (G<sup>dpc</sup>, ibu-3a)**

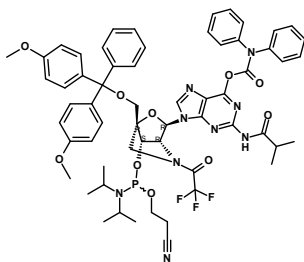

<sup>1</sup>H NMR (400 MHz, CHLOROFORM-d) of G<sup>dpc</sup>, ibu-3a

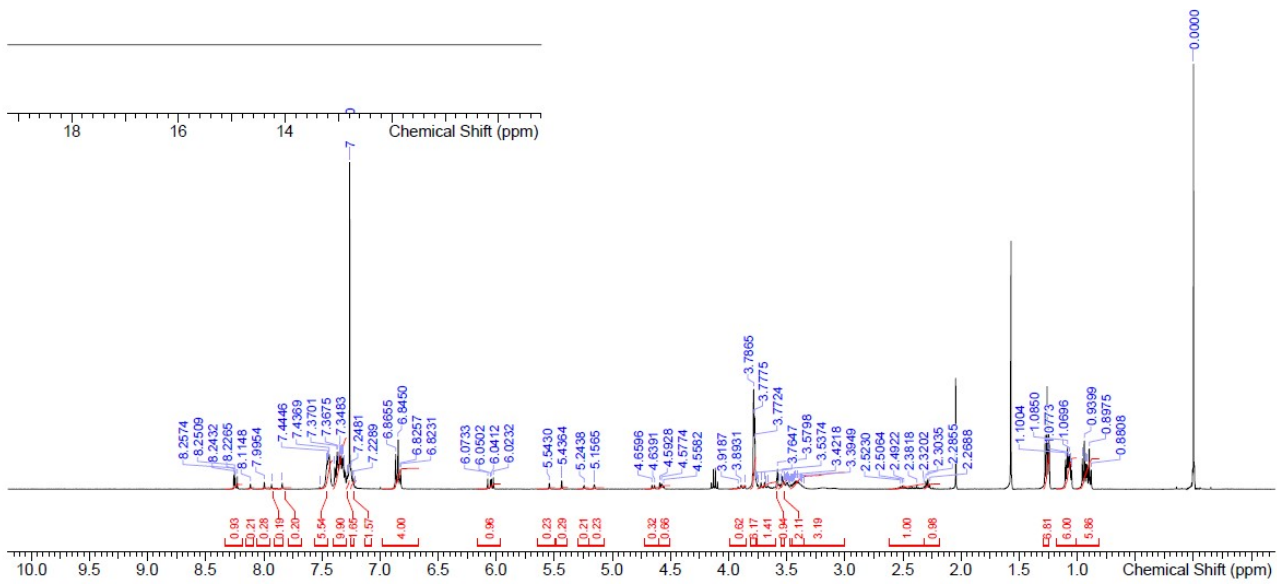

$^{31}\text{P}$  NMR (162 MHz, CHLOROFORM- $d$ ) of  $\text{G}^{\text{dpc}}, \text{ibu-3a}$

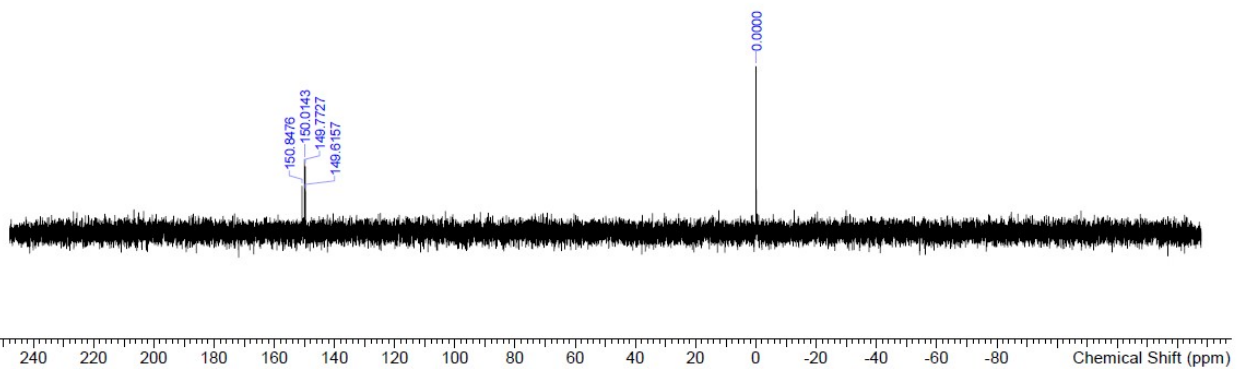

High resolution mass spectra of  $\text{G}^{\text{dpc}}, \text{ibu-3a}$

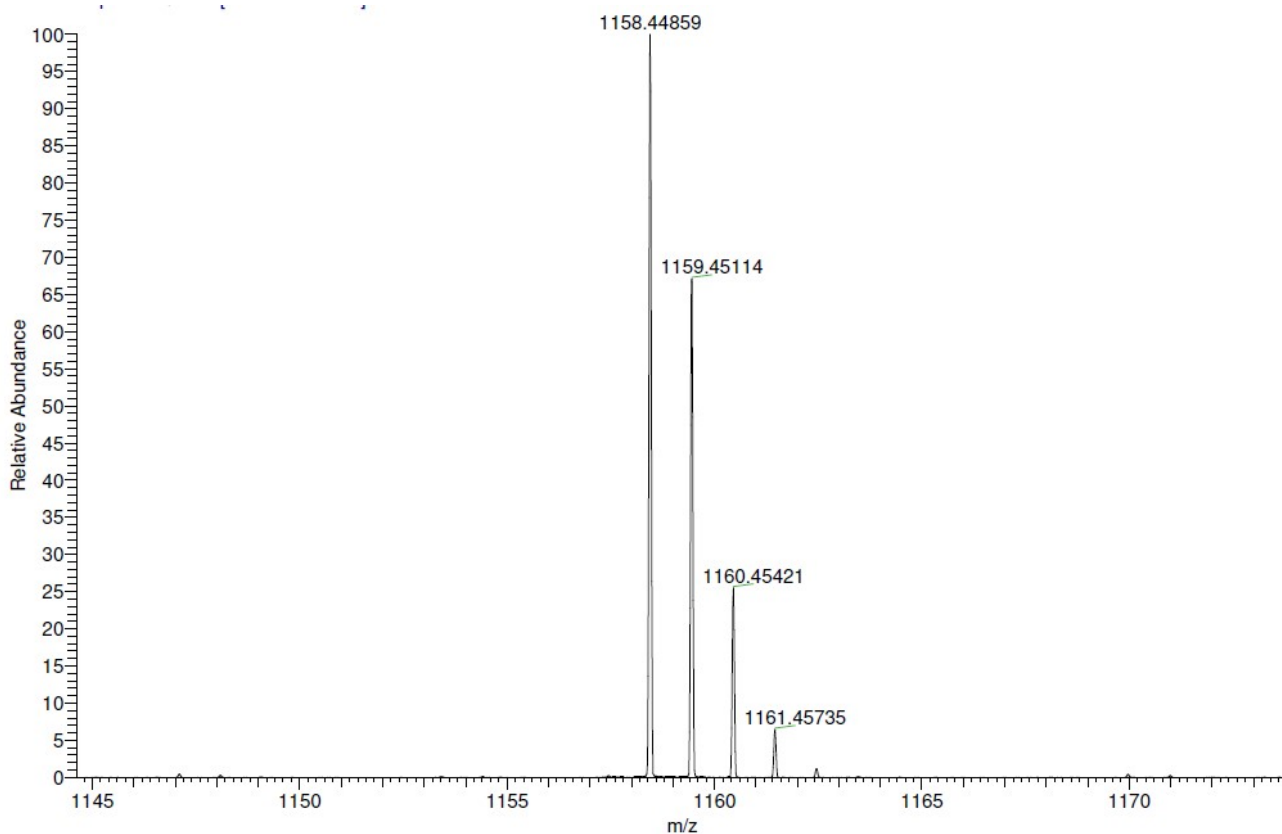

Elemental composition search on mass 1158.44859

m/z= 1153.44859–1163.44859

| m/z        | Theo. Mass | Delta (ppm) | RDB equiv. | Composition                                                                     |
|------------|------------|-------------|------------|---------------------------------------------------------------------------------|
| 1158.44859 | 1158.44604 | 2.20        | 32.5       | C <sub>60</sub> H <sub>64</sub> O <sub>10</sub> N <sub>9</sub> F <sub>3</sub> P |

**N-[1-[(1R,3R,4R,7S)-1-[[bis(4-methoxyphenyl)-phenyl-methoxy]methyl]-7-[2-cyanoethoxy-(diisopropylamino)phosphanyl]oxy-5-(2,2,2-trifluoroacetyl)-2-oxa-5-azabicyclo[2.2.1]heptan-3-yl]-5-methyl-2-oxo-pyrimidin-4-yl]benzamide (mC<sup>bz</sup>-3a)**

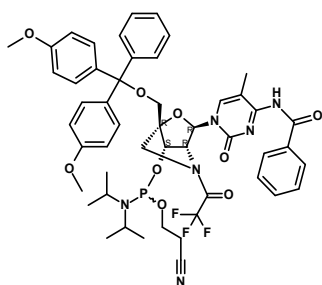

<sup>1</sup>H NMR (400 MHz, CHLOROFORM-d) of mC<sup>bz</sup>-3a

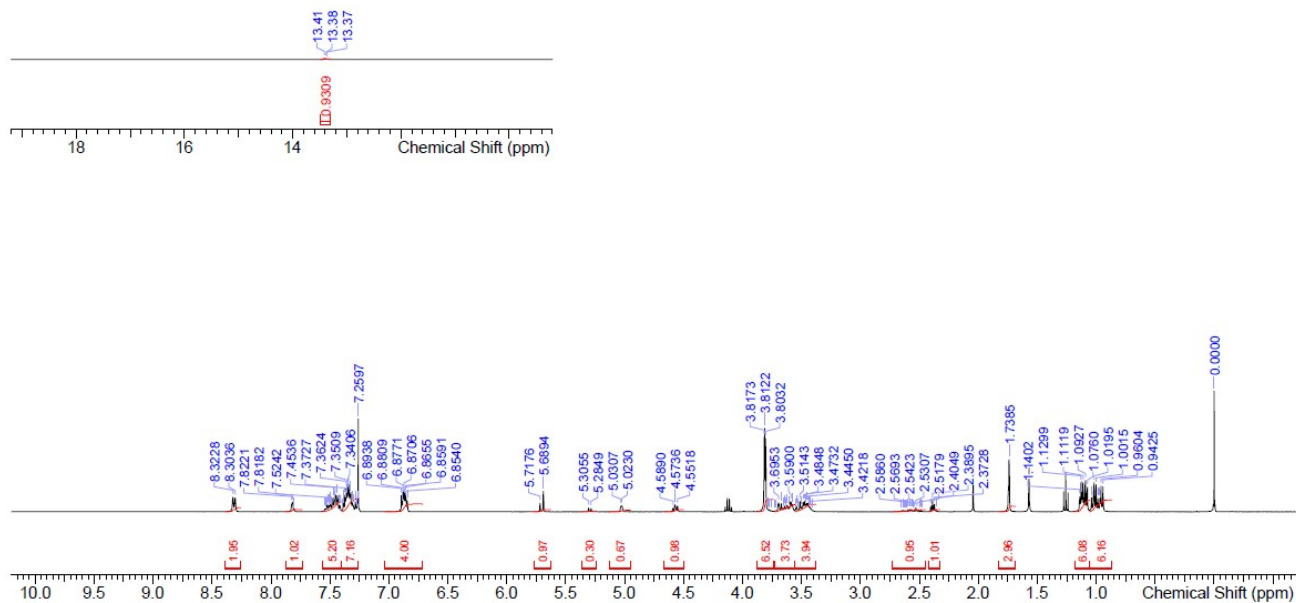

$^1\text{H}$  NMR (162 MHz, CHLOROFORM- $d$ ) of  $m\text{Cbz-3a}$

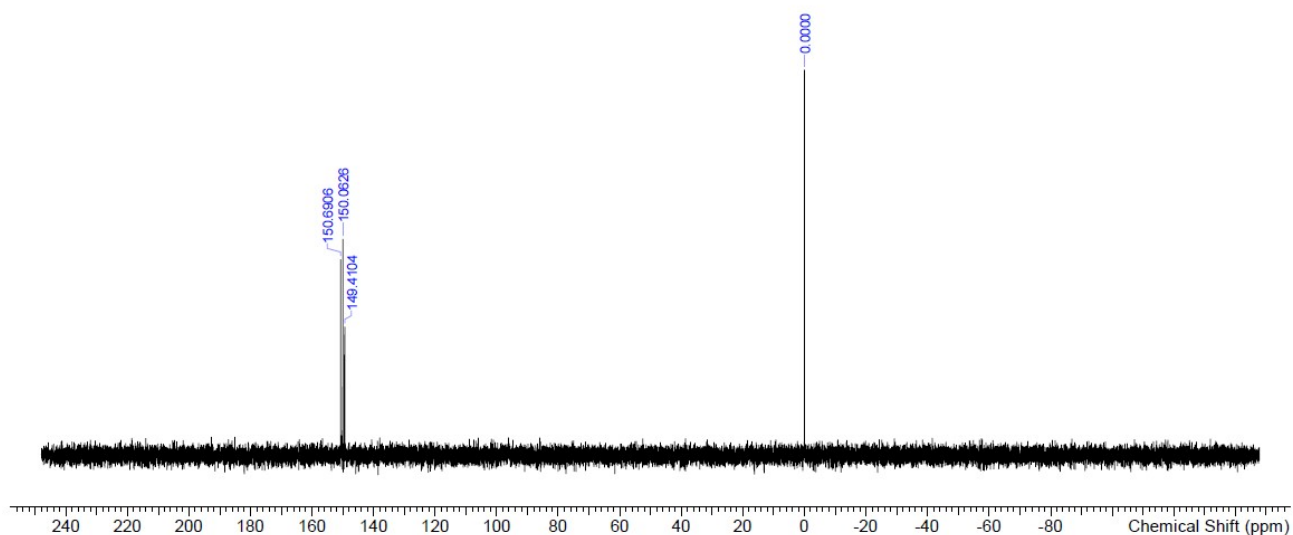

High resolution mass spectra of  $m\text{Cbz-3a}$



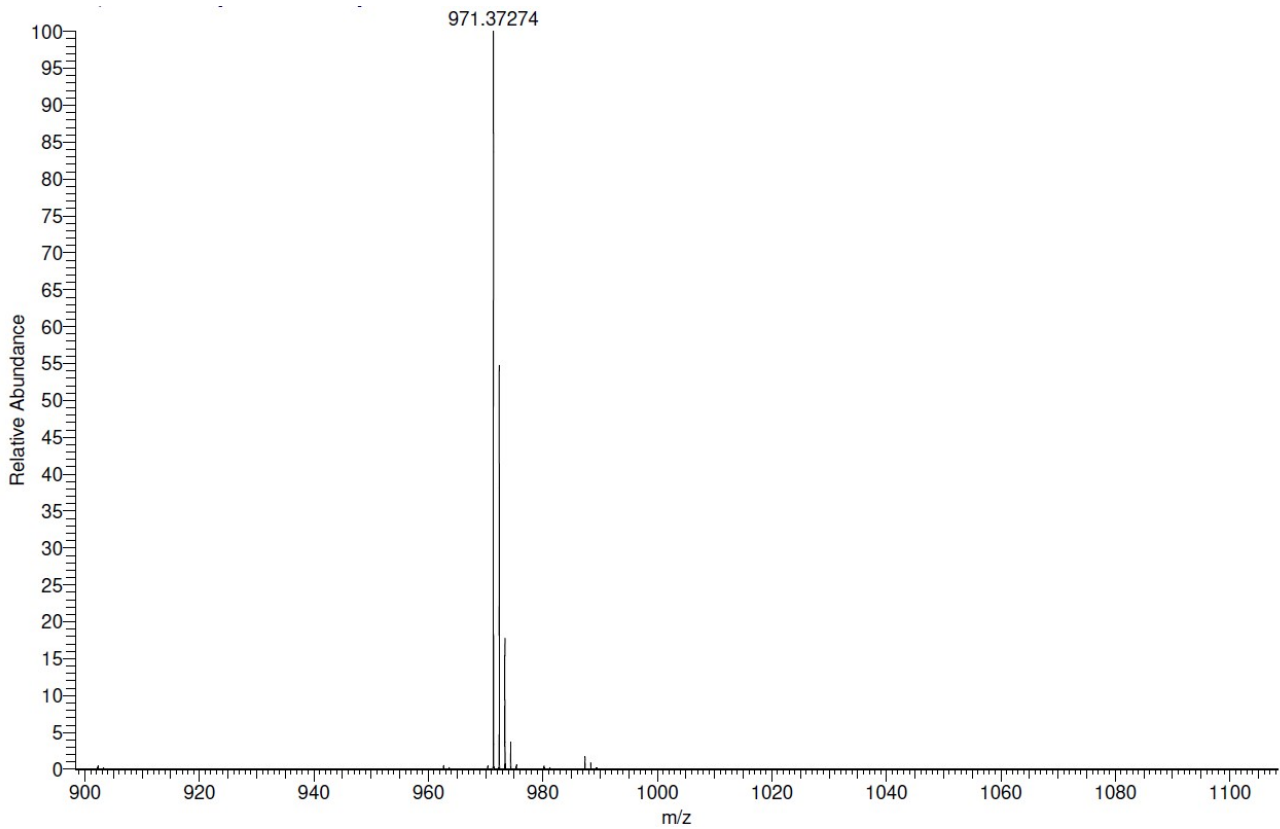

Elemental composition search on mass 971.37274

m/z = 966.37274-976.37274

| m/z       | Theo. Mass | Delta (ppm) | RDB equiv. | Composition                                                                    |
|-----------|------------|-------------|------------|--------------------------------------------------------------------------------|
| 971.37274 | 971.37147  | 1.30        | 25.5       | C <sub>50</sub> H <sub>55</sub> O <sub>9</sub> N <sub>6</sub> F <sub>3</sub> P |

**3-[[[(1R,3R,4R,7S)-1-[[bis(4-methoxyphenyl)-phenyl-methoxy]methyl]-5-methyl-3-(5-methyl-2,4-dioxo-pyrimidin-1-yl)-2-oxa-5-azabicyclo[2.2.1]heptan-7-yl]oxy-(diisopropylamino)phosphanyl]oxypropanenitrile (T-3b)**

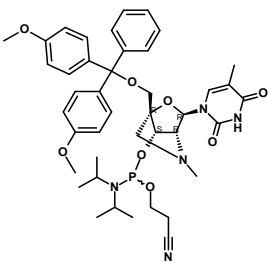

<sup>1</sup>H NMR (400 MHz, CHLOROFORM-d) of T-3b

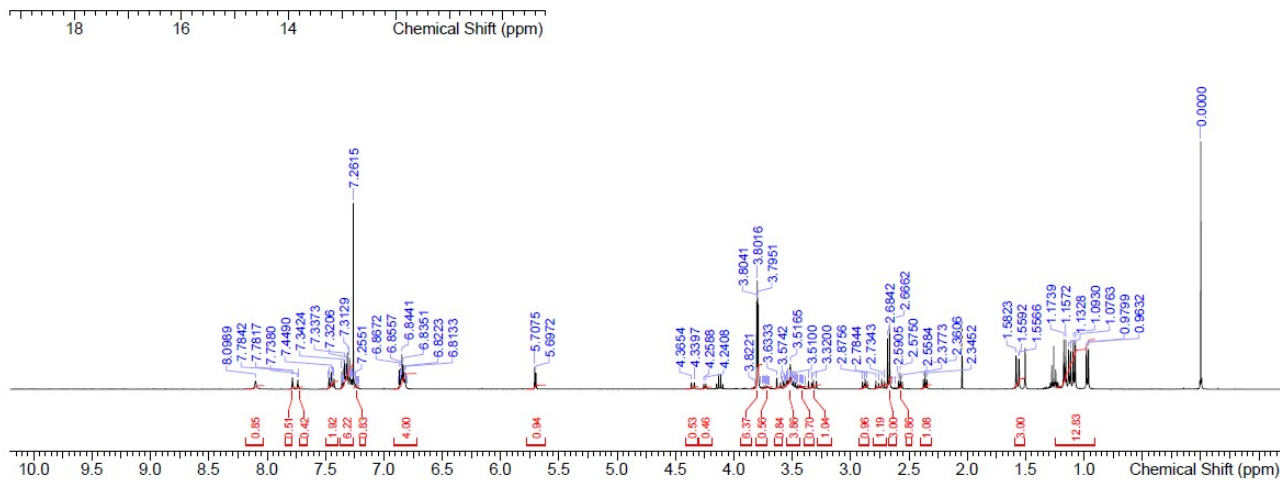

$^1\text{H}$  NMR (162 MHz, CHLOROFORM- $d$ ) of T-3b

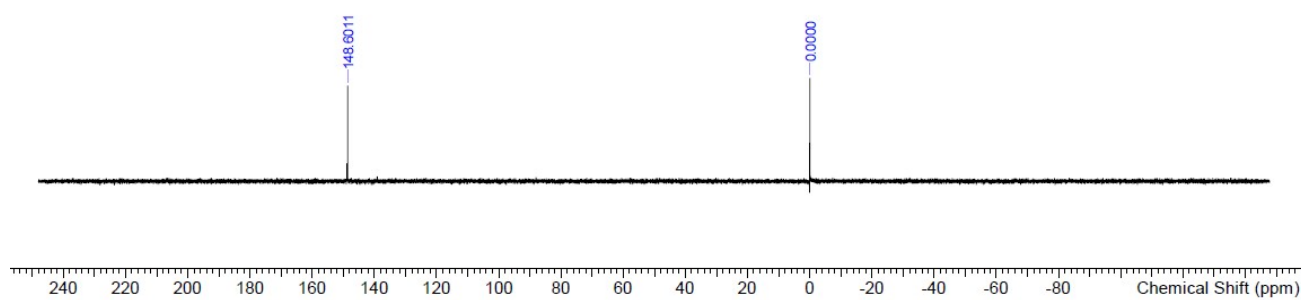

High resolution mass spectra of T-3b

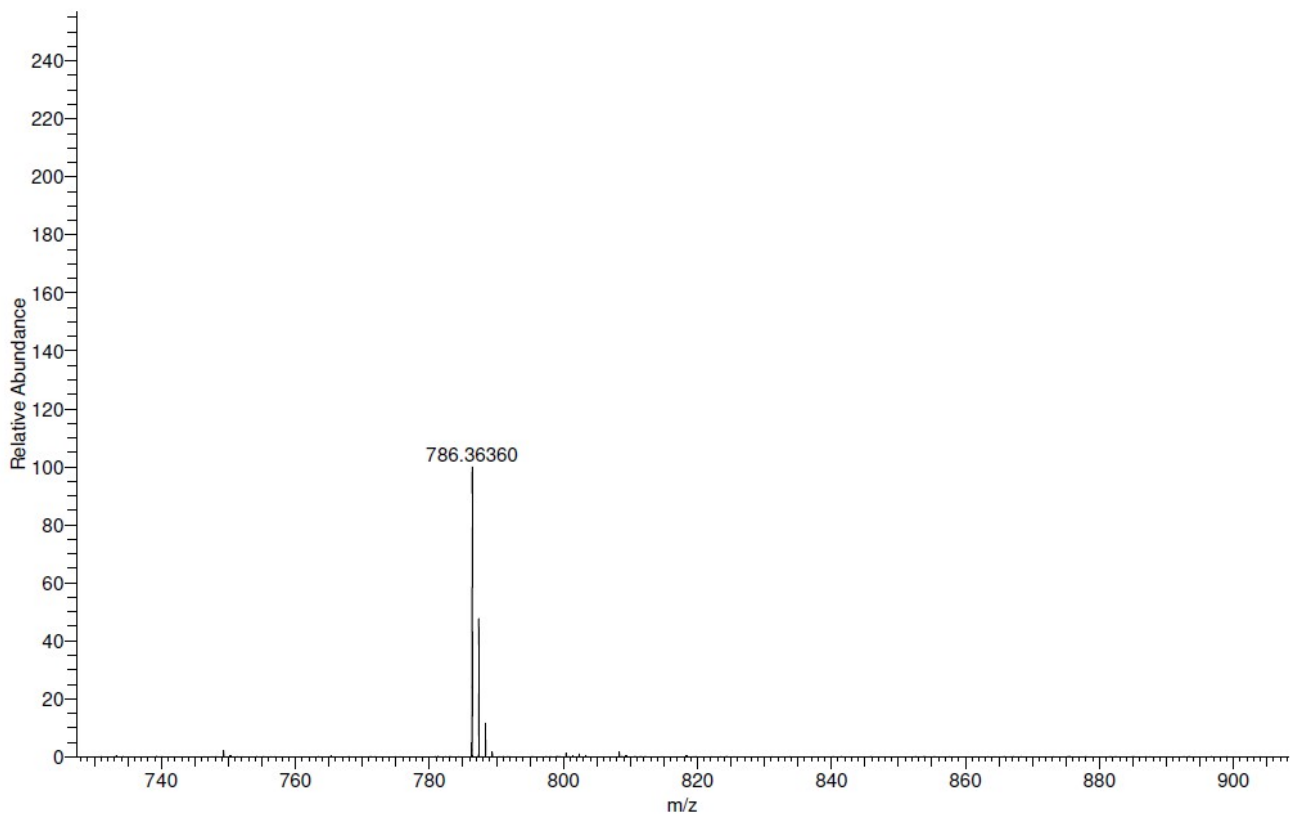

Elemental composition search on mass 786.36360

m/z = 781.36360-791.36360

| m/z       | Theo. Mass | Delta (ppm) | RDB equiv. | Composition                                                     |
|-----------|------------|-------------|------------|-----------------------------------------------------------------|
| 786.36360 | 786.36263  | 1.24        | 19.5       | C <sub>42</sub> H <sub>53</sub> O <sub>8</sub> N <sub>5</sub> P |

***N*-[9-[(1*R*,3*R*,4*R*,7*S*)-1-[[bis(4-methoxyphenyl)-phenyl-methoxy)methyl]-7-[2-cyanoethoxy-(diisopropylamino)phosphanyl]oxy-5-methyl-2-oxa-5-azabicyclo[2.2.1]heptan-3-yl]purin-6-yl]benzamide (**A<sup>bz</sup>-3b**)**

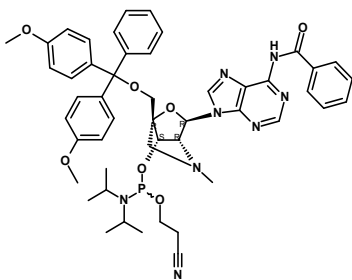

<sup>1</sup>H NMR (400 MHz, CHLOROFORM-d) of **A<sup>bz</sup>-3b**

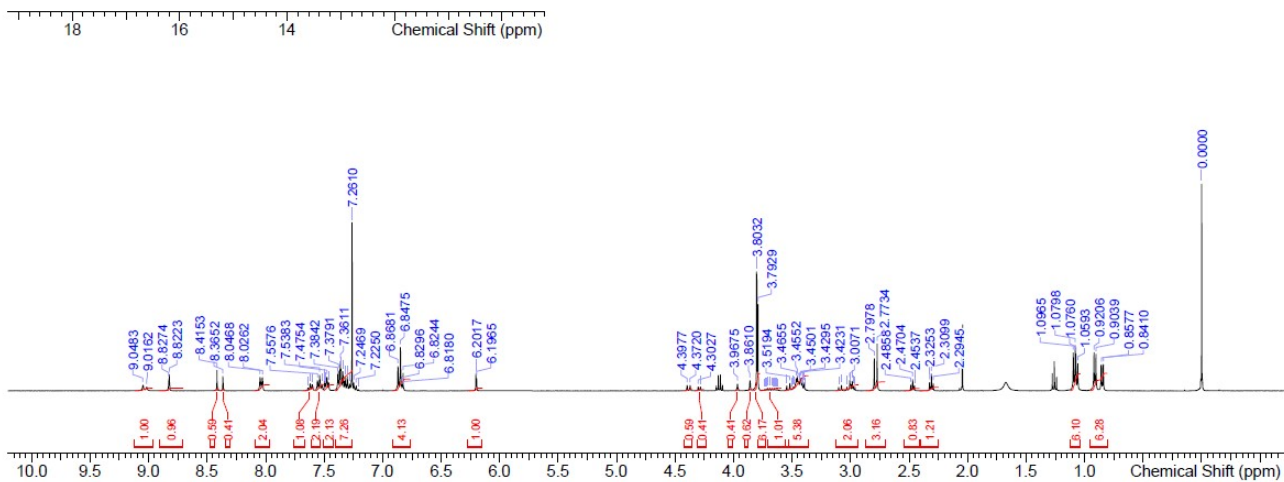

$^{31}\text{P}$  NMR (162 MHz, CHLOROFORM- $d$ ) of **A<sup>bz</sup>-3b**

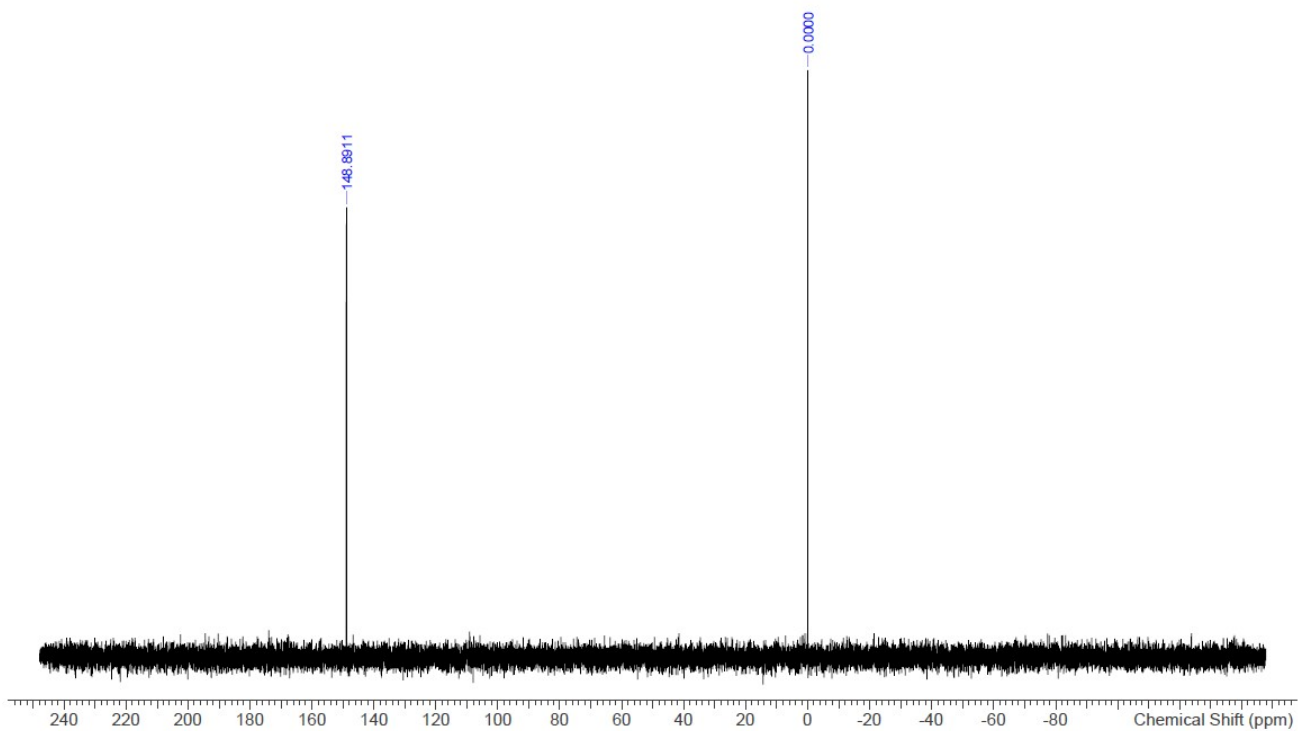

High resolution mass spectra of **A<sup>bz</sup>-3b**

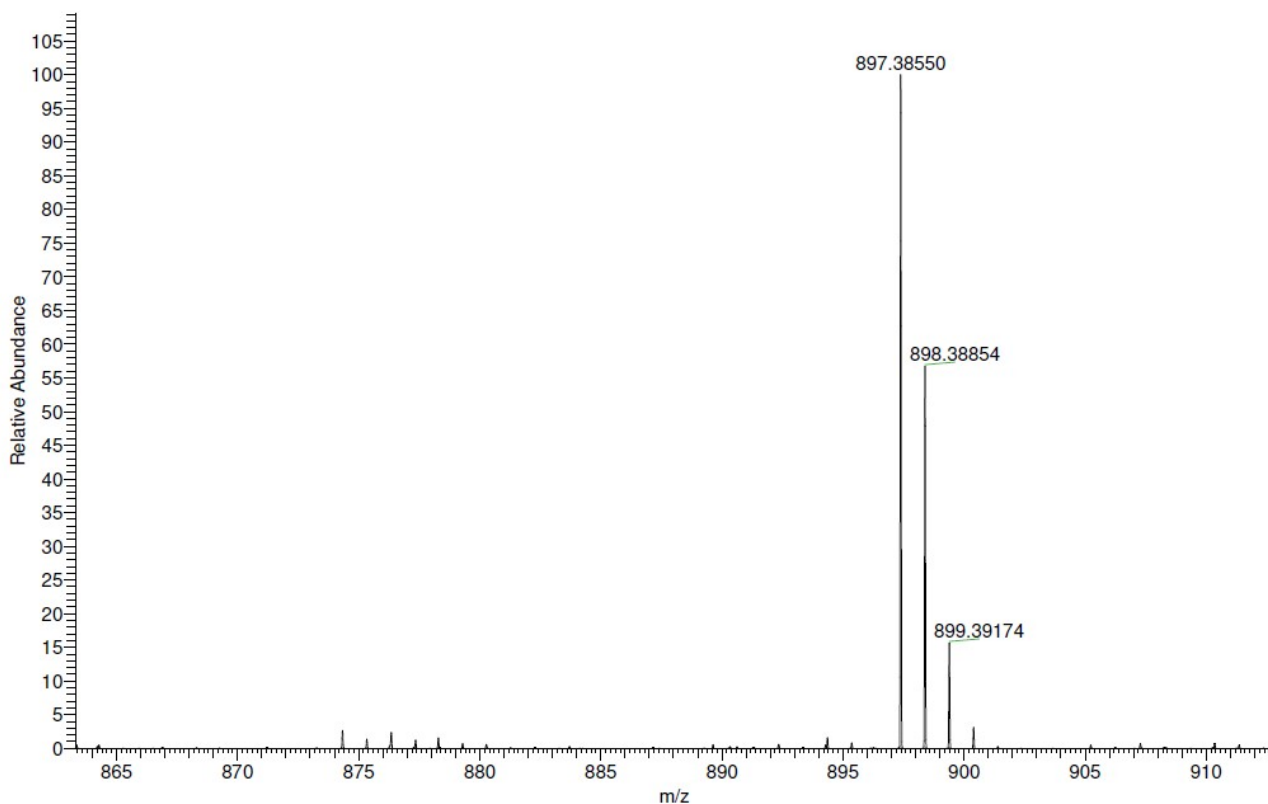

Elemental composition search on mass 897.38550

m/z= 892.38550-902.38550

| m/z       | Theo. Mass | Delta (ppm) | RDB equiv. | Composition                                                     |
|-----------|------------|-------------|------------|-----------------------------------------------------------------|
| 897.38550 | 897.38586  | -0.40       | 27.5       | C <sub>49</sub> H <sub>54</sub> O <sub>7</sub> N <sub>8</sub> P |

**[9-[(1R,3R,4R,7S)-1-[[bis(4-methoxyphenyl)-phenyl-methoxy]methyl]-7-[2-cyanoethoxy-(diisopropylamino)phosphanyl]oxy-5-methyl-2-oxa-5-azabicyclo[2.2.1]heptan-3-yl]-2-(2-methylpropanoylamino)purin-6-yl] N,N-diphenylcarbamate (G<sup>dpc</sup>, ibu-3b)**

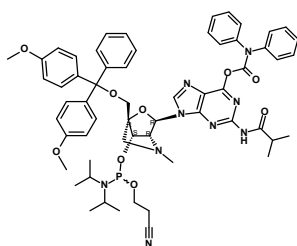

<sup>1</sup>H NMR (400 MHz, CHLOROFORM-d) of G<sup>dpc</sup>, ibu-3b

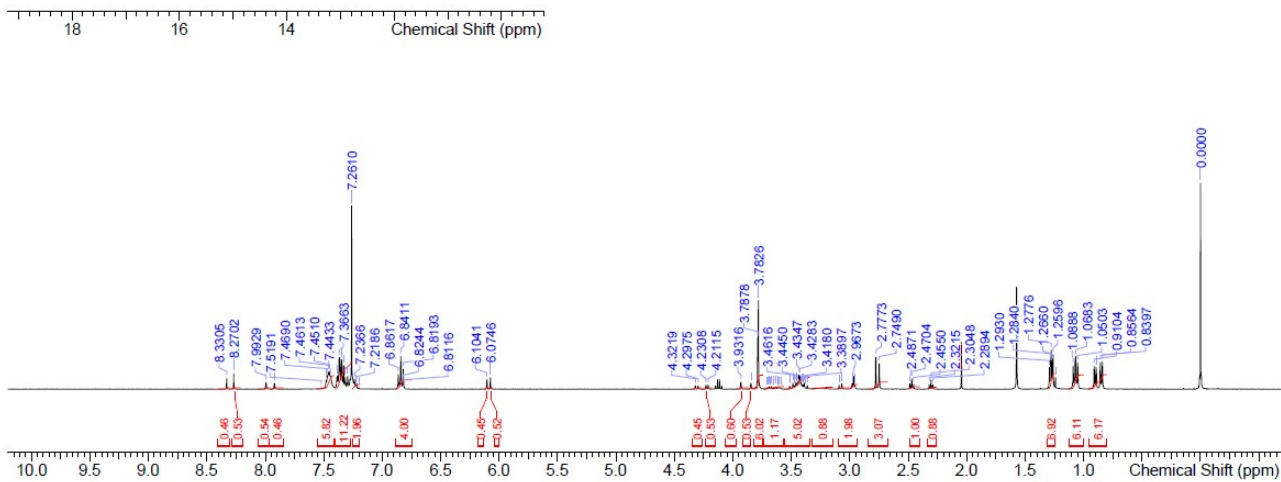

$^{31}\text{P}$  NMR (162 MHz, CHLOROFORM- $d$ ) of  $\text{G}^{\text{dpc}}$ ,  $\text{ibu-3b}$

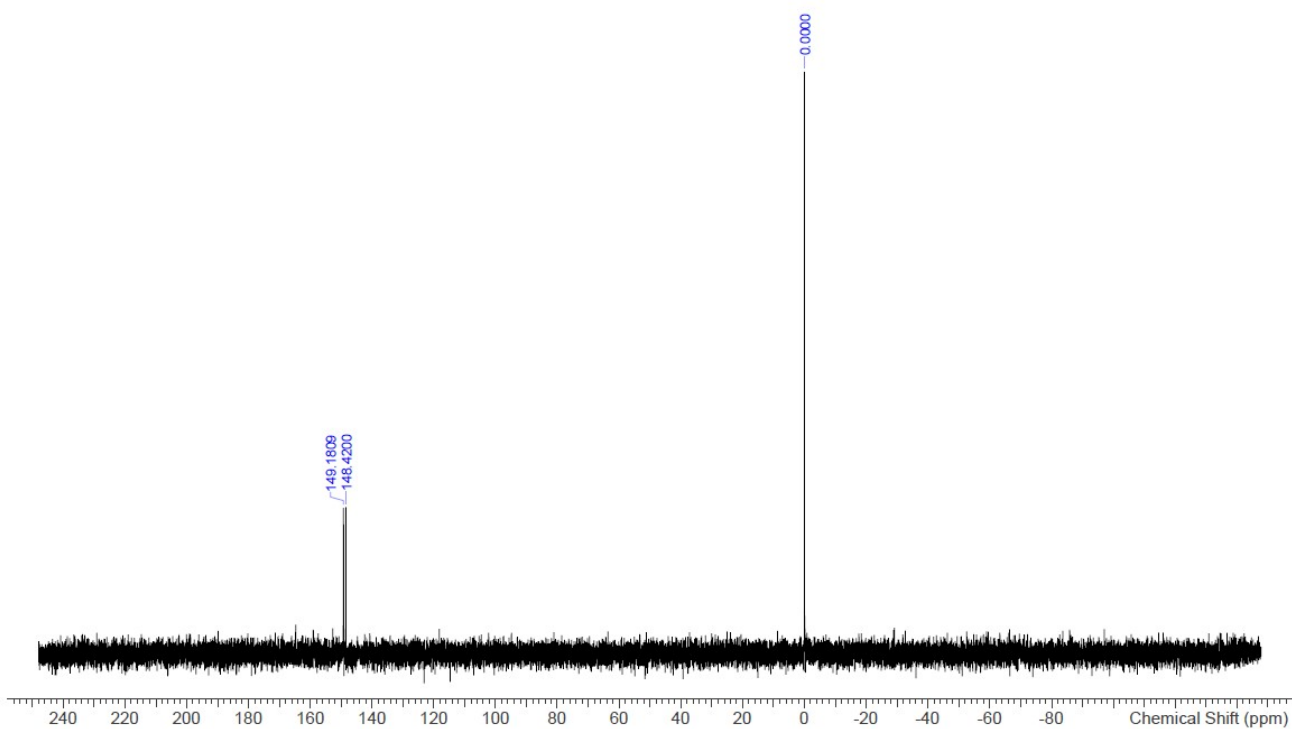

High resolution mass spectra of  $\text{G}^{\text{dpc}}$ ,  $\text{ibu-3b}$

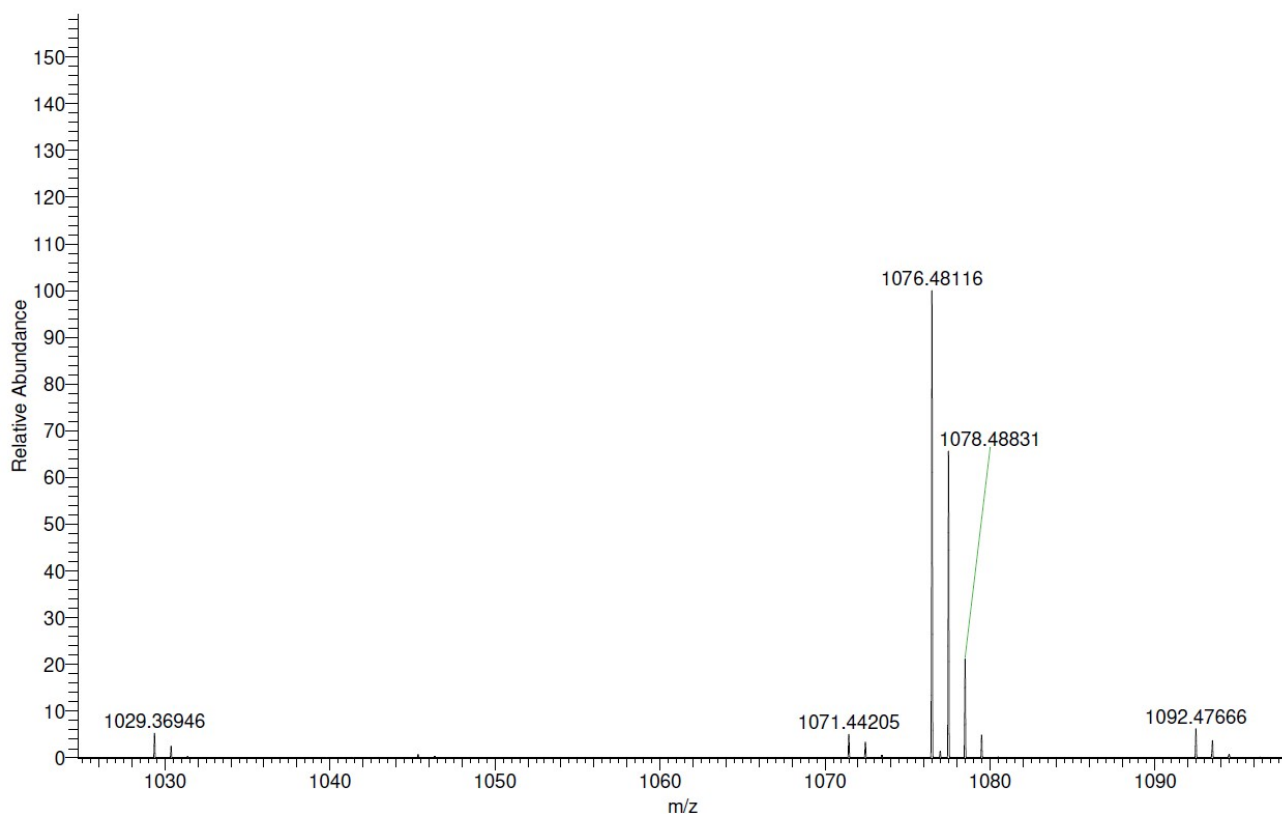

Elemental composition search on mass 1076.48116

m/z= 1071.48116-1081.48116

| m/z        | Theo. Mass | Delta (ppm) | RDB equiv. | Composition                                                     |
|------------|------------|-------------|------------|-----------------------------------------------------------------|
| 1076.48116 | 1076.48048 | 0.63        | 31.5       | C <sub>59</sub> H <sub>67</sub> O <sub>9</sub> N <sub>9</sub> P |

**N-[1-[(1R,3R,4R,7S)-1-[[bis(4-methoxyphenyl)-phenyl-methoxy]methyl]-7-[2-cyanoethoxy-(diisopropylamino)phosphanyl]oxy-5-methyl-2-oxa-5-azabicyclo[2.2.1]heptan-3-yl]-5-methyl-2-oxo-pyrimidin-4-yl]benzamide (mC<sup>bz</sup>-3b)**

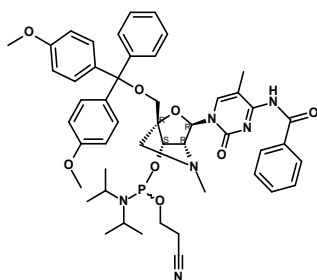

<sup>1</sup>H NMR (400 MHz, CHLOROFORM-d) of mC<sup>bz</sup>-3b

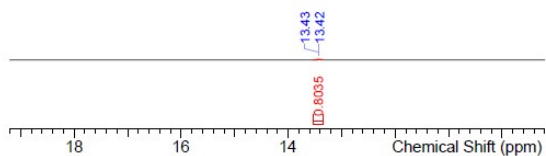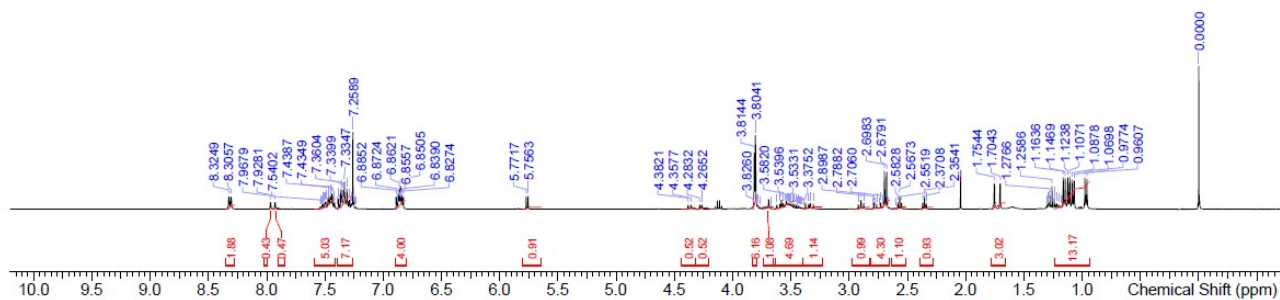

<sup>31</sup>P NMR (162 MHz, CHLOROFORM-d) of **mCbz-3b**

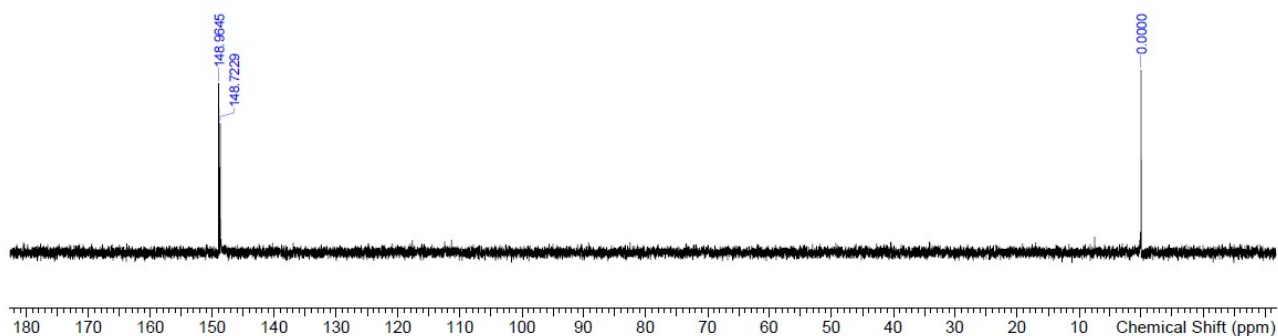

High resolution mass spectra of **mCbz-3b**



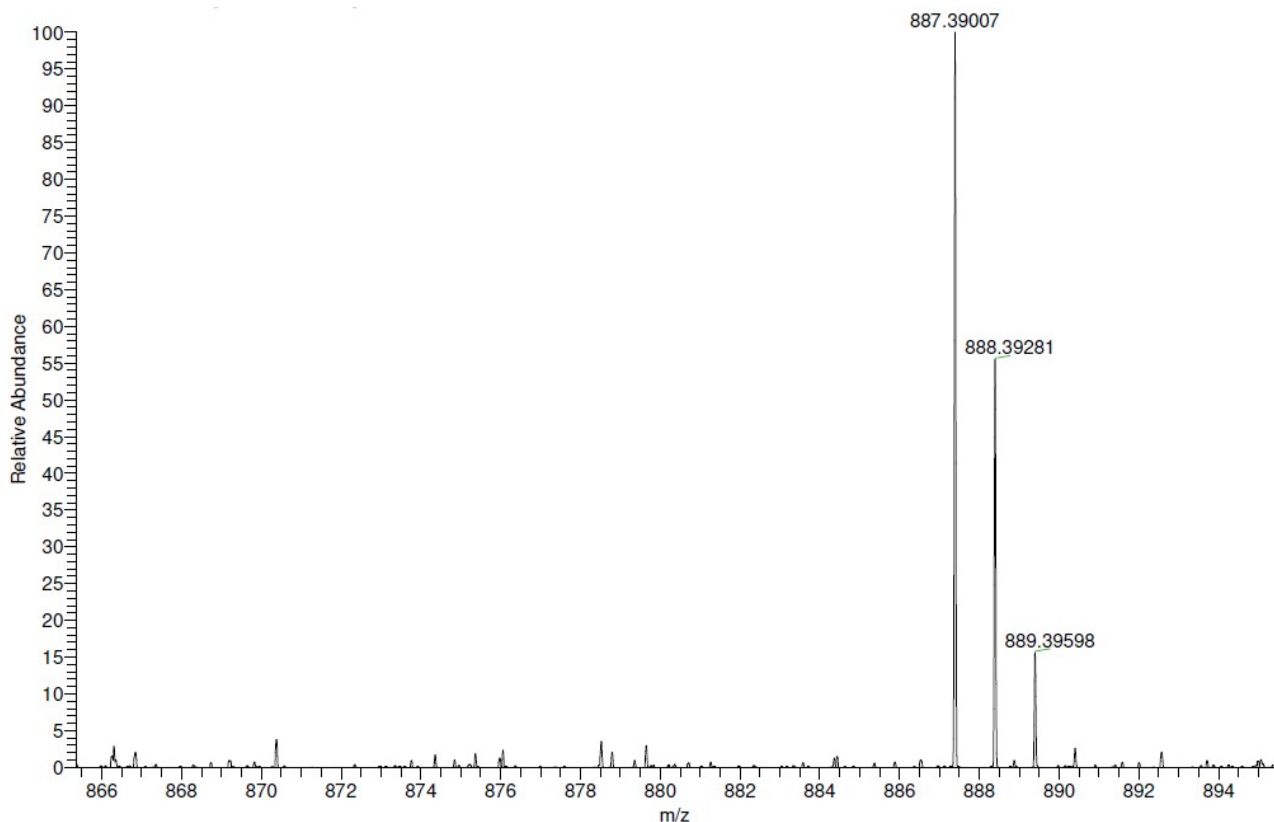

Elemental composition search on mass 887.39007

m/z= 882.39007–892.39007

| m/z       | Theo. Mass | Delta (ppm) | RDB equiv. | Composition                                                     |
|-----------|------------|-------------|------------|-----------------------------------------------------------------|
| 887.39007 | 887.39027  | -0.23       | 25.5       | C <sub>49</sub> H <sub>56</sub> O <sub>8</sub> N <sub>6</sub> P |

**Table S1. All new sequence data**

| SEQ ID           | Sequence (5' to 3') | Modification | MS     |        | Yield (%) | Synthesis   | HPLC Purity (UV %) | HPLC Retention Time (min) |
|------------------|---------------------|--------------|--------|--------|-----------|-------------|--------------------|---------------------------|
|                  |                     |              | Calcd. | Found. |           |             |                    |                           |
| <b>ON-1(DNA)</b> | GTGTTIITTTGCT       | DNA/all PO   | 3633.4 | 3630.9 | —         | solid phase | 98.9               | 9.4                       |
| <b>ON-2(LNA)</b> | GTGTTIITTTGCT       | LNA          | 3661.4 | 3661.4 | —         | solid phase | 98.5               | 9.3                       |
| <b>ON-1a</b>     | GTGTTIITTTGCT       | ALNA[H]      | 3660.4 | 3660.5 | 55        | solid phase | 100.0              | 15.2                      |
| <b>ON-1b</b>     | GTGTTIITTTGCT       | ALNA[Me]     | 3674.4 | 3675.8 | 18        | solid phase | 100.0              | 15.3                      |
| <b>ON-1c</b>     | GTGTTIITTTGCT       | ALNA[formyl] | 3688.4 | 3687.6 | 95        | PEM         | 99.1               | 12.7                      |
| <b>ON-1d</b>     | GTGTTIITTTGCT       | ALNA[Ac]     | 3702.4 | 3701.6 | 102       | PEM         | 100.0              | 15.4                      |

|                  |                                    |                  |        |        |     |             |       |      |
|------------------|------------------------------------|------------------|--------|--------|-----|-------------|-------|------|
| <b>ON-1e</b>     | GTGTTT <u>TTTT</u> GCT             | ALNA[Bz]         | 3764.5 | 3763.6 | 101 | PEM         | 97.0  | 10   |
| <b>ON-2(LNA)</b> | TTTTTTTTT <u>I</u>                 | LNA              | 3008.0 | 3007.9 | —   | solid phase | 93.6  | 12.2 |
| <b>ON-2a</b>     | TTTTTTTTT <u>I</u>                 | ALNA[H]          | 3007.0 | 3006.2 | 20  | solid phase | 94.7  | 12.1 |
| <b>ON-2b</b>     | TTTTTTTTT <u>I</u>                 | ALNA[Me]         | 3021.0 | 3020.7 | 21  | solid phase | 96.6  | 12.2 |
| <b>ON-2c</b>     | TTTTTTTTT <u>I</u>                 | ALNA[formyl]     | 3035.0 | 3034.3 | 94  | PEM         | 93.8  | 12.3 |
| <b>ON-2d</b>     | TTTTTTTTT <u>I</u>                 | ALNA[Ac]         | 3049.0 | 3048.4 | 97  | PEM         | 95.1  | 14.8 |
| <b>ON-2e</b>     | TTTTTTTTT <u>I</u>                 | ALNA[Bz]         | 3111.1 | 3110.5 | 103 | PEM         | 95.6  | 12.8 |
| <b>ON-3a</b>     | <u>AACATCAGTCTGATAAGCT</u>         | ALNA[H]          | 6288.2 | 6287.3 | 22  | solid phase | 97.8  | 14.9 |
| <b>ON-3b</b>     | <u>AACATCAGTCTGATAAGCT</u>         | ALNA[Me]         | 6386.4 | 6385.4 | 16  | solid phase | 98.6  | 15.2 |
| <b>ON-3d</b>     | <u>AACATCAGTCTGATAAGCT</u>         | ALNA[Ac]         | 6582.4 | 6581.5 | 98  | PEM         | 97.2  | 15.2 |
| <b>ON-4a</b>     | <u>AACATCAGTCTGATAAGCT</u>         | ALNA[H]          | 6301.2 | 6300.7 | 19  | solid phase | 98.4  | 14.8 |
| <b>ON-4b</b>     | <u>AACATCAGTCTGATAAGCT</u>         | ALNA[Me]         | 6413.4 | 6412.8 | 34  | solid phase | 91.9  | 15.1 |
| <b>ON-4d</b>     | <u>AACATCAGTCTGATAAGCT</u>         | ALNA[Ac]         | 6637.5 | 6637.6 | 96  | PEM         | 89.5  | 15.2 |
| <b>ON-5a</b>     | <u>AACATCAGTCTGATAAGCT</u>         | ALNA[H]          | 6343.3 | 6342.0 | 20  | solid phase | 97.2  | 14.8 |
| <b>ON-5b</b>     | <u>AACATCAGTCTGATAAGCT</u>         | ALNA[Me]         | 6455.5 | 6454.6 | 14  | solid phase | 98.3  | 15.1 |
| <b>ON-5d</b>     | <u>AACATCAGTCTGATAAGCT</u>         | ALNA[Ac]         | 6679.6 | 6678.8 | 96  | PEM         | 95.7  | 15.2 |
| <b>ON-6a</b>     | <b>A</b> <u>CATCAGTCTGATAAGCTA</u> | ALNA[H]/MOE      | 6424.4 | 6424.1 | 22  | solid phase | 100.0 | 15.3 |
| <b>ON-6b</b>     | <b>A</b> <u>CATCAGTCTGATAAGCTA</u> | ALNA[Me]/MOE     | 6494.5 | 6492.4 | 14  | solid phase | 100.0 | 18.3 |
| <b>ON-6c</b>     | <b>A</b> <u>CATCAGTCTGATAAGCTA</u> | ALNA[formyl]/MOE | 6564.4 | 6563.7 | 97  | PEM         | 99.1  | 15.5 |
| <b>ON-6d</b>     | <b>A</b> <u>CATCAGTCTGATAAGCTA</u> | ALNA[Ac]/MOE     | 6634.6 | 6634.3 | 95  | PEM         | 100.0 | 18.2 |
| <b>ON-6e</b>     | <b>A</b> <u>CATCAGTCTGATAAGCTA</u> | ALNA[Bz]/MOE     | 6944.9 | 6939.6 | 99  | PEM         | 100.0 | 13.8 |

Capital letters in the sequences refer to DNA (black), 2'-MOE (bold) and modified-amino-LNAs (underline, C denote methylcytosine). All phosphodiester linkages of **ON-3** to **ON-6** were replaced by phosphorothioate (PS) linkages.

#### RP-HPLC purification condition

Mobile phase A: 20 mM Hexylamine acetate in water

Mobile phase B: Acetonitrile

Gradient condition: 10-50% in 40 min

Flow rate: 4 mL/min

Column: Waters XBridge™ Oligonucleotide BEH C18 OBDTM Prep Column, 130Å 2.5 μm (10 × 50 mm)

Column oven temperature: 60 °C

Detector: UV 260 nm

#### **RP-HPLC analysis conditions**

##### **ON-1 (DNA) and ON-1 (LNA) (purchased from GeneDesign)**

Mobile phase A: 100 mM HFIP / 8mM TEA in water

Mobile phase B: Methanol

gradient condition: 5-20 % (20min)

Flow rate: 1 mL/min

Column: Waters XBridge™ BEH C18 2.5 μm (4.6 × 75 mm)

Column oven temperature: 60 °C

Detector: UV 260 nm

##### **ON1a~ON-6e**

Mobile phase A: 20 mM Hexylamine acetate in water

Mobile phase B: Acetonitrile

Flow rate: 1 mL/min

Column: Waters XBridge™ BEH C18 130Å 2.5 μm (4.6 × 50 mm)

Column oven temperature: 60 °C

Detector: UV 260 nm

#### **HPLC charts of oligonucleotides**

##### **ON-1 (DNA) (purchased from GeneDesign)**

**HPLC (gradient condition: B% 5-20 % in 20 min)**

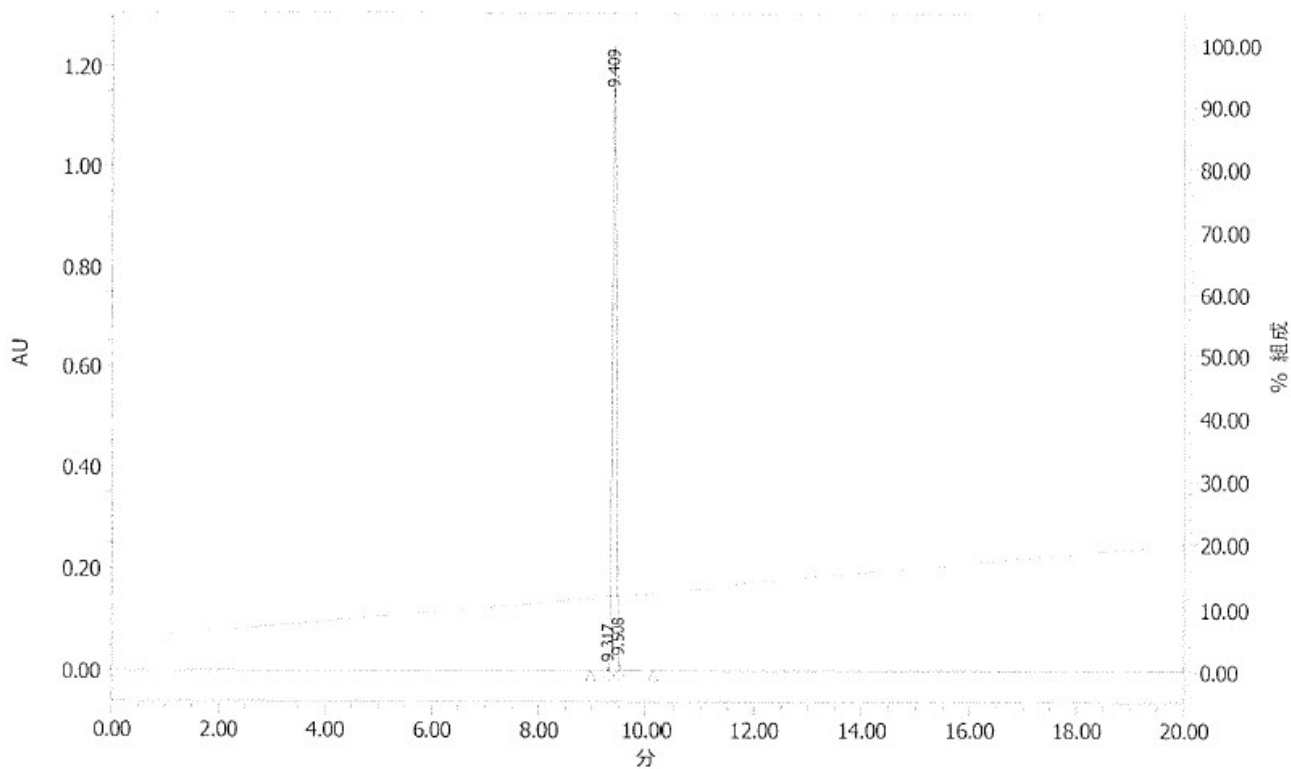

**ON-1 (LNA) (purchased from GeneDesign)**

**HPLC (gradient condition: B% 5-20 % in 20 min)**

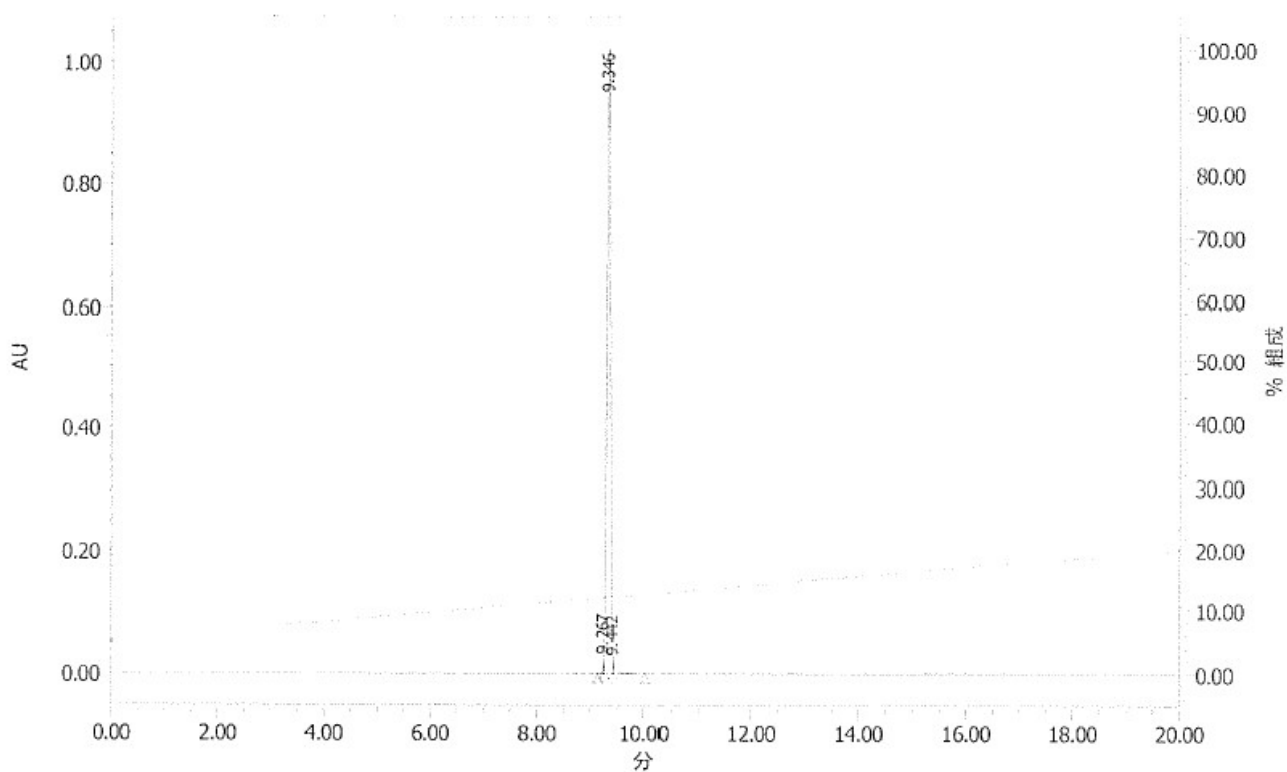

**ON-1a**

**HPLC (gradient condition: B% 5-50 % in 22.5 min, then 100% in 5 min)**

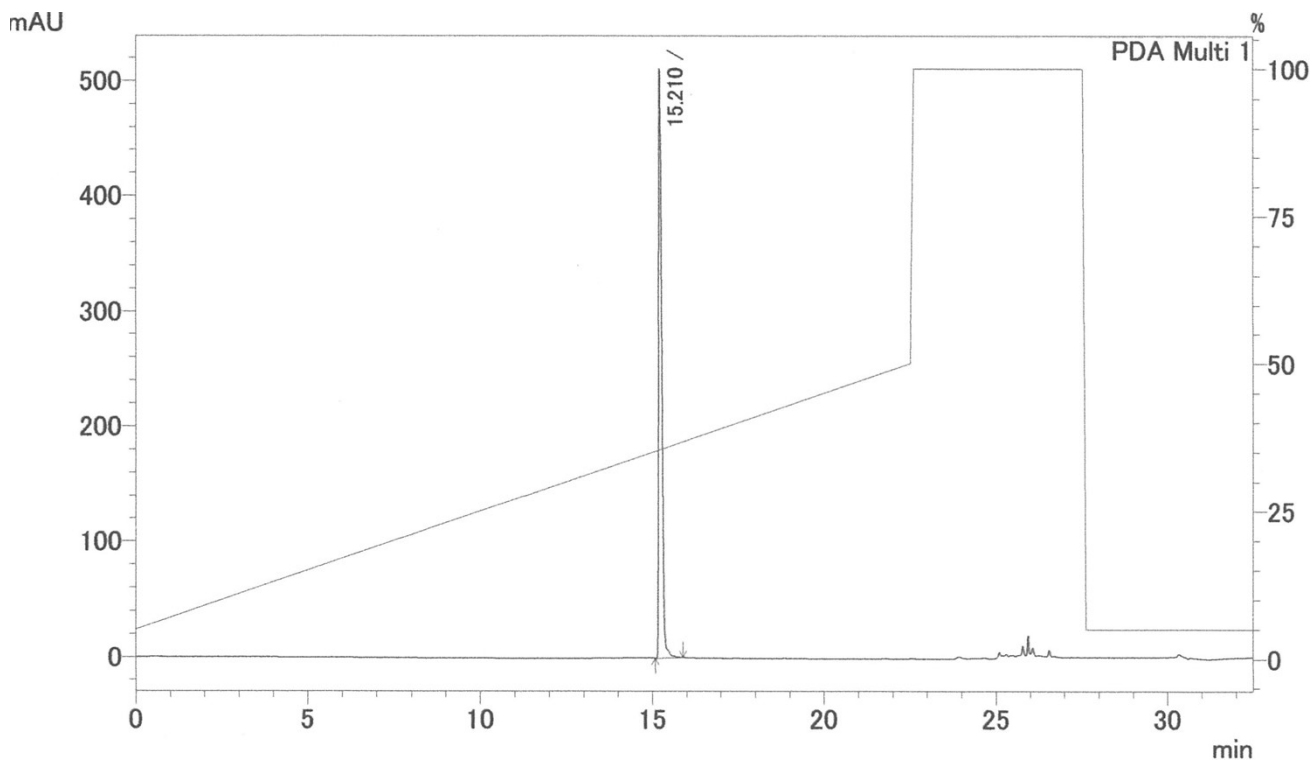

**ON-1b**

**HPLC (gradient condition: B% 10-50 % in 20 min, then 100% in 3 min)**

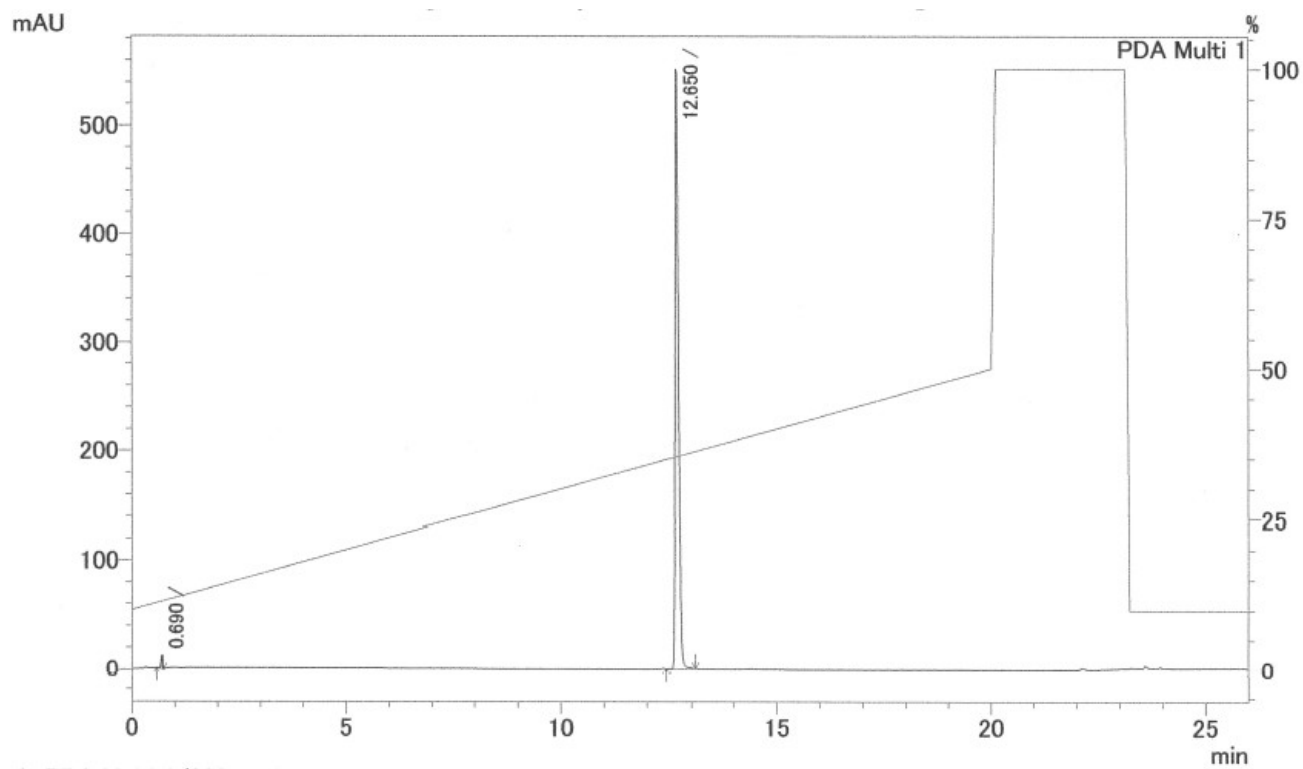

**ON-1c**

**HPLC (gradient condition: B% 5-50 % in 22.5 min, then 100% in 5 min)**

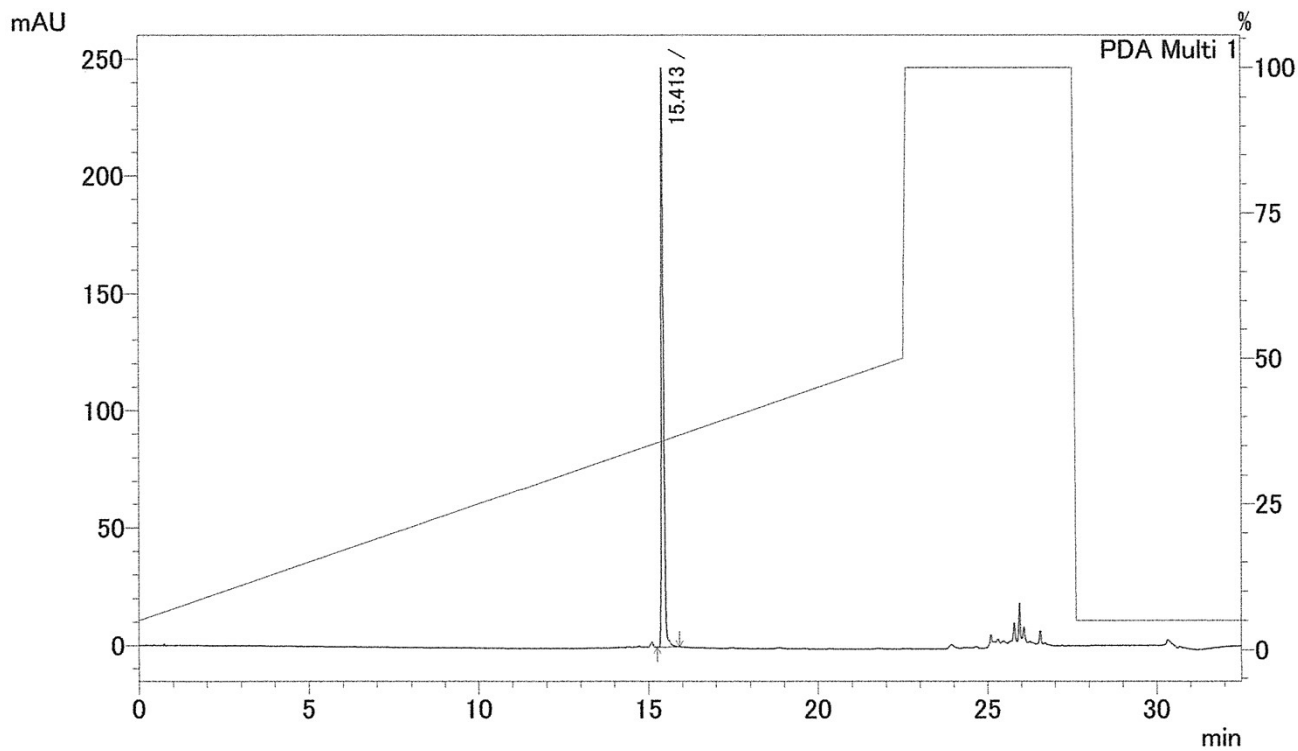

ON-1d

HPLC (gradient condition: B% 10-65 % in 18 min, then 100% in 5 min)

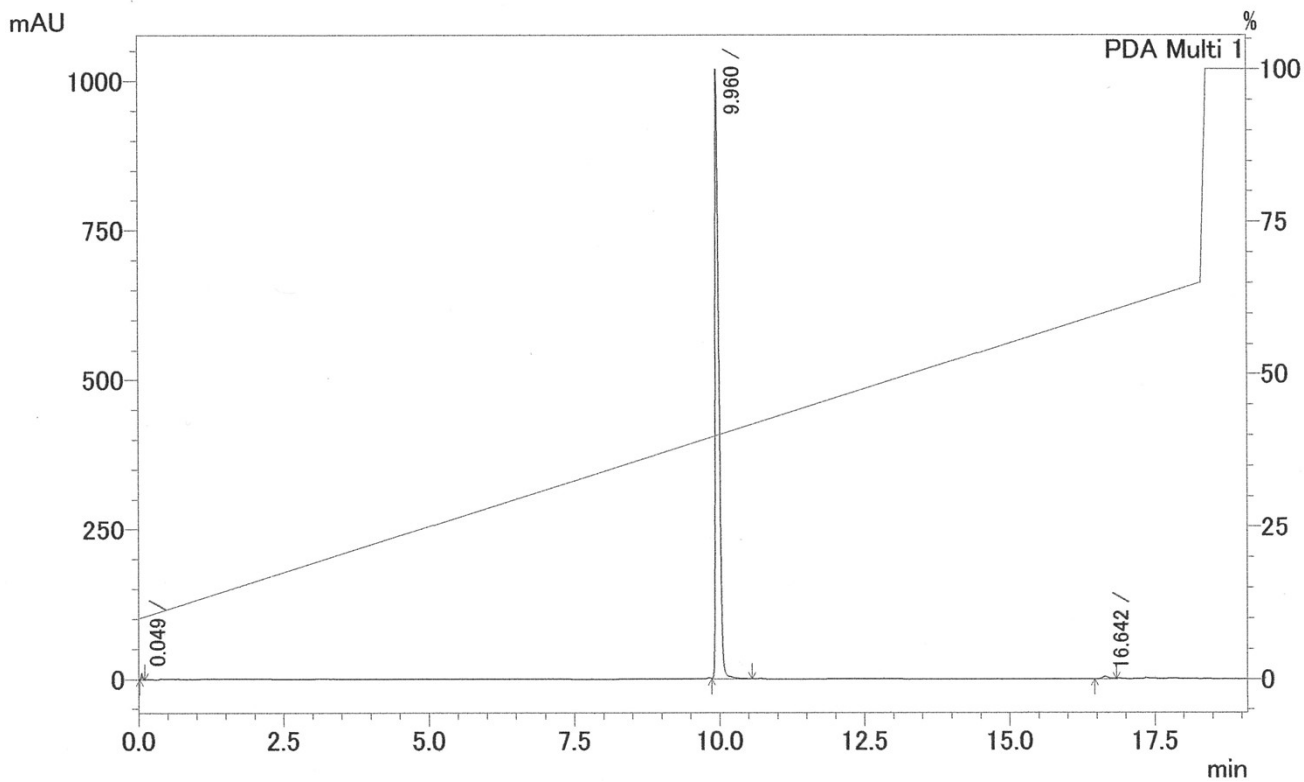

ON-1e

HPLC (gradient condition: B% 10-50 % in 20 min, then 100% in 3 min)

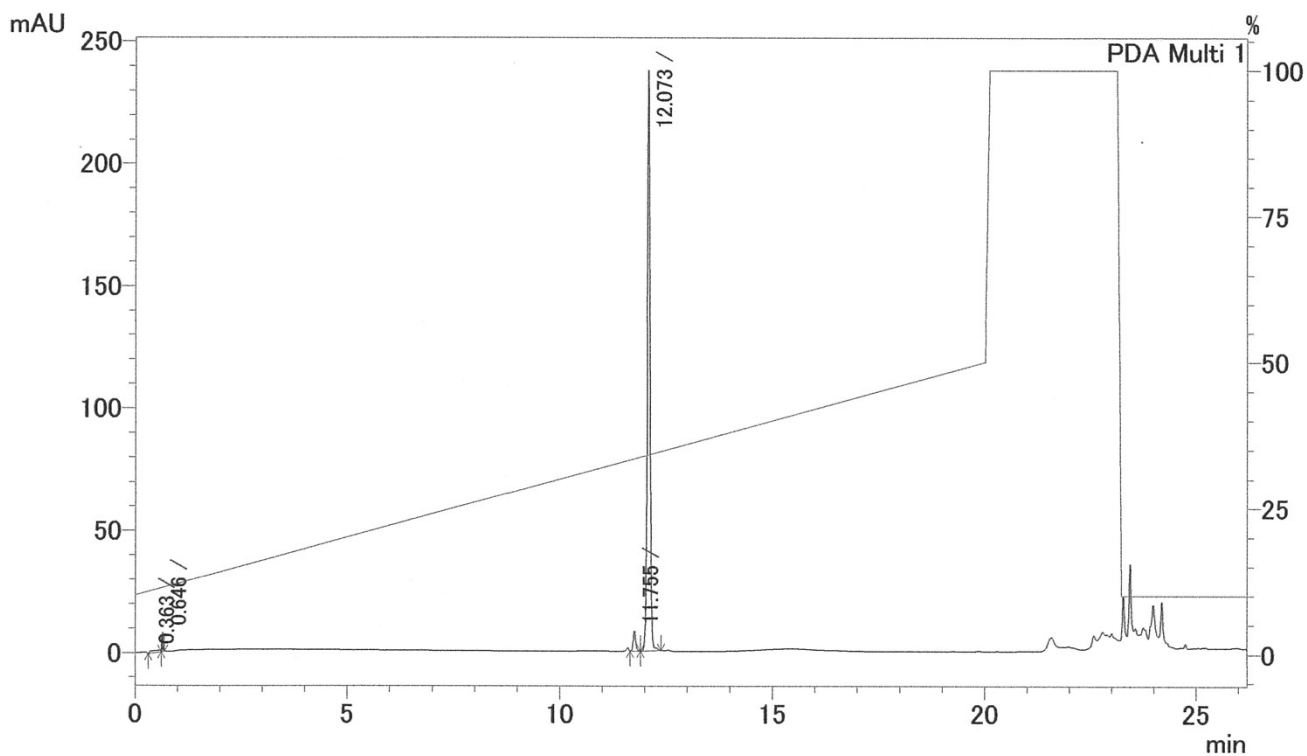

ON-2 (LNA)

HPLC (gradient condition: B% 10-50 % in 20 min, then 100% in 3 min)

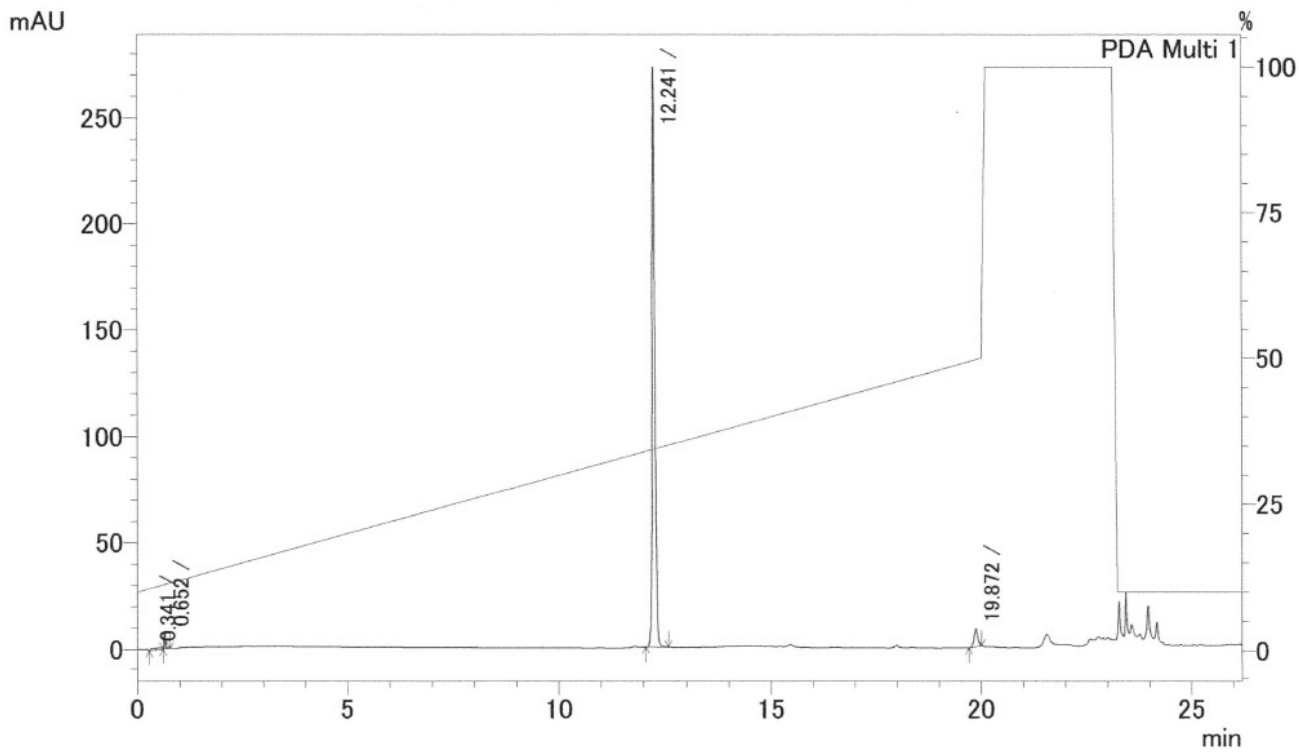

ON-2a

HPLC (gradient condition: B% 10-50 % in 20 min, then 100% in 3 min)

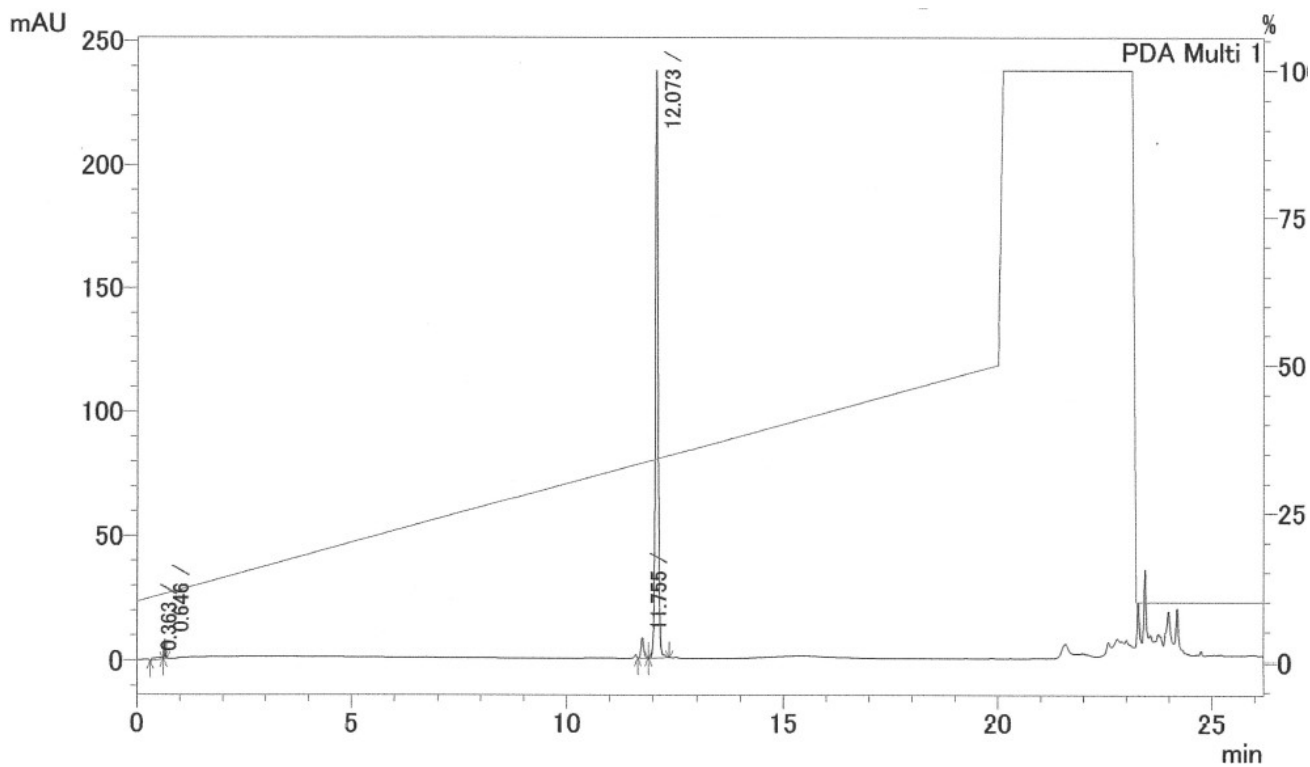

ON-2b

HPLC (gradient condition: B% 10-50 % in 20 min, then 100% in 3 min)

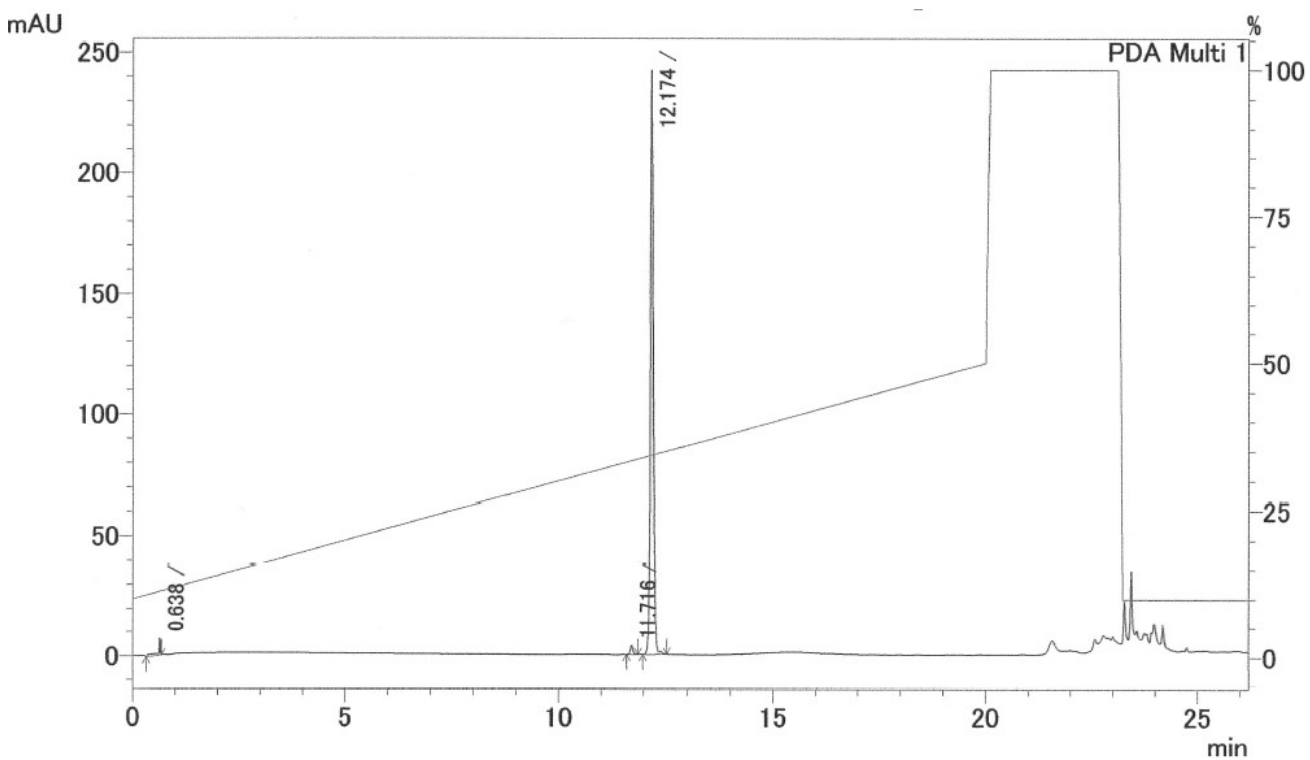

ON-2c

HPLC (gradient condition: B% 10-50 % in 20 min, then 100% in 3 min)



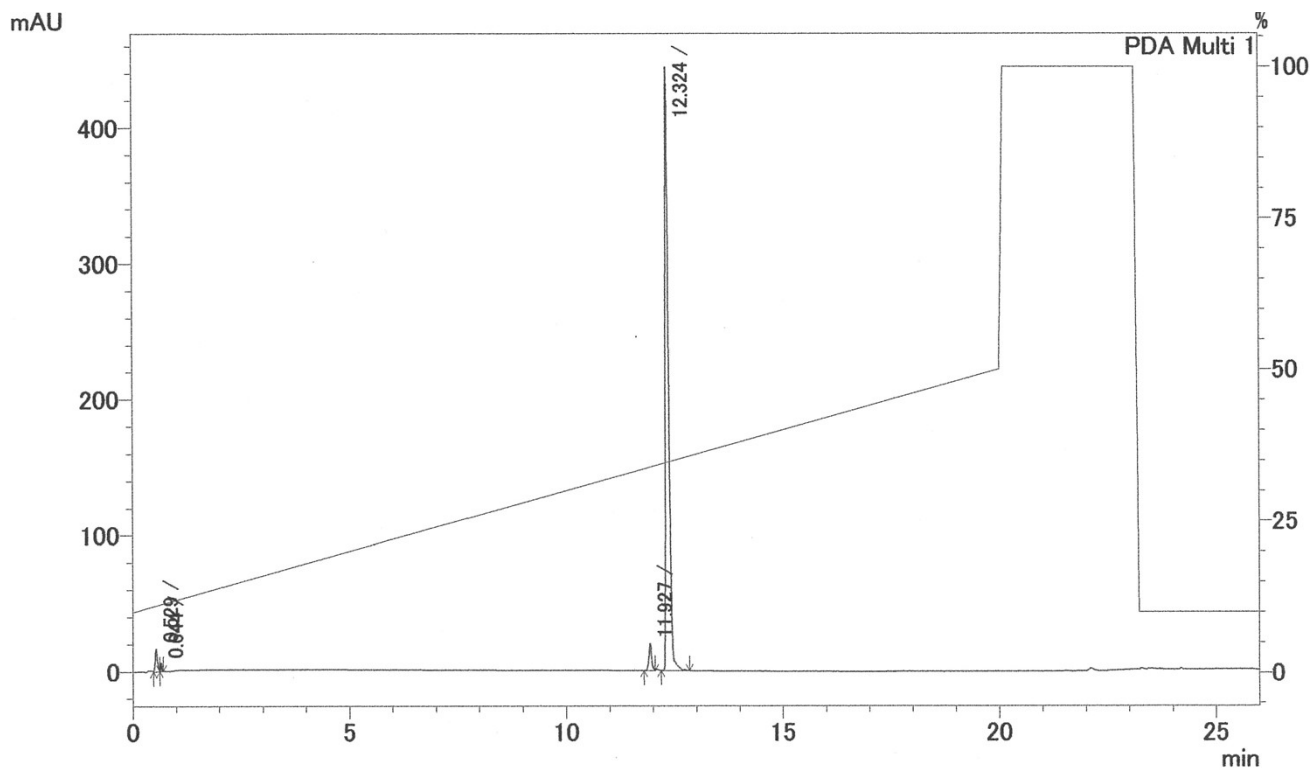

**ON-2d**

**HPLC (gradient condition: B% 10-50 % in 20 min, then 100% in 3 min)**

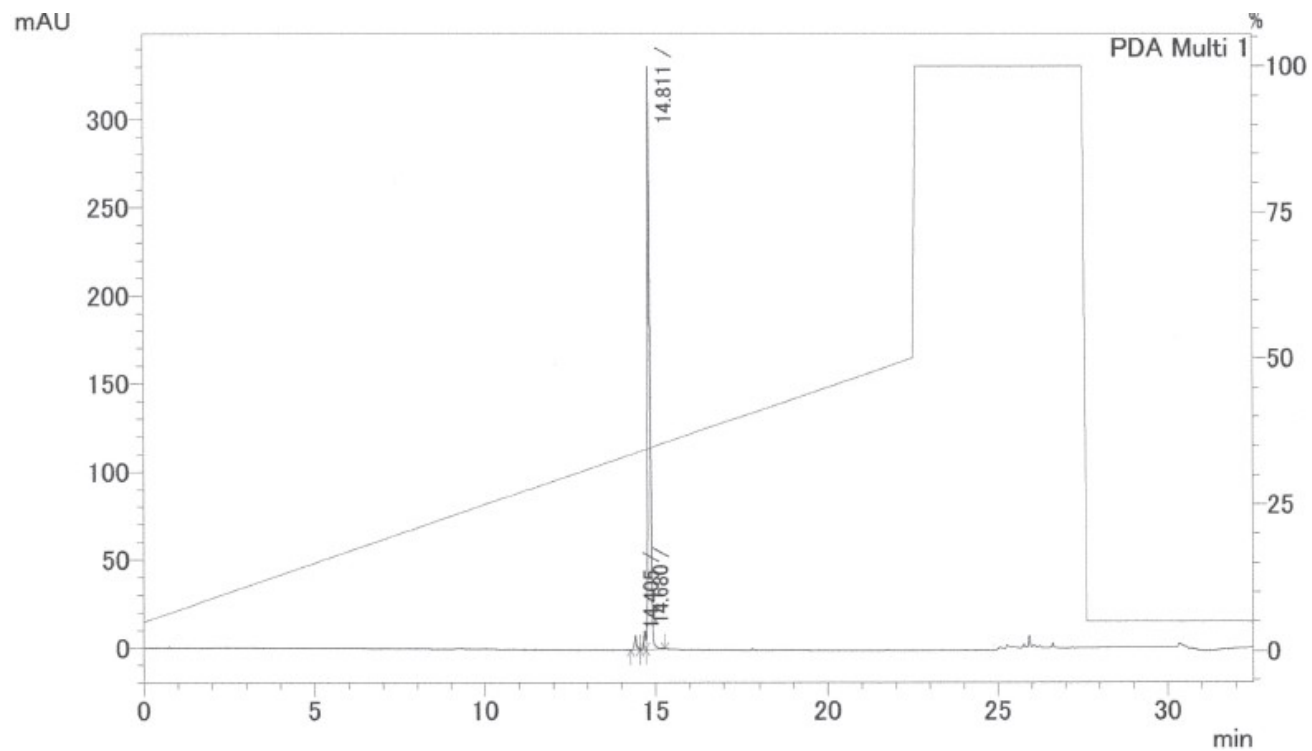

**ON-2e**

**HPLC (gradient condition: B% 10-50 % in 20 min, then 100% in 3 min)**

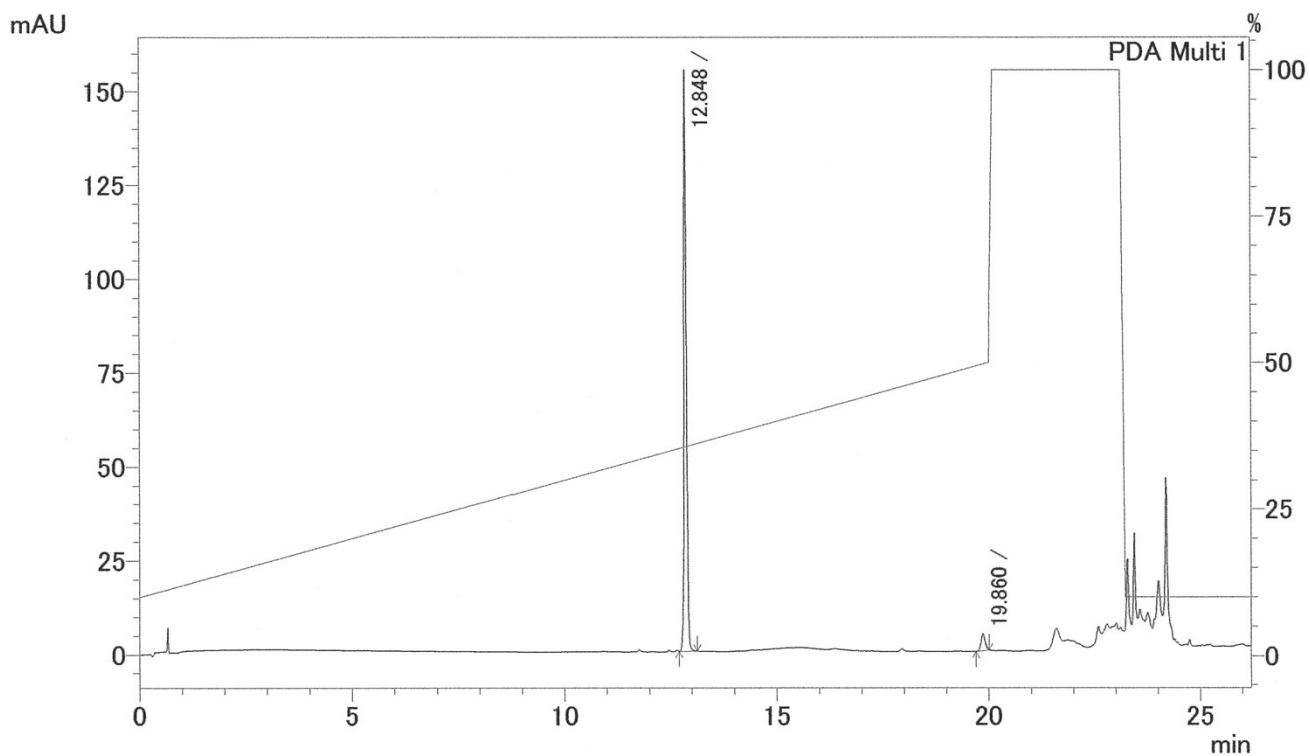

**ON-3a**

**HPLC (gradient condition: B% 10-50 % in 20 min, then 100% in 3 min)**

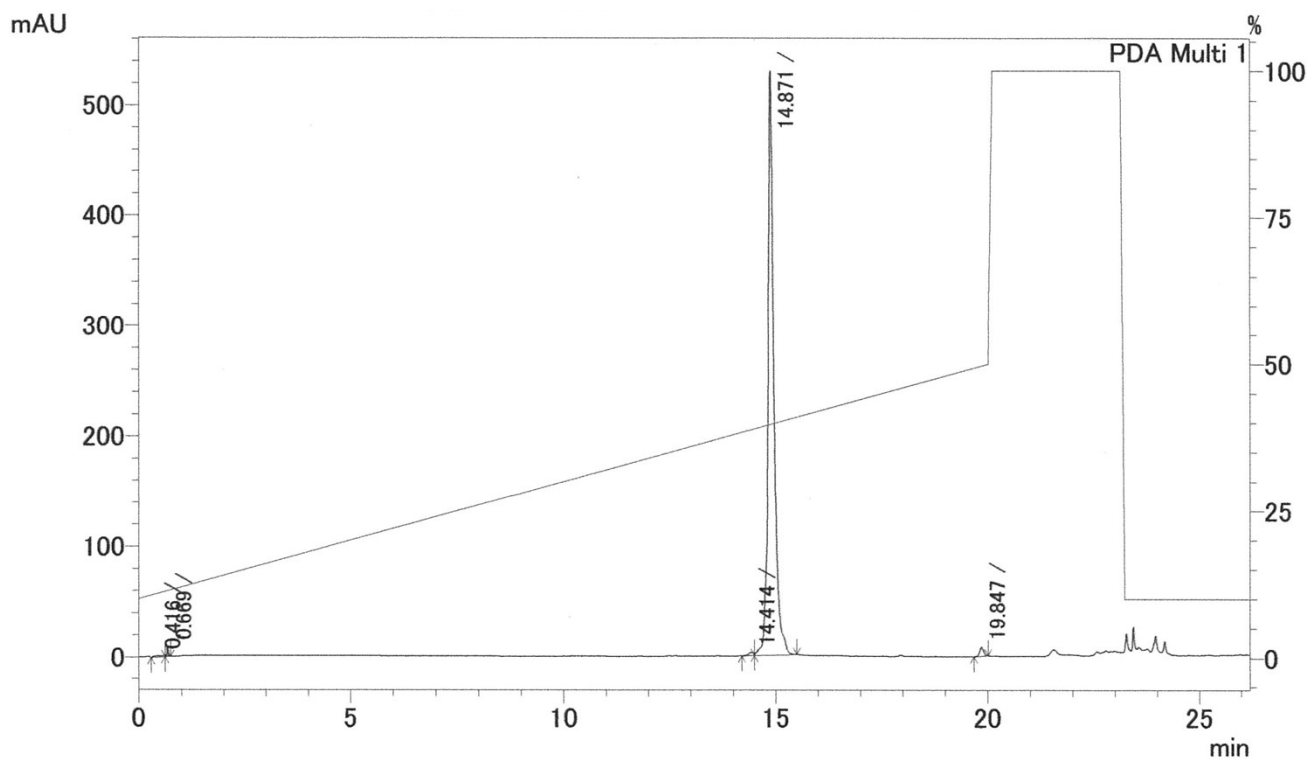

**ON-3b**

**HPLC (gradient condition: B% 10-50 % in 20 min, then 100% in 3 min)**

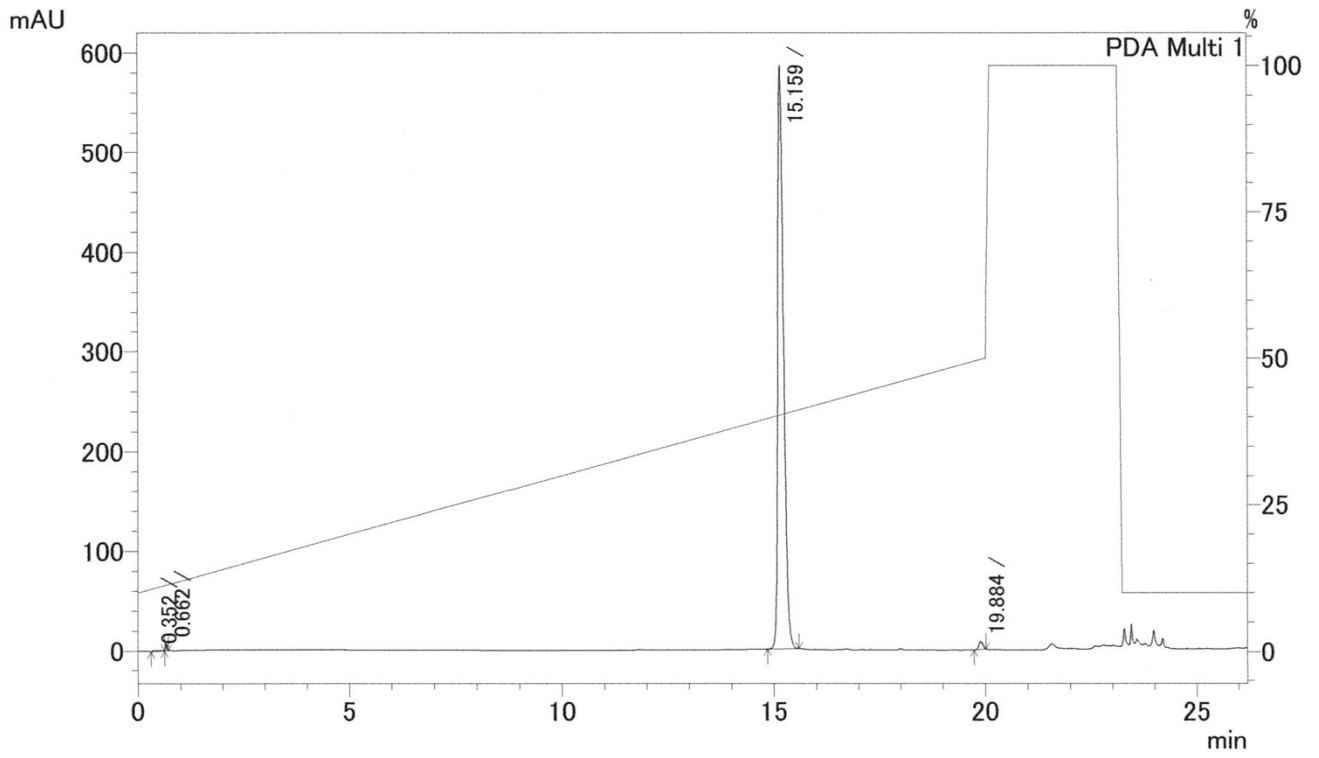

**ON-3d**

**HPLC (gradient condition: B% 10-50 % in 20 min, then 100% in 3 min)**

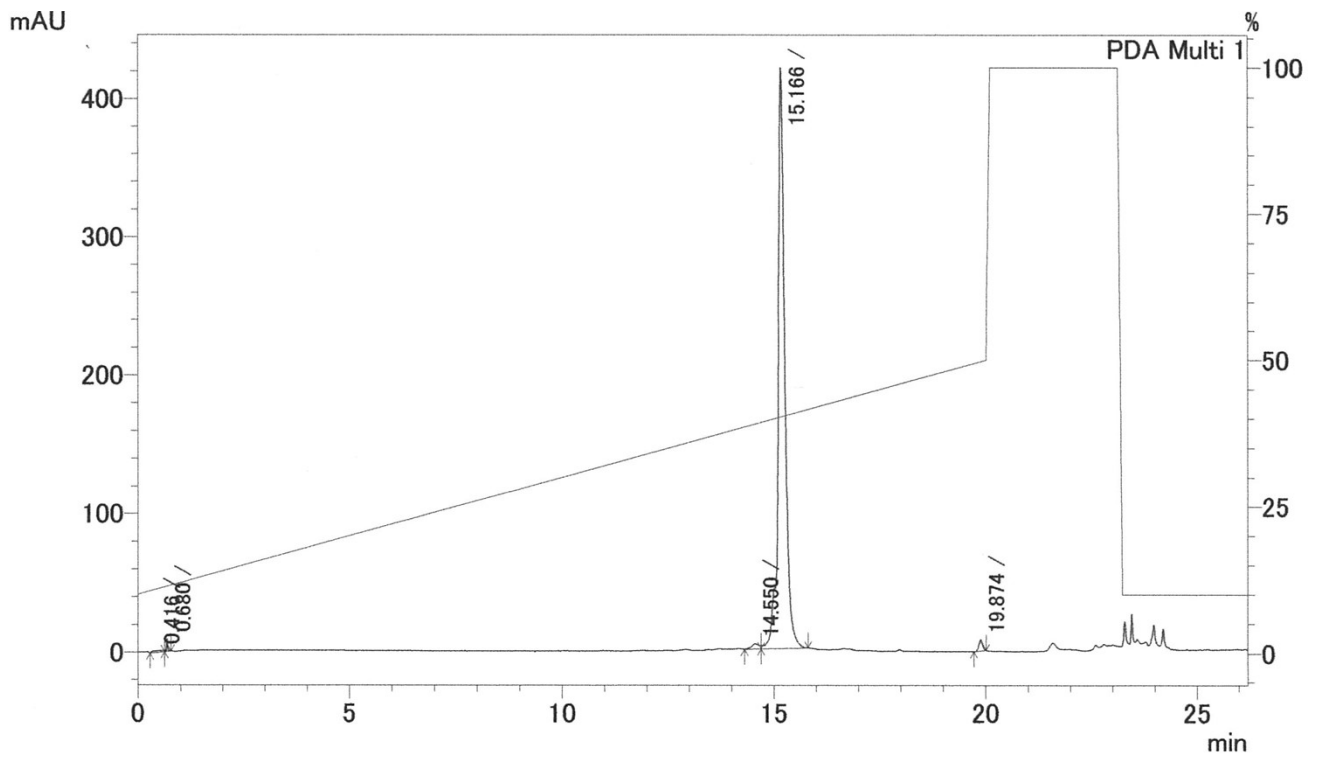

**ON-4a**

**HPLC (gradient condition: B% 10-50 % in 20 min, then 100% in 3 min)**

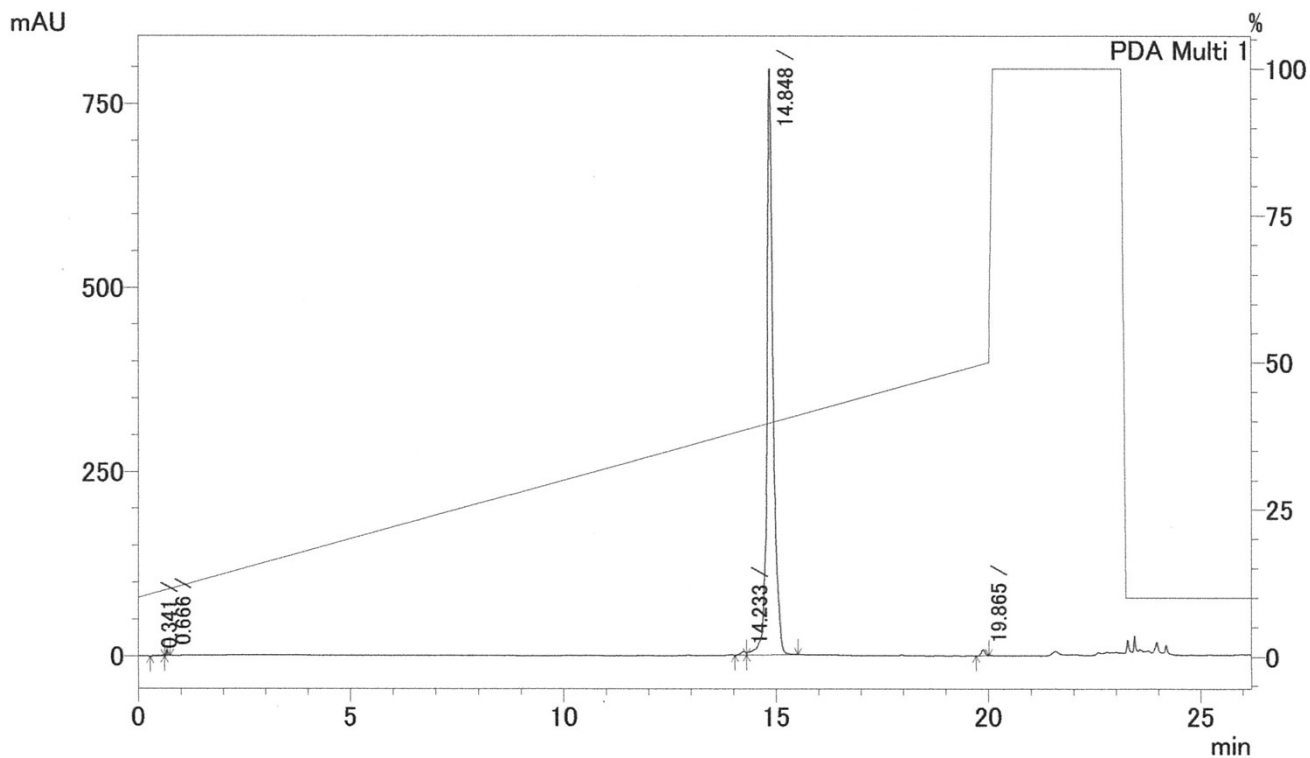

**ON-4b**

**HPLC (gradient condition: B% 10-50 % in 20 min, then 100% in 3 min)**

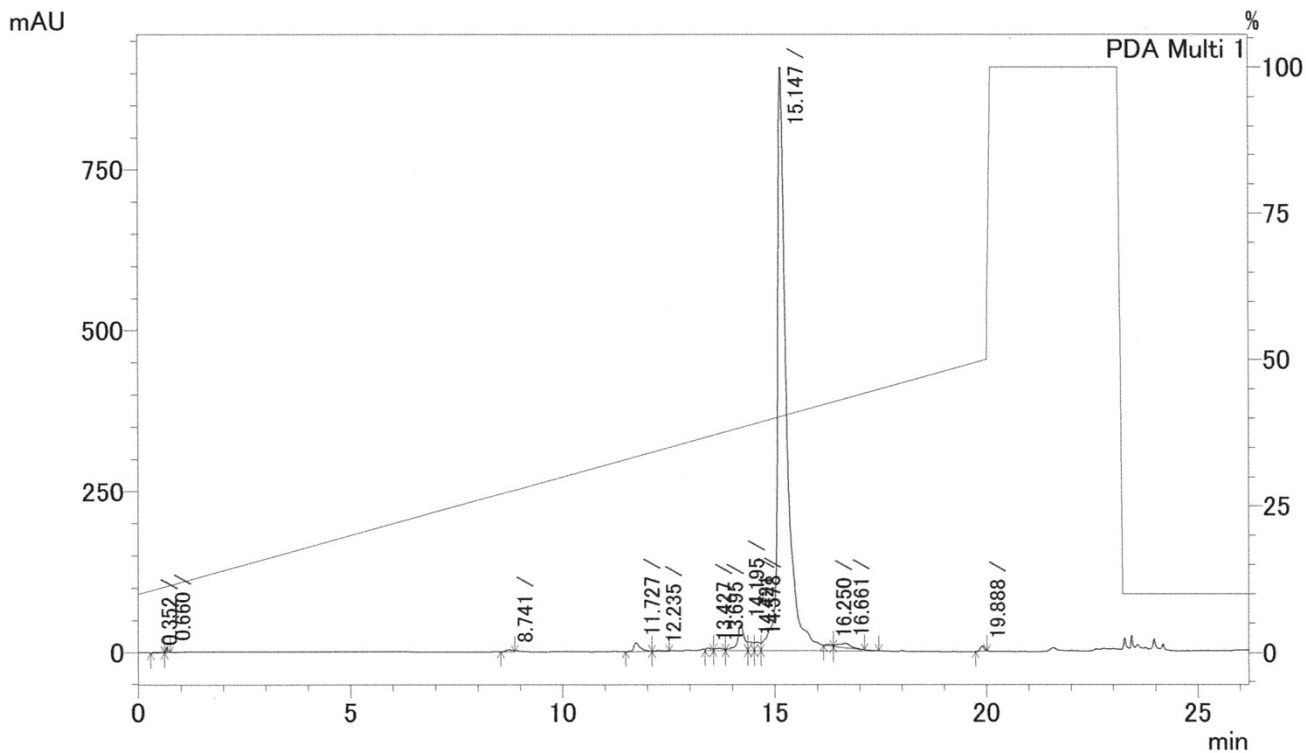

**ON-4d**

**HPLC (gradient condition: B% 10-50 % in 20 min, then 100% in 3 min)**

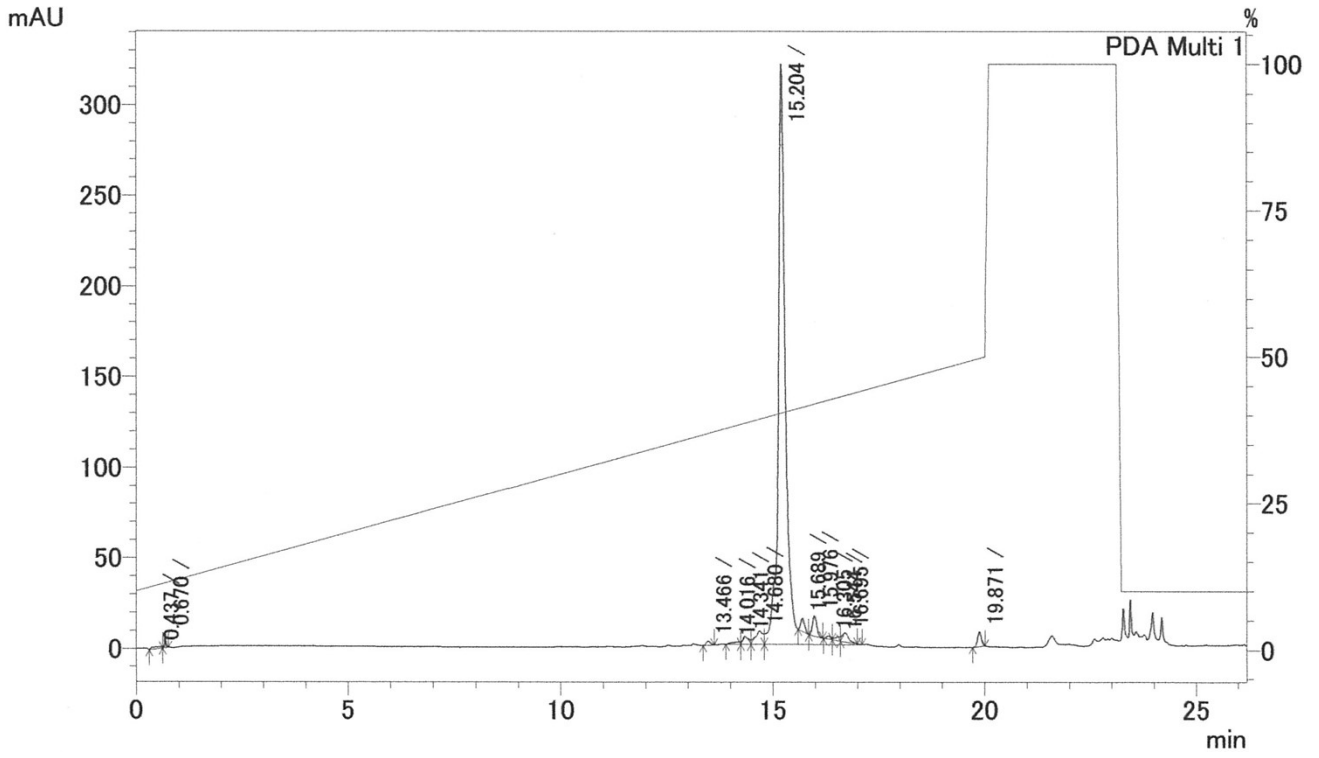

ON-5a

HPLC (gradient condition: B% 10-50 % in 20 min, then 100% in 3 min)

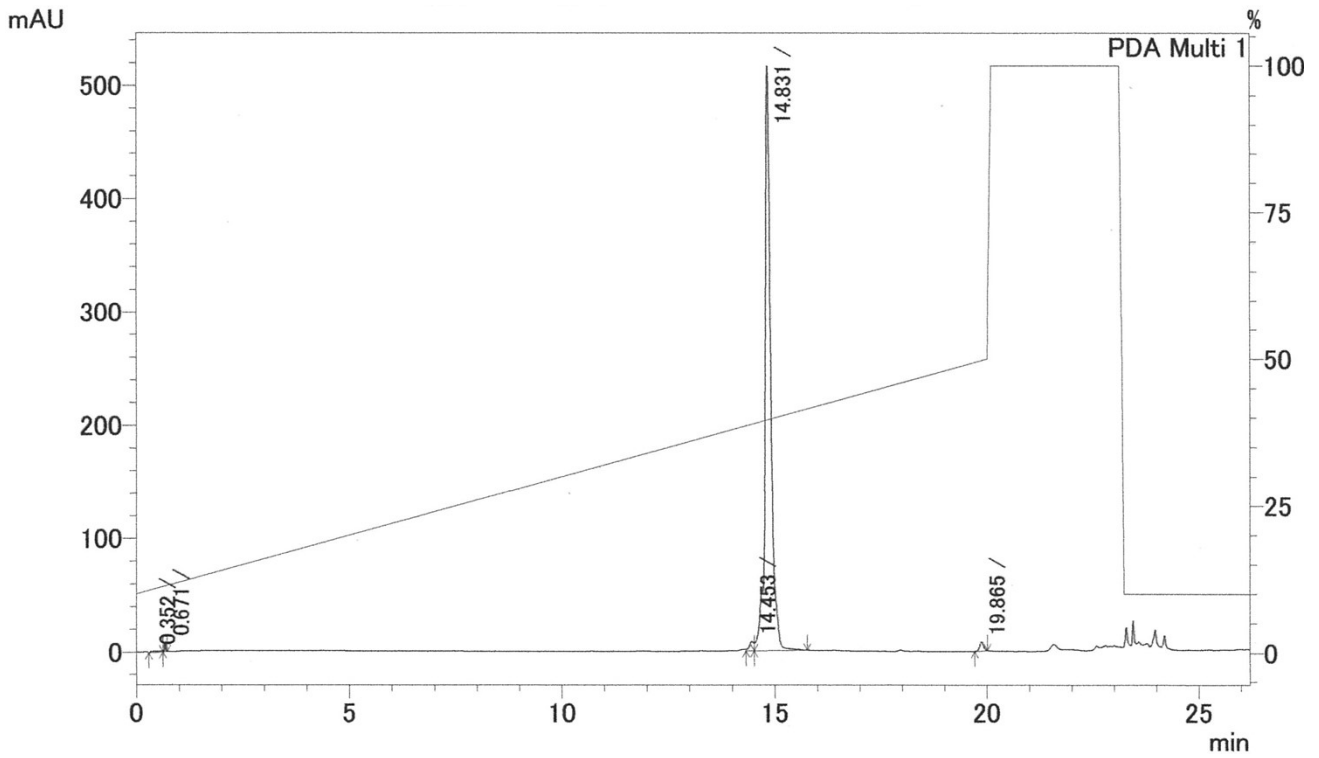

ON-5b

HPLC (gradient condition: B% 10-50 % in 20 min, then 100% in 3 min)

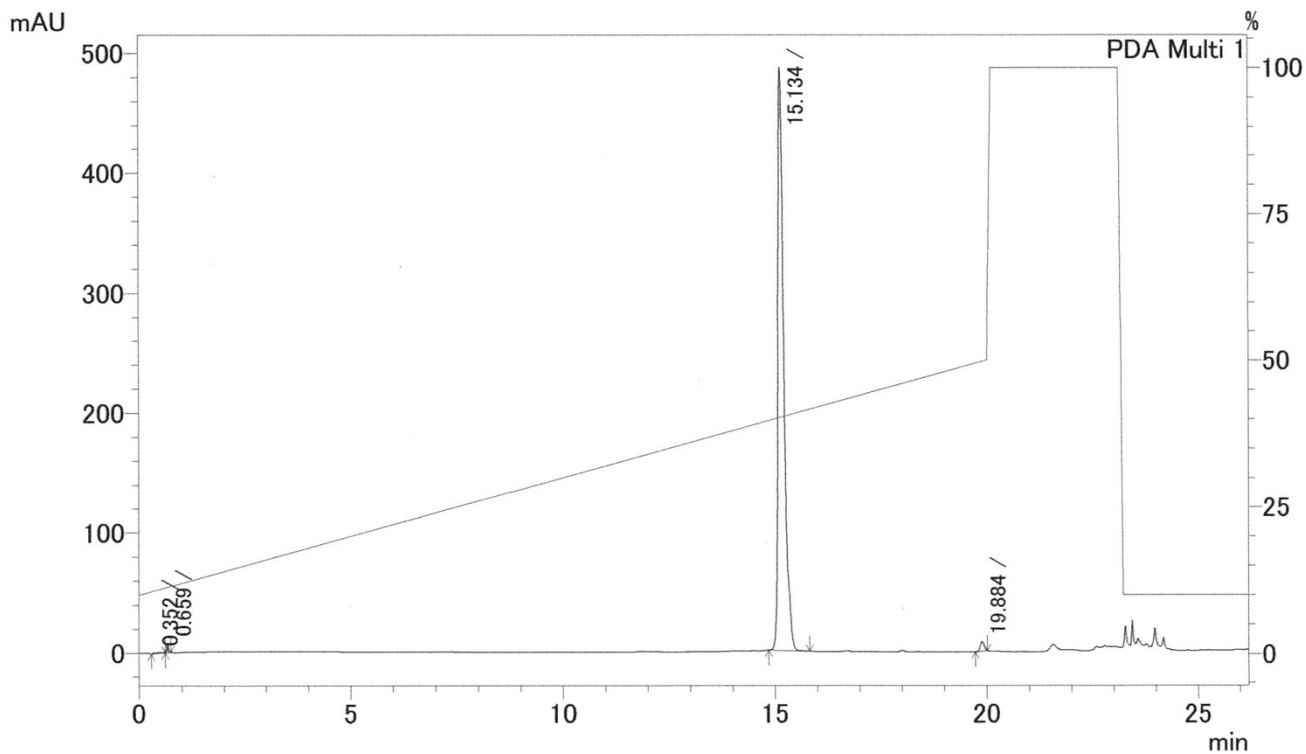

**ON-5d**

**HPLC (gradient condition: B% 10-50 % in 20 min, then 100% in 3 min)**

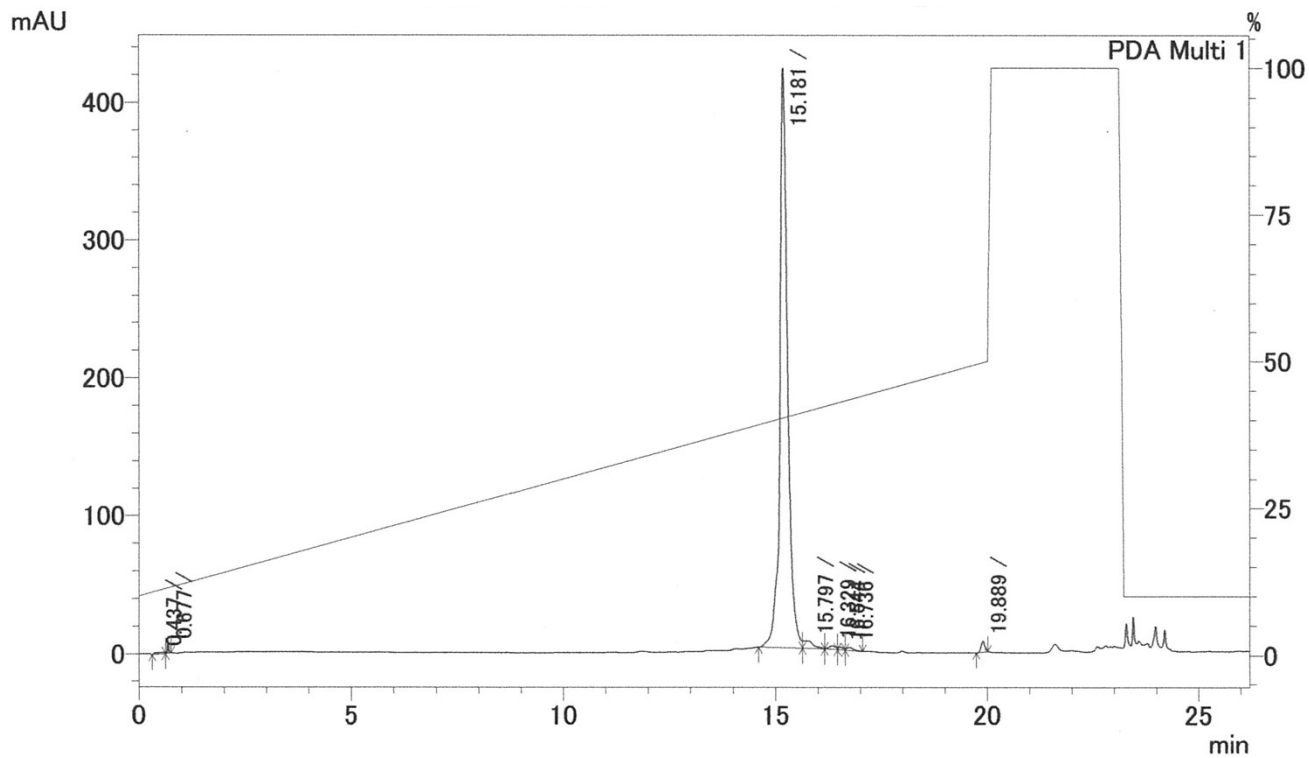

**ON-6a**

**HPLC (gradient condition: B% 5-50 % in 22.5 min, then 100% in 5 min)**

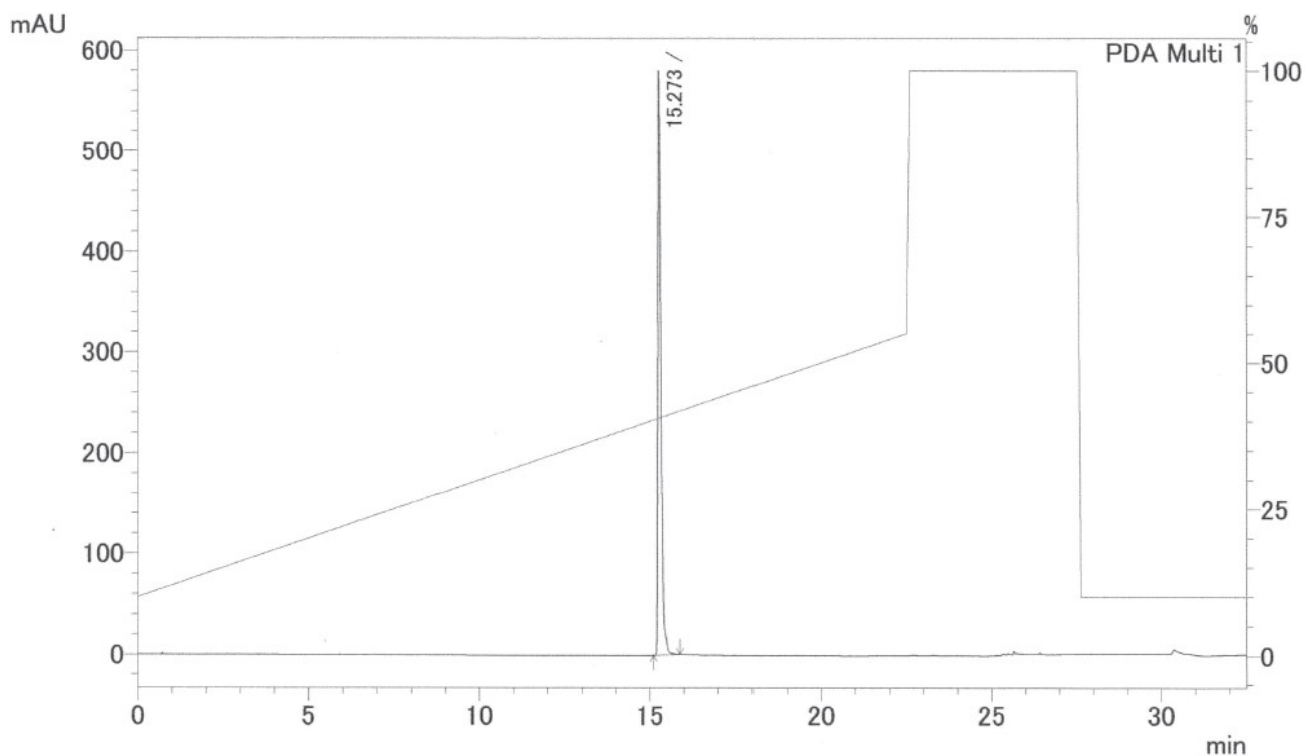

**ON-6b**

**HPLC (gradient condition: B% 5-50 % in 22.5 min, then 100% in 5 min)**

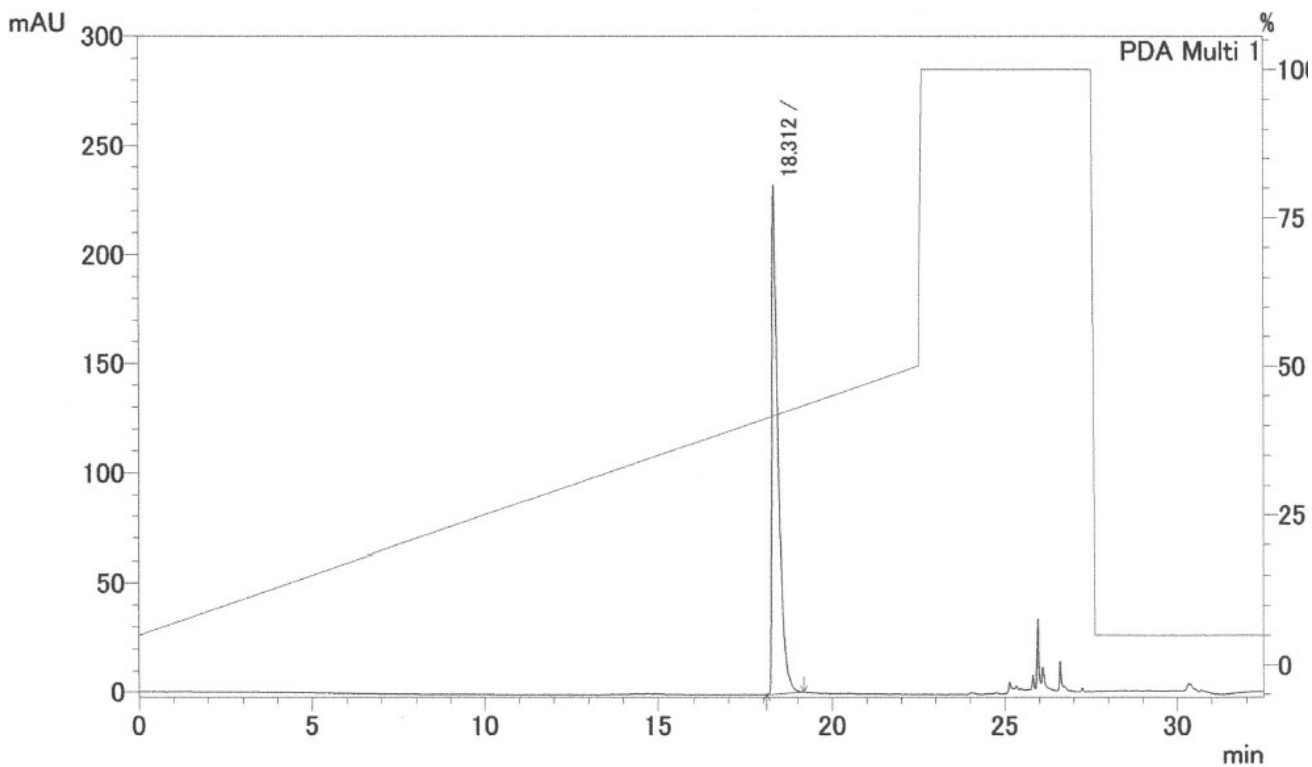

**ON-6c**

**HPLC (gradient condition: B% 10-50 % in 20 min, then 100% in 3 min)**

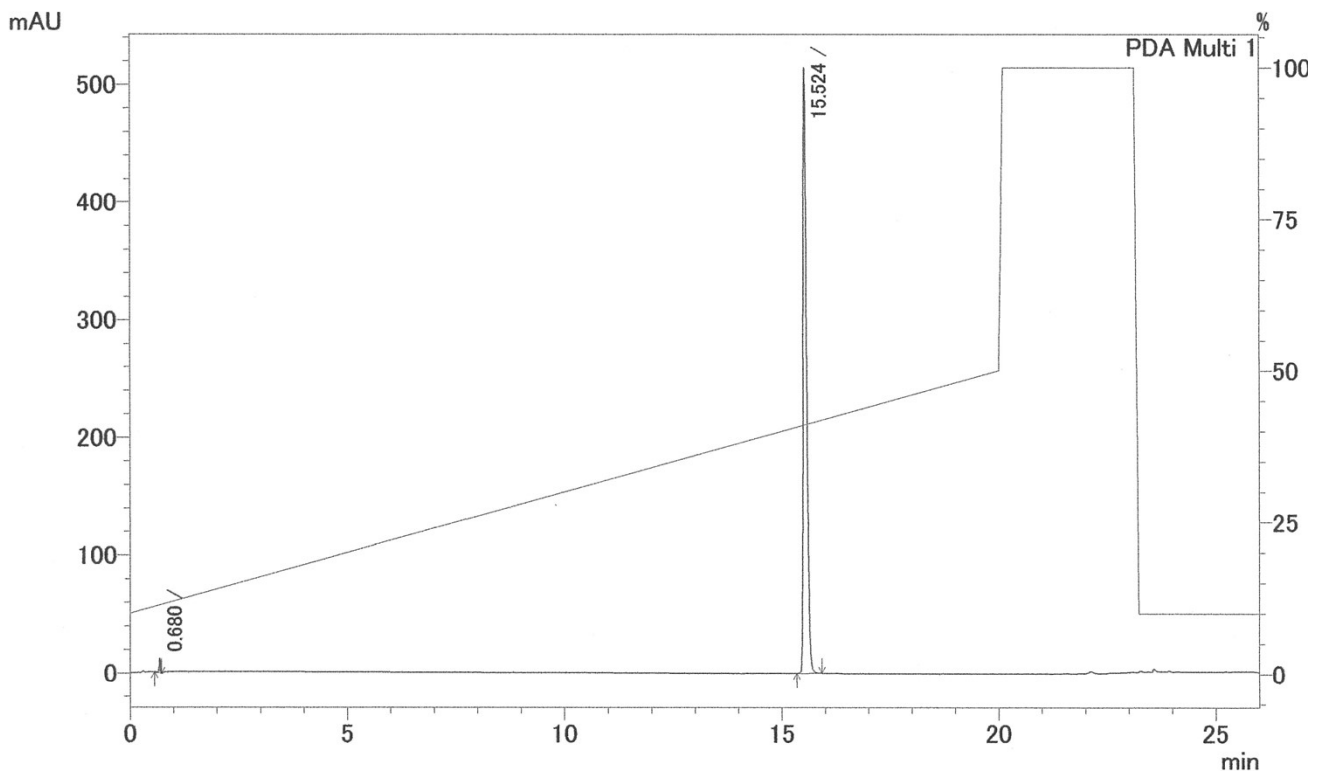

**ON-6d**

**HPLC (gradient condition: B% 5-50 % in 22.5 min, then 100% in 5 min)**

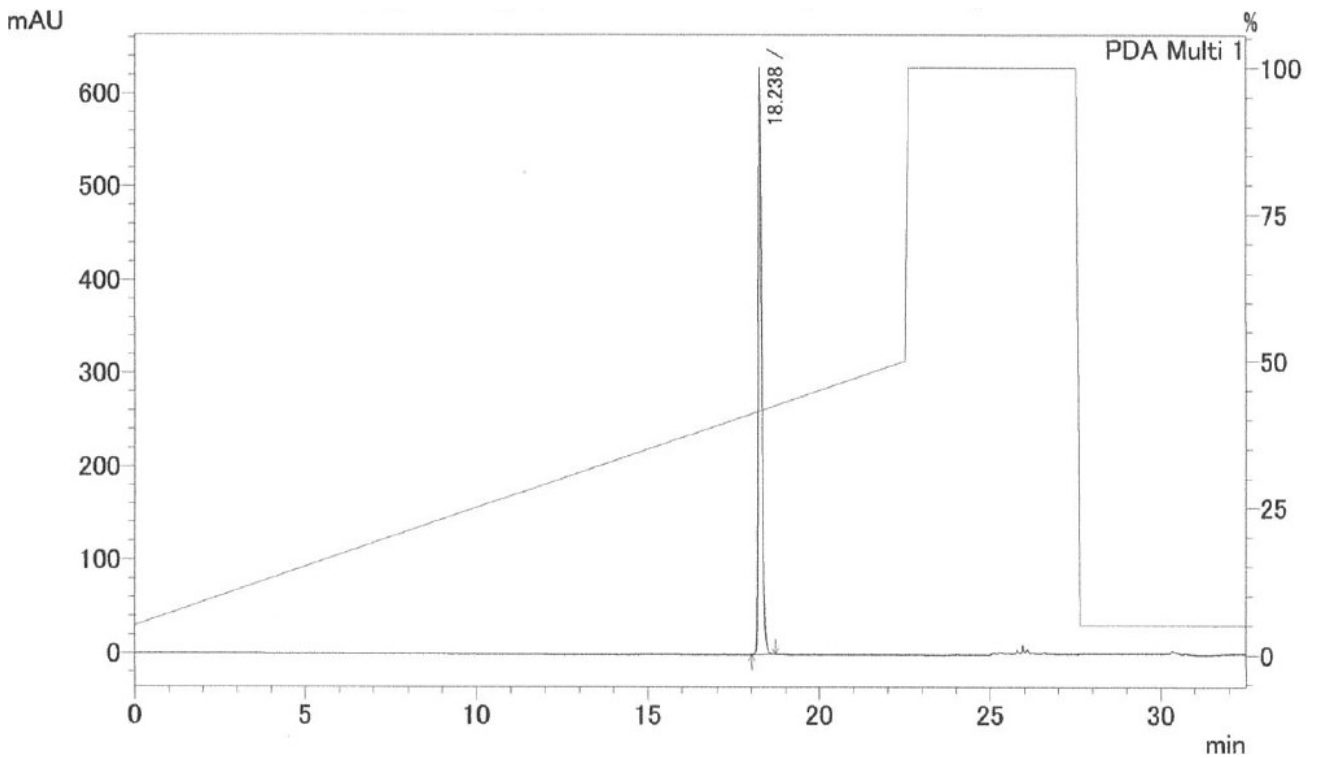

**ON-6e**

**HPLC (gradient condition: B% 5-60 % in 22.5 min, then 100% in 5 min)**



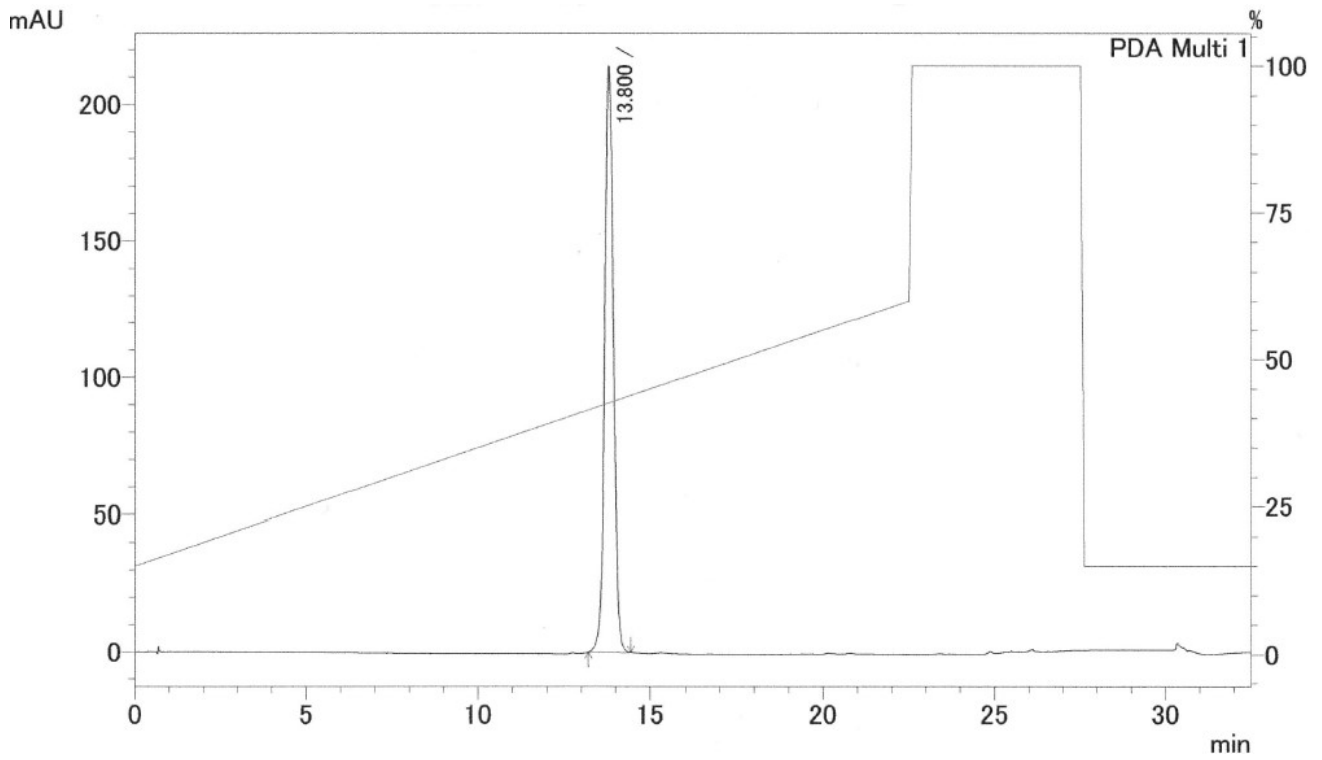

**Mass chart of ON-1 (DNA)\* (MALDI-TOF, Bulker) \* purchased from Gene Design**

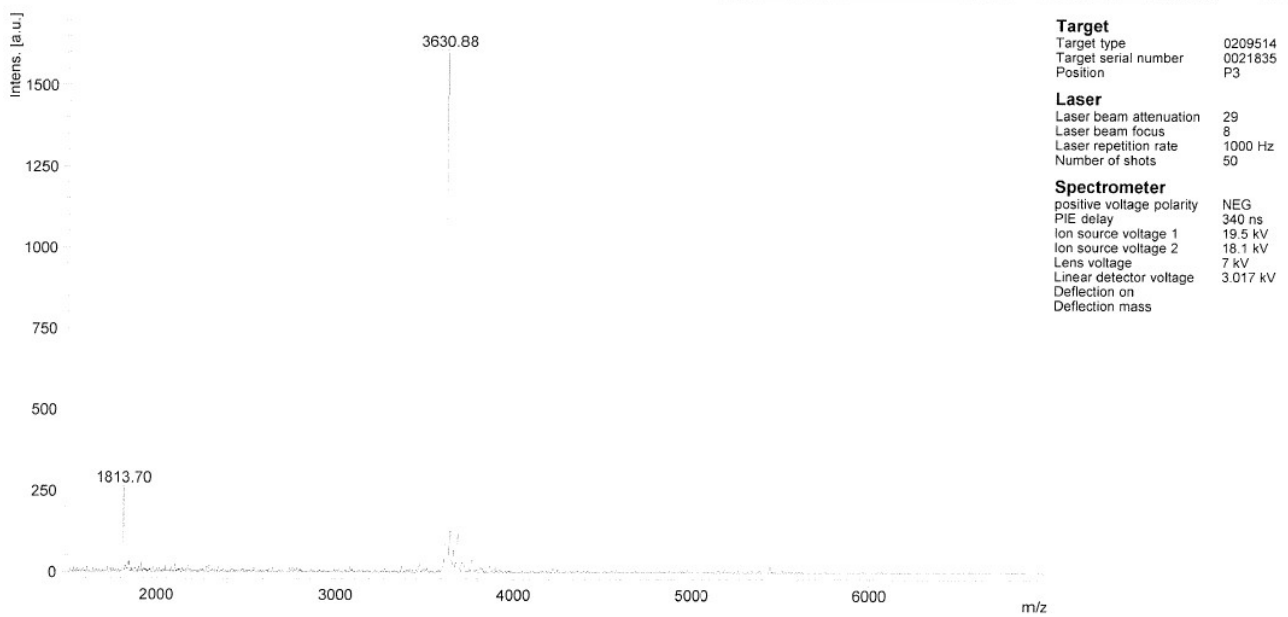

**Mass chart of ON-1 (LNA)\* (MALDI-TOF, Bulker) \*purchased from Gene Design**

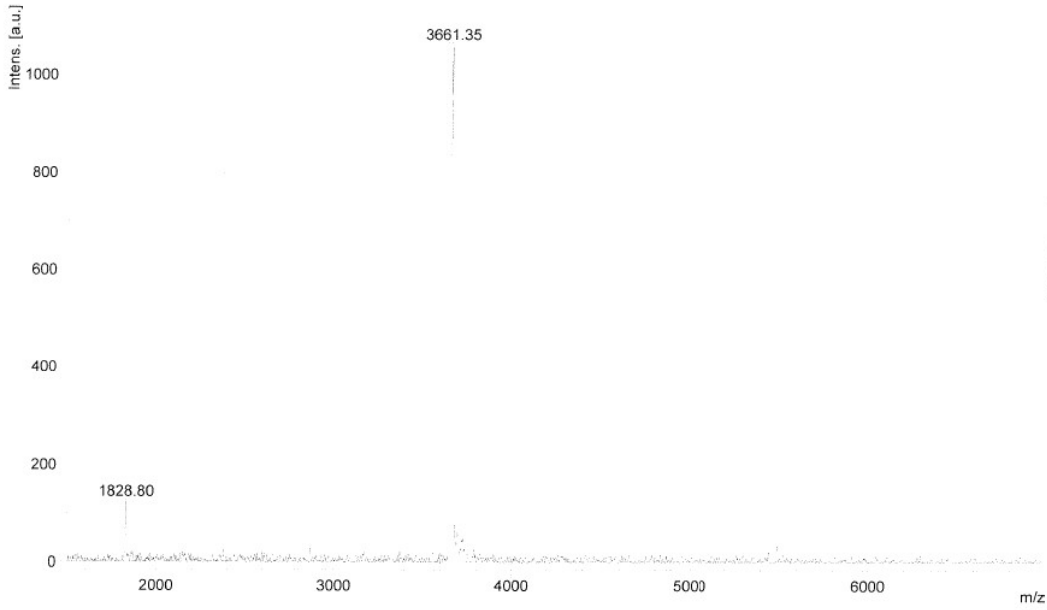

**Target**  
 Target type 0209514  
 Target serial number 0021835  
 Position P4

**Laser**  
 Laser beam attenuation 20  
 Laser beam focus 8  
 Laser repetition rate 1000 Hz  
 Number of shots 100

**Spectrometer**  
 positive voltage polarity NEG  
 PIE delay 340 ns  
 Ion source voltage 1 19.5 kV  
 Ion source voltage 2 18.1 kV  
 Lens voltage 7 kV  
 Linear detector voltage 3.017 kV  
 Deflection on  
 Deflection mass

**Mass chart of ON-1a (Q-ToF, Xevo G2-XS System, Waters)**

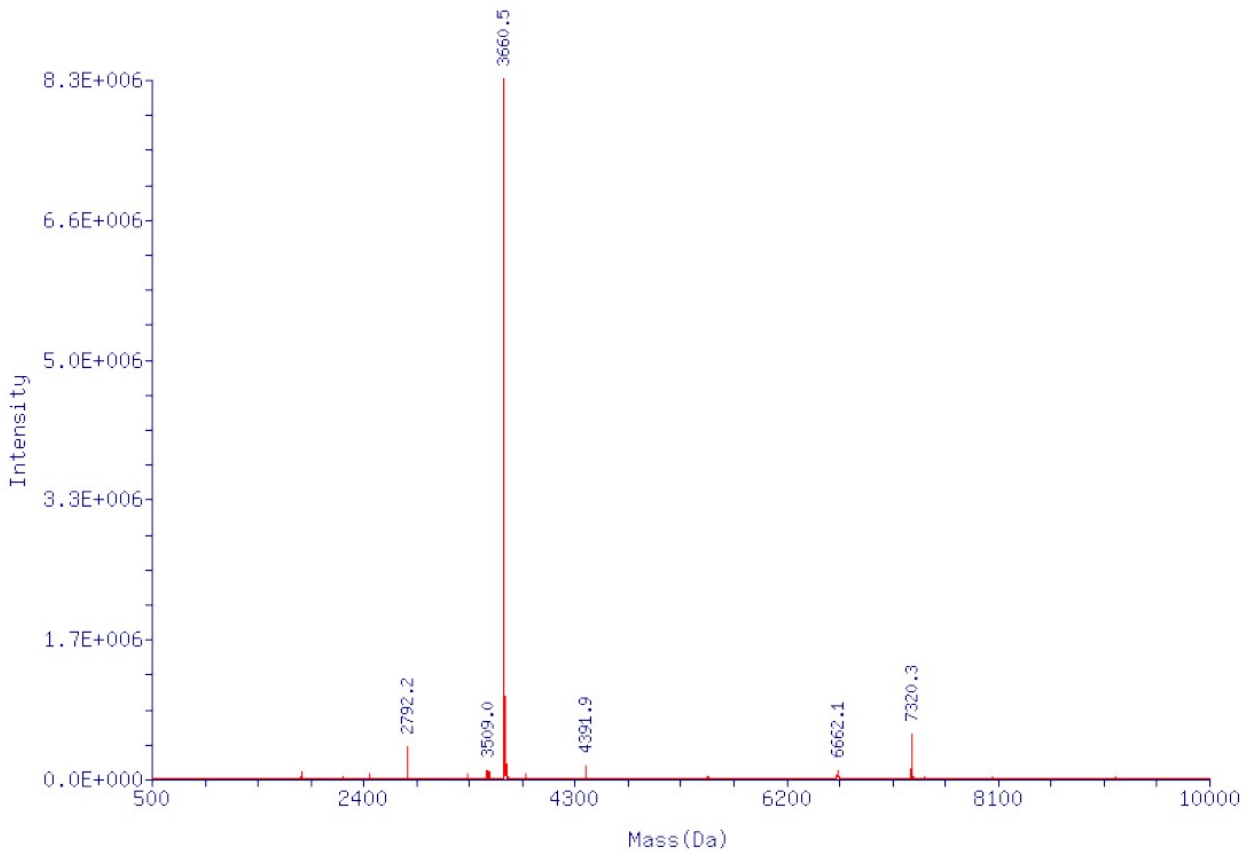

Mass chart of ON-1b (ESI, ZQ mass detector, Waters)

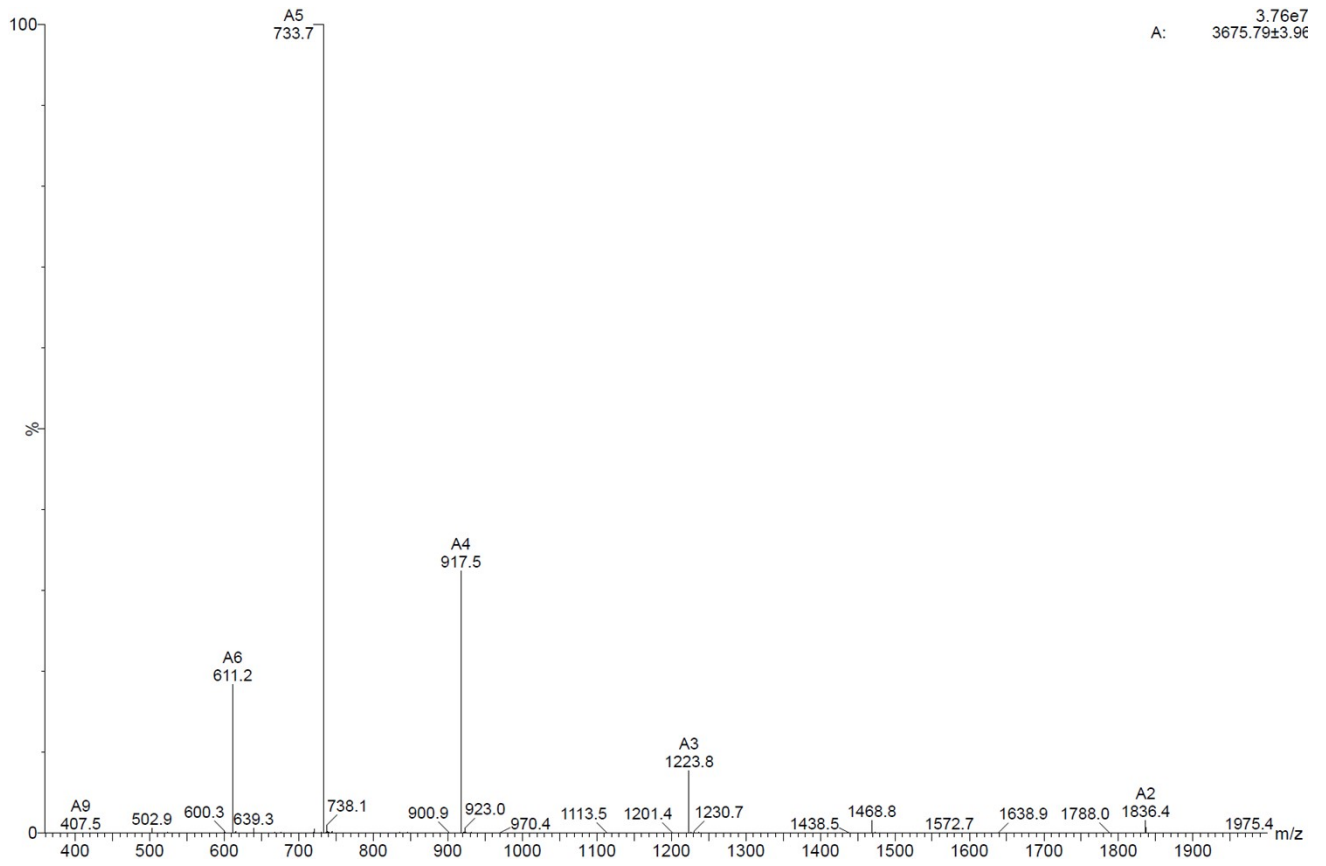

A: 3.76e7  
3675.79±3.96

Mass chart of ON-1c (Q-ToF, Xevo G2-XS System, Waters)

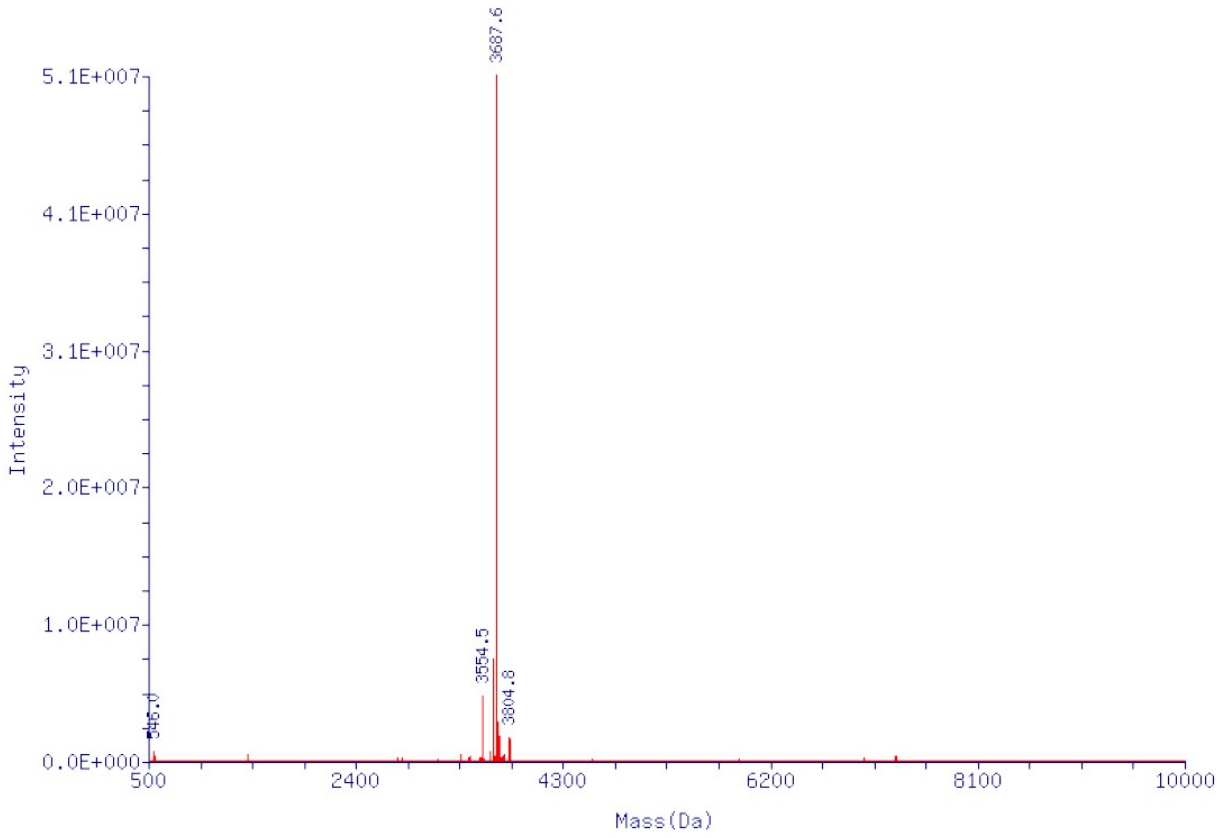

Mass chart of ON-1d (Q-ToF, Xevo G2-XS System, Waters)

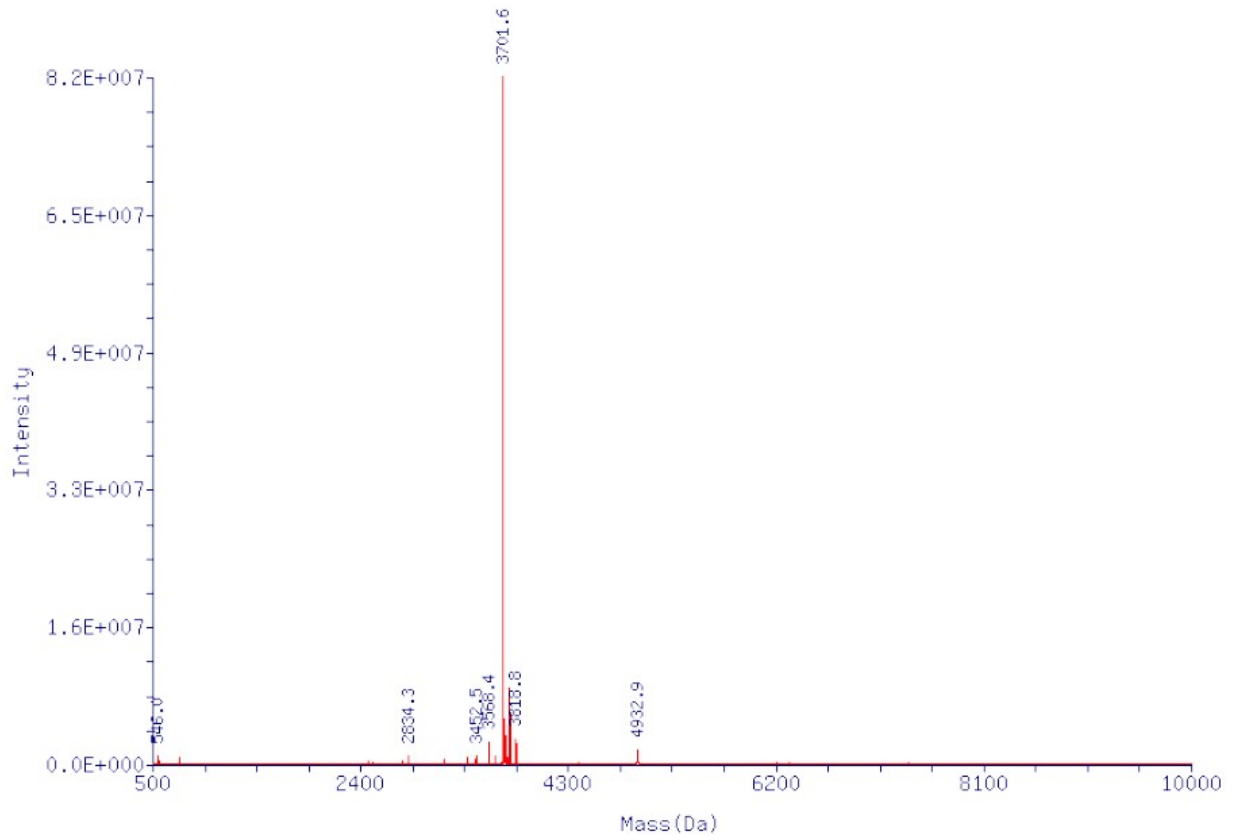

Mass chart of ON-1e (Q-ToF, Xevo G2-XS System, Waters)

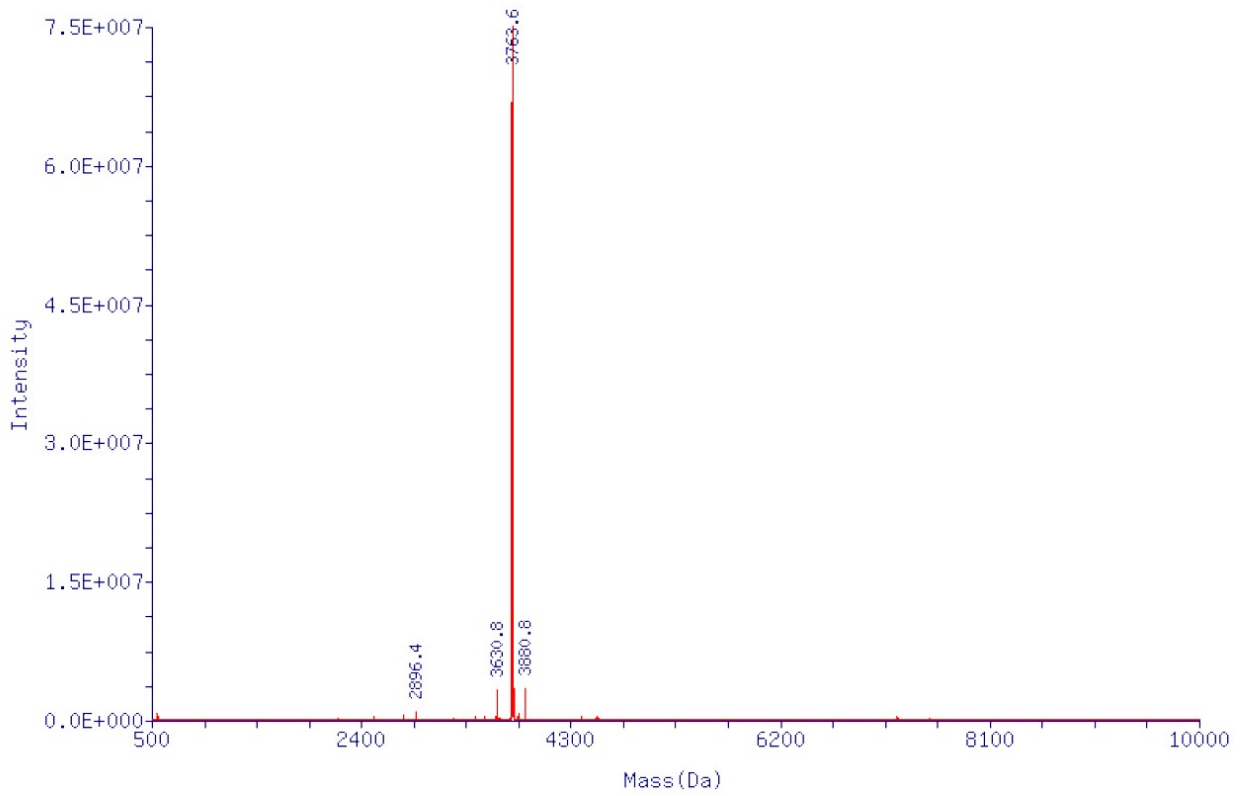

Mass chart of ON-2(LNA) (ESI, ZQ mass detector, Waters)

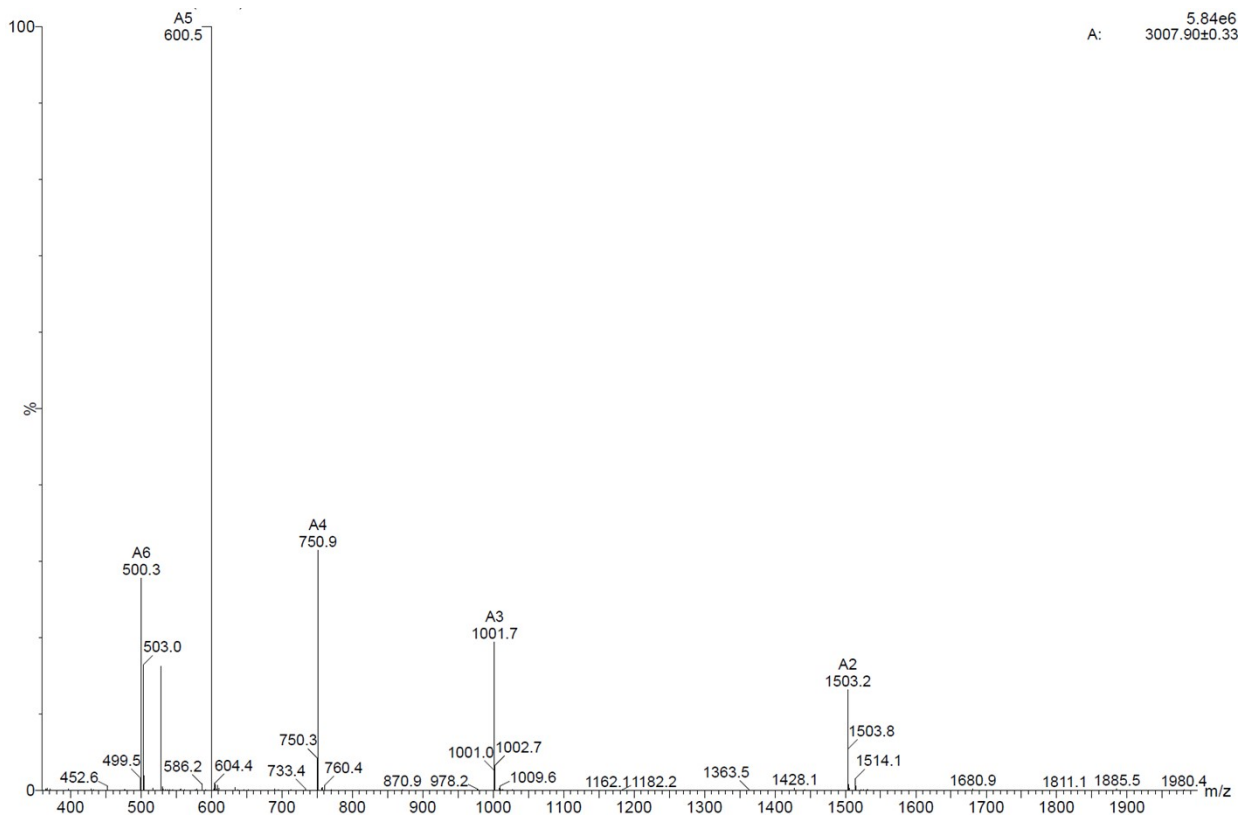

Mass chart of ON-2a (Q-ToF, Xevo G2-XS System, Waters)

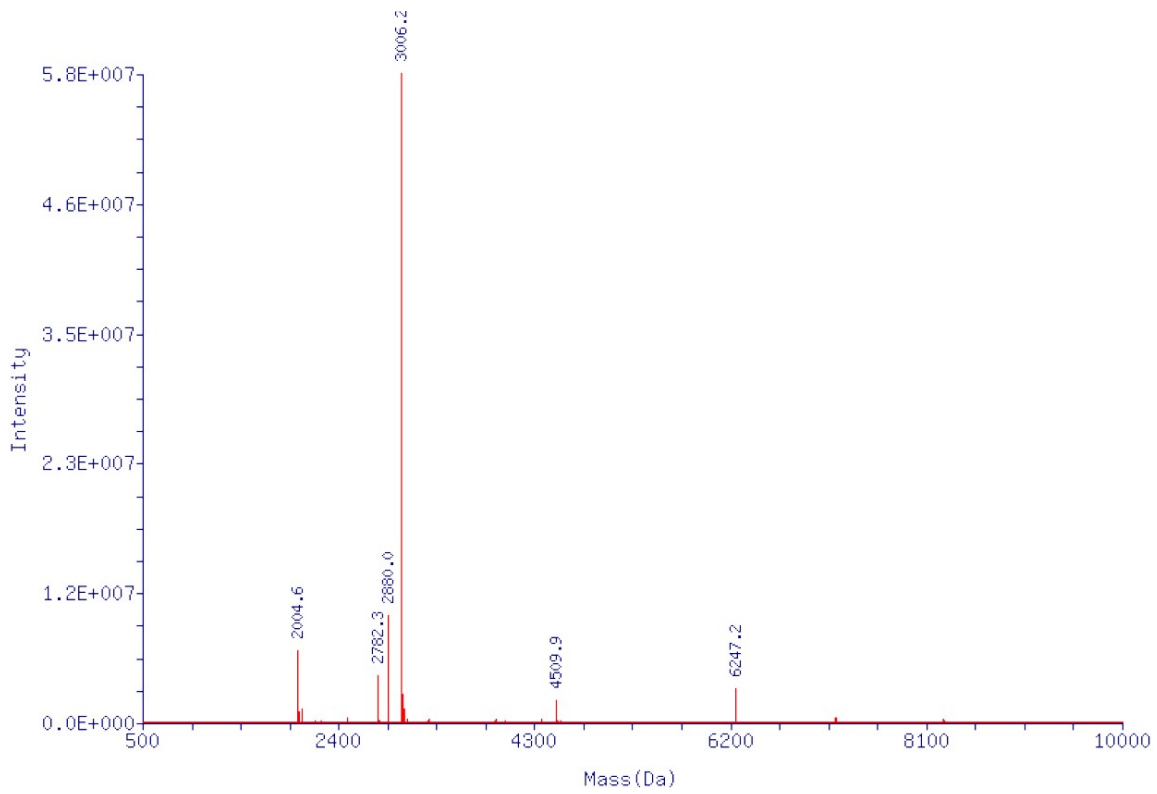

Mass chart of ON-2b (ESI, ZQ mass detector, Waters)

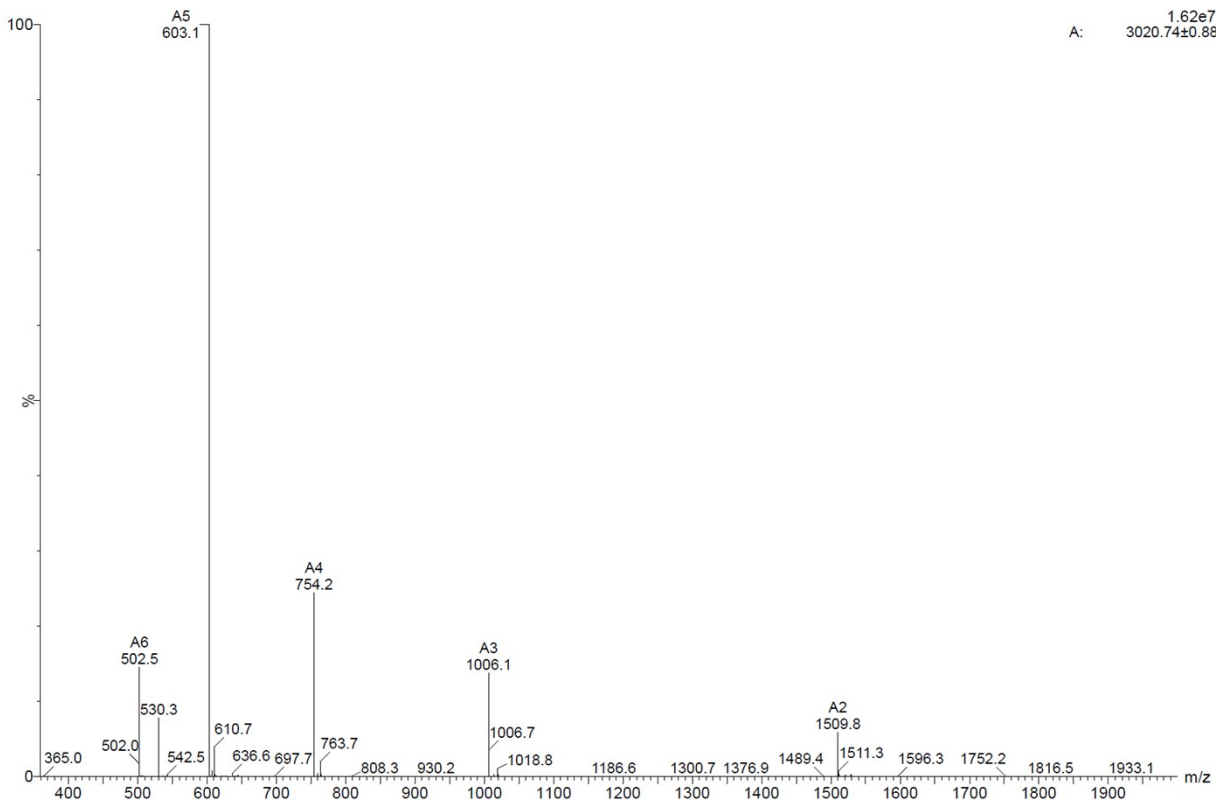

Mass chart of ON-2c (Q-ToF, Xevo G2-XS System, Waters)

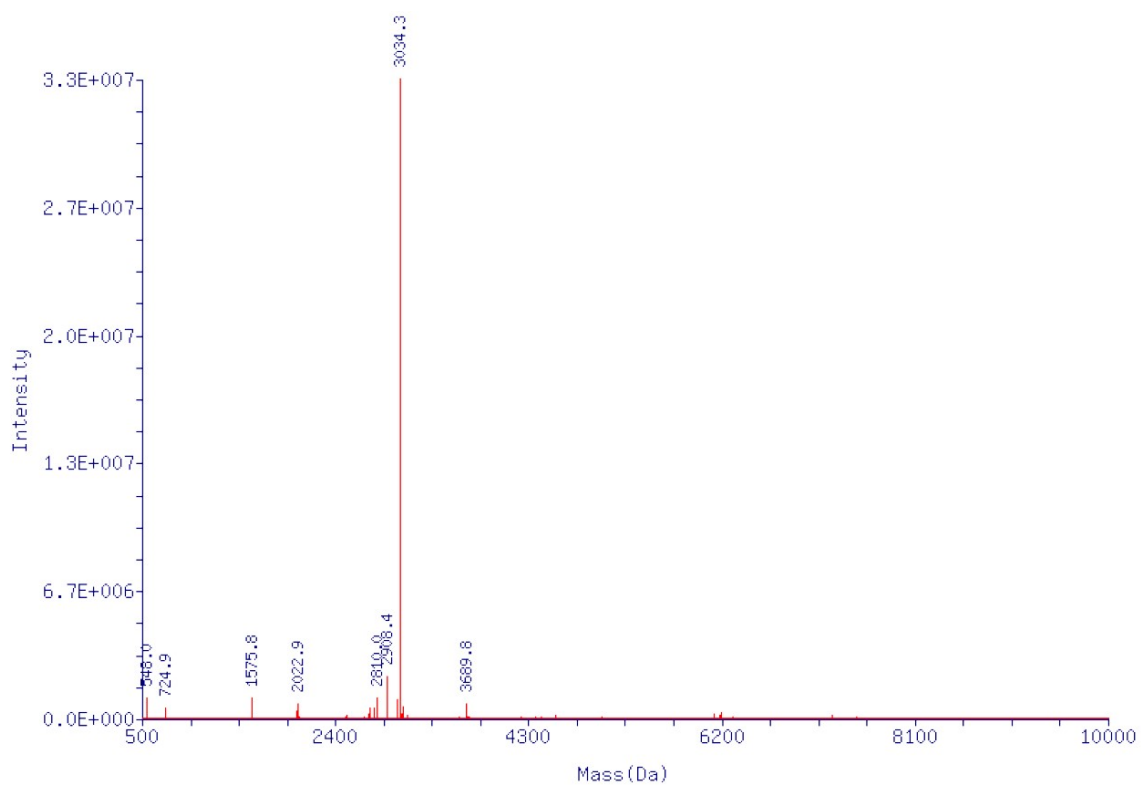

Mass chart of ON-2d (Q-ToF, Xevo G2-XS System, Waters)

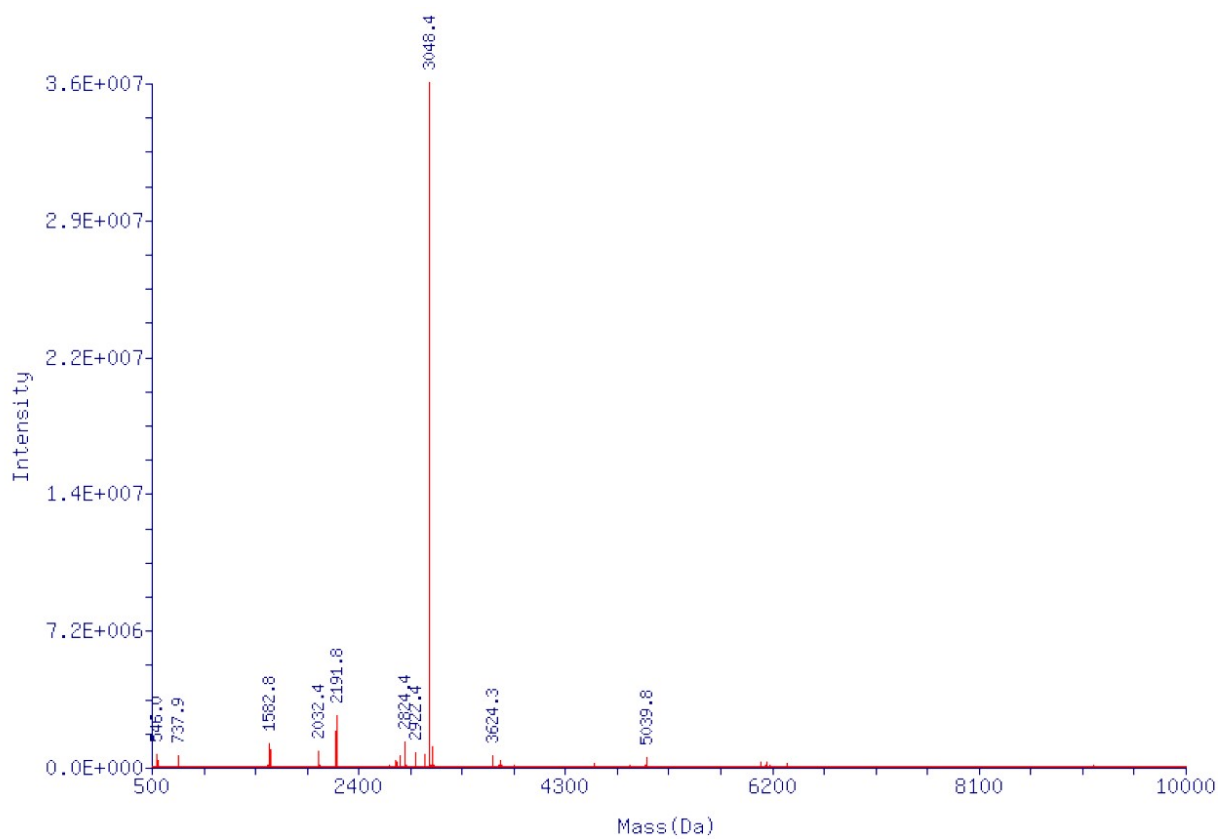

Mass chart of ON-2e (Q-ToF, Xevo G2-XS System, Waters)

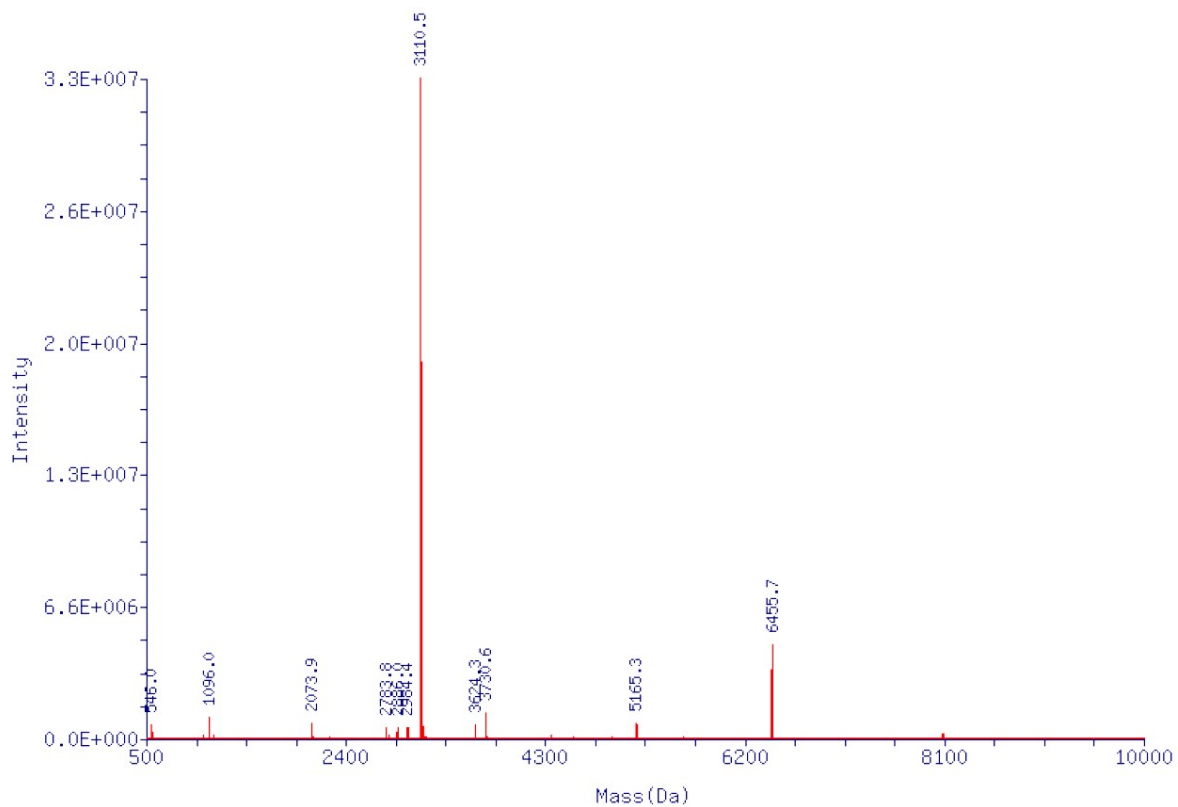

Mass chart of ON-3a (Q-ToF, Xevo G2-XS System, Waters)

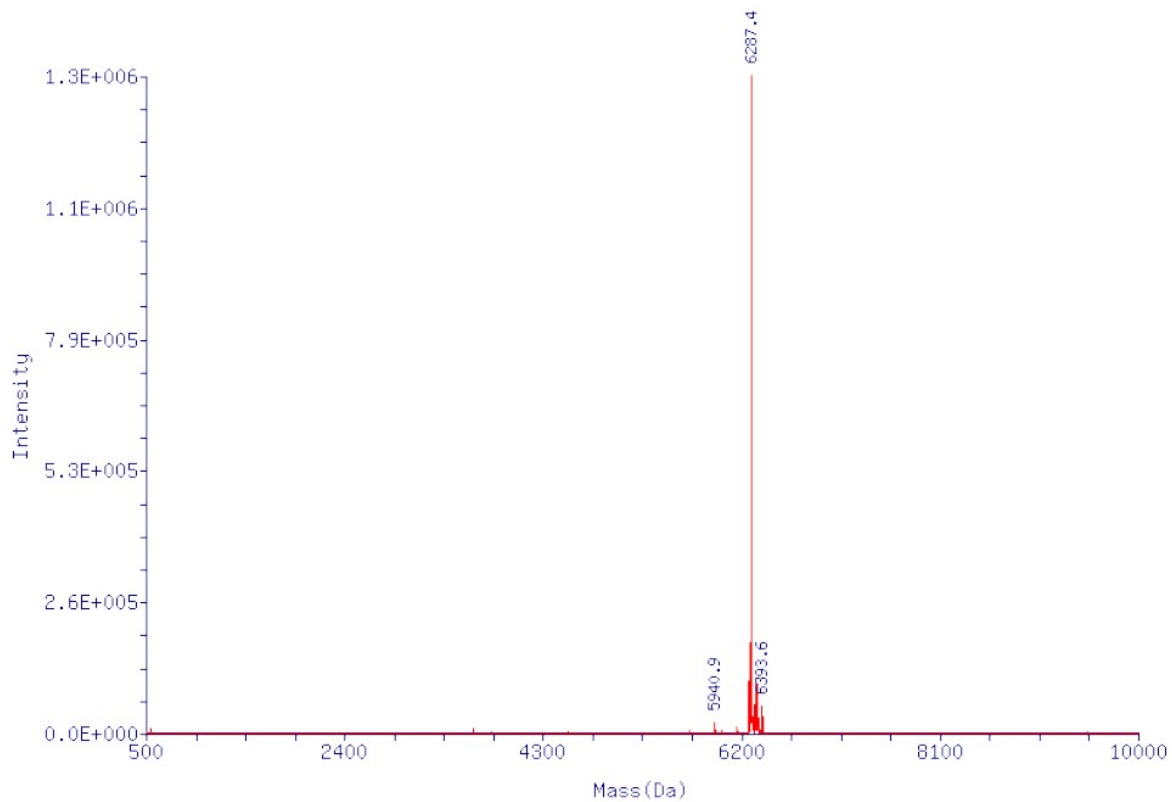

Mass chart of ON-3b (Q-ToF, Xevo G2-XS System, Waters)



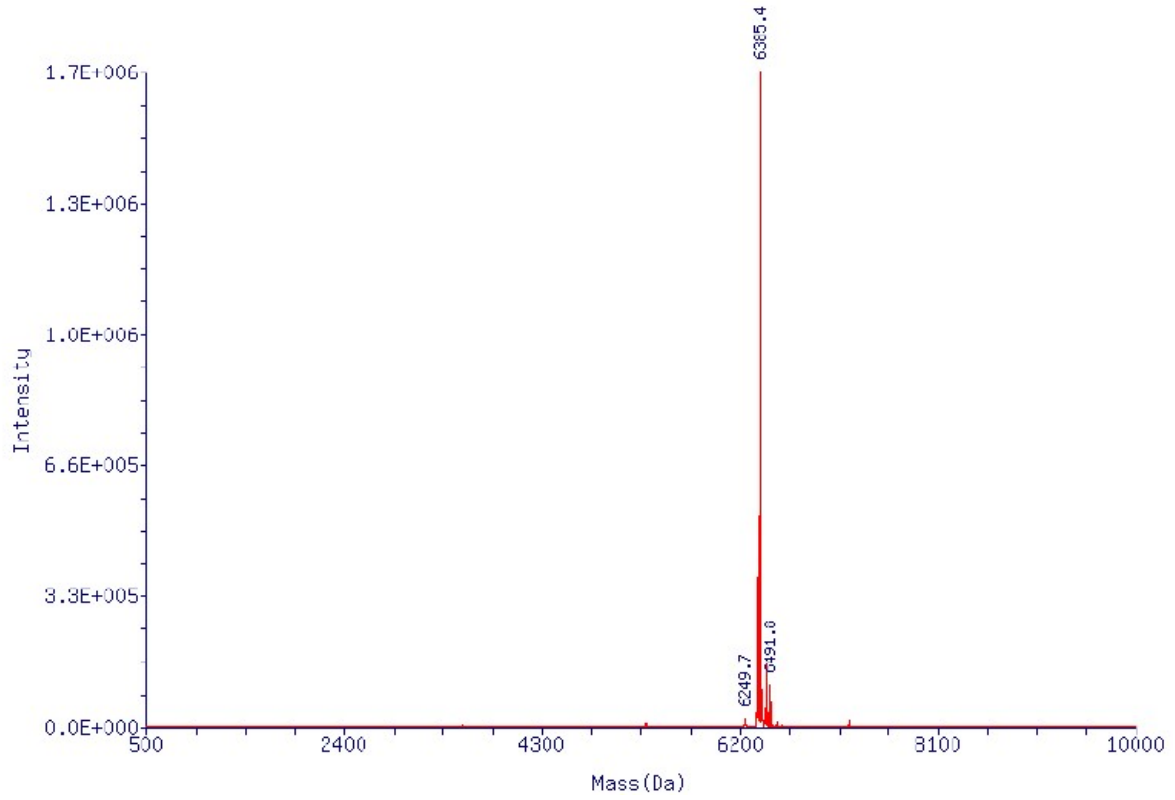

Mass chart of ON-3b (Q-ToF, Xevo G2-XS System, Waters)

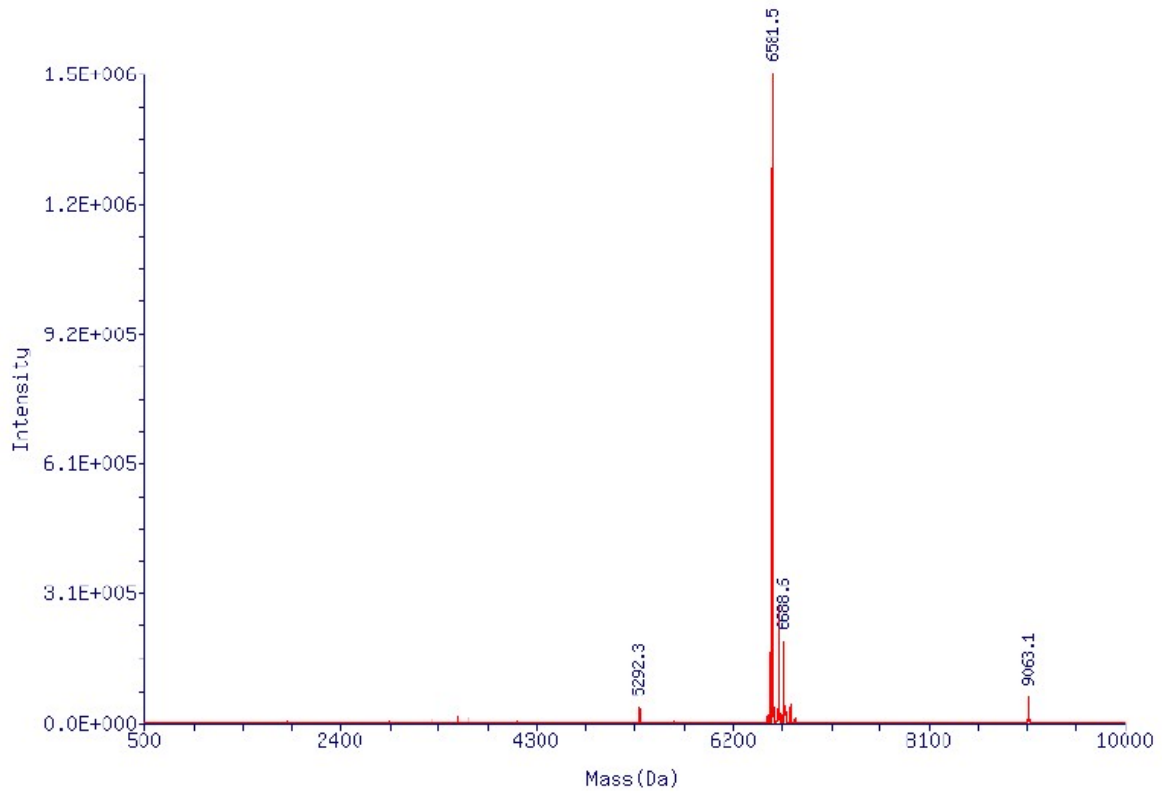

Mass chart of ON-4a (Q-ToF, Xevo G2-XS System, Waters)

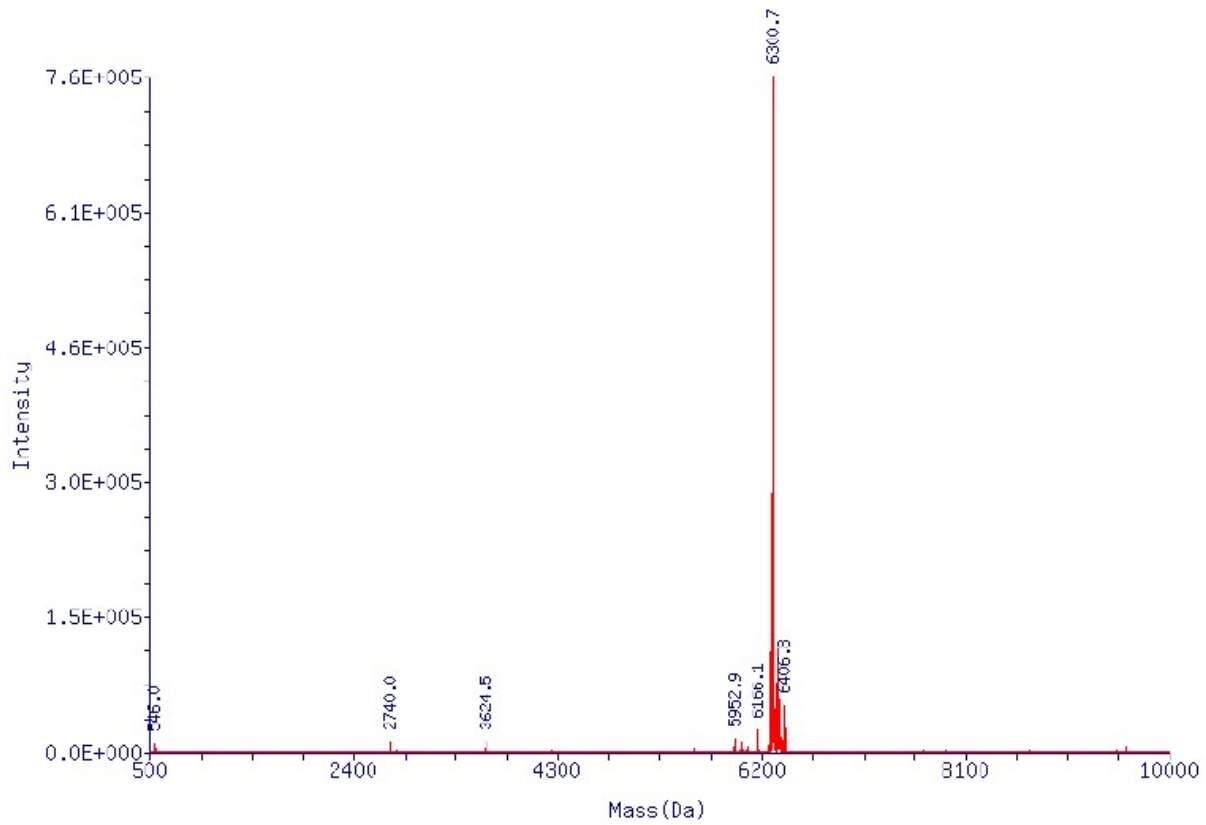

Mass chart of ON-4b (Q-ToF, Xevo G2-XS System, Waters)

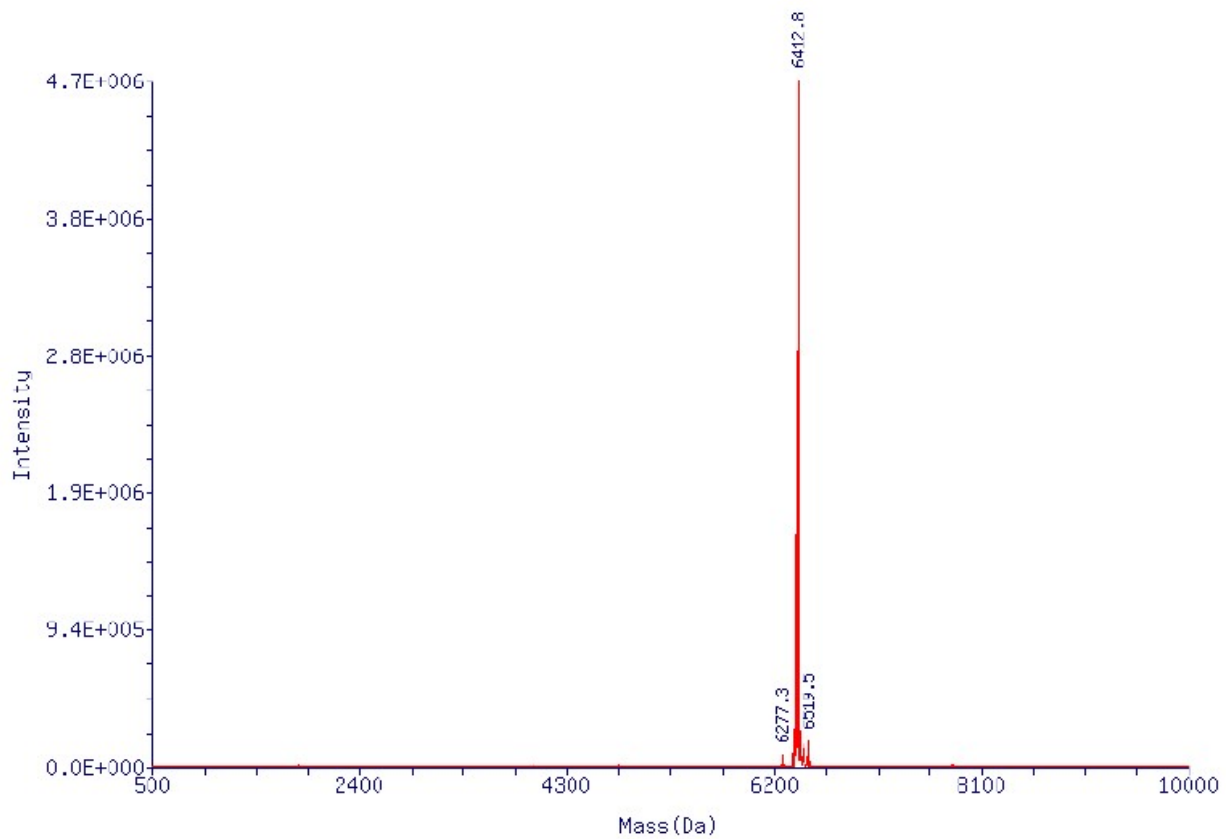

Mass chart of ON-4d (Q-ToF, Xevo G2-XS System, Waters)

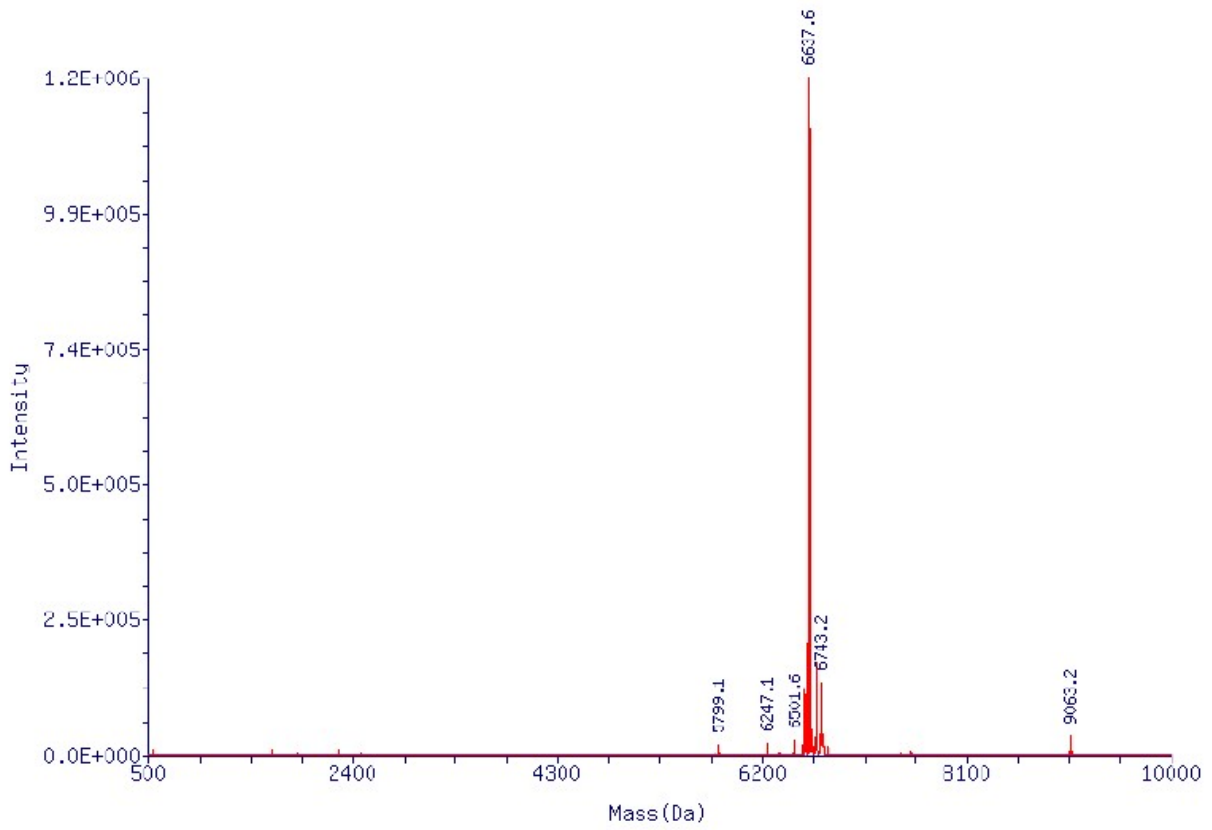

Mass chart of ON-5a (Q-ToF, Xevo G2-XS System, Waters)

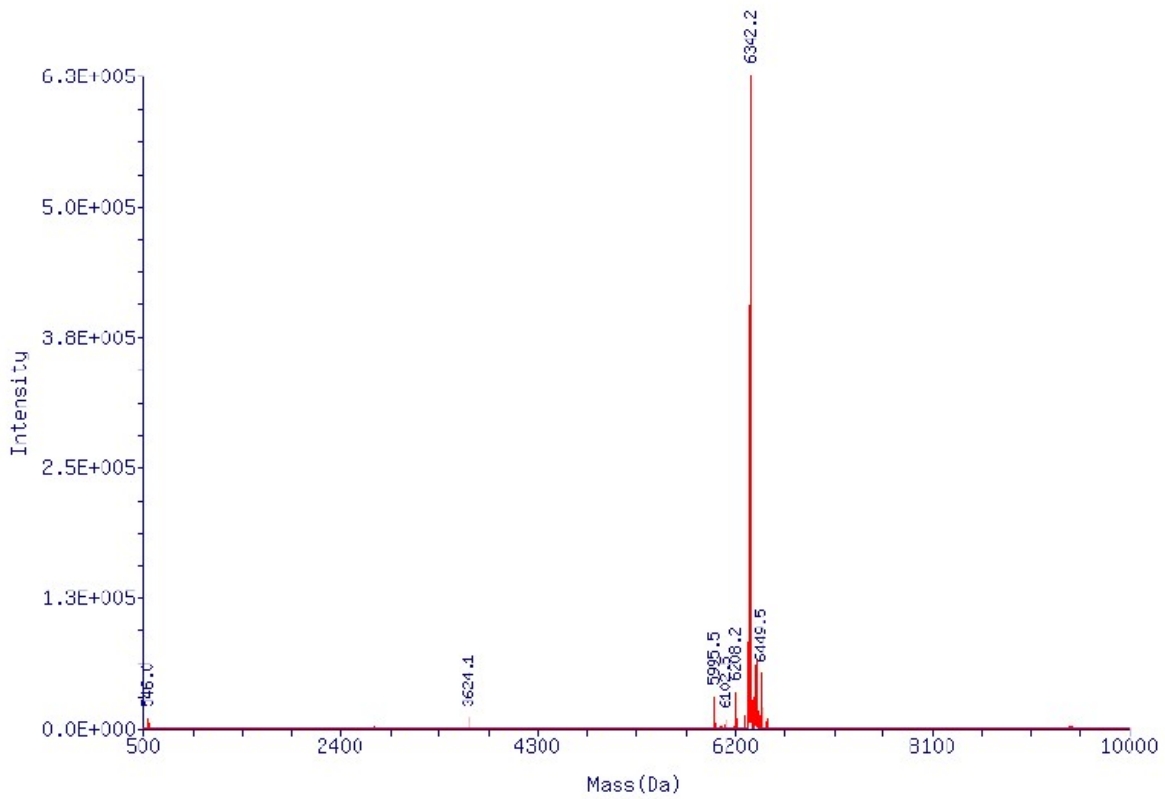

Mass chart of ON-5b (Q-Tof, Xevo G2-XS System, Waters)

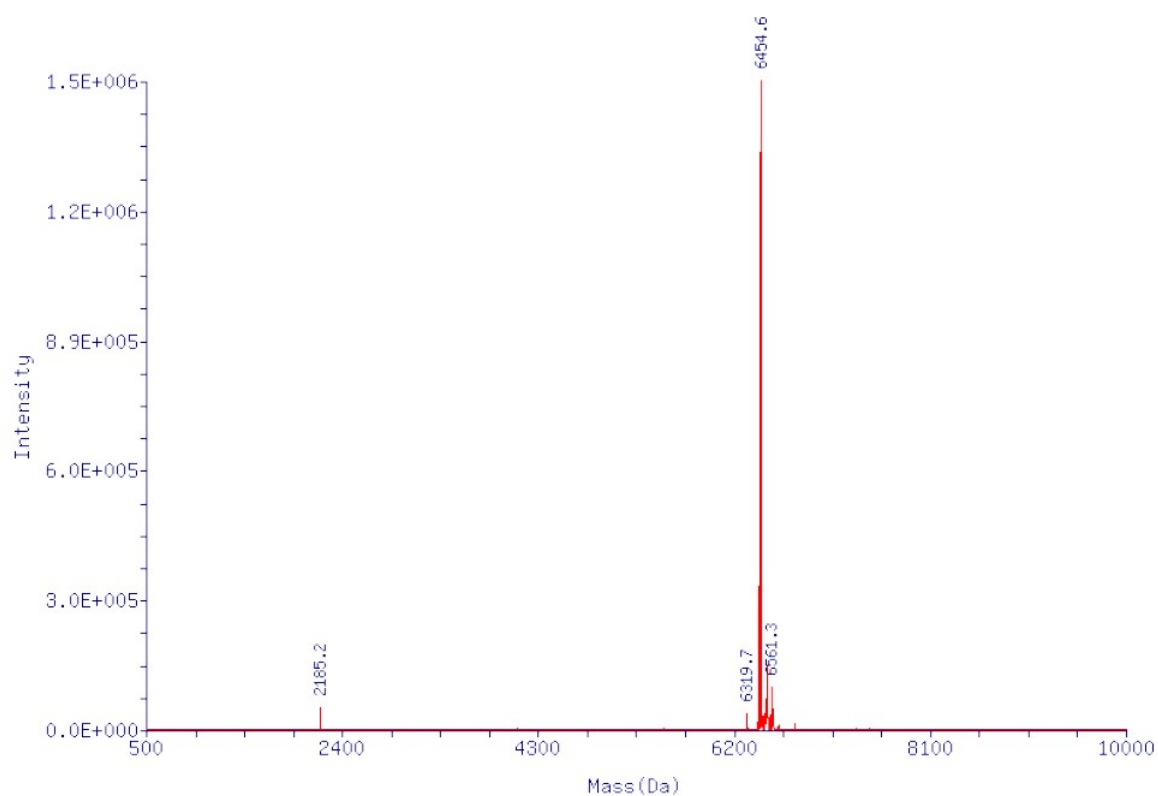

Mass chart of ON-5d (Q-Tof, Xevo G2-XS System, Waters)

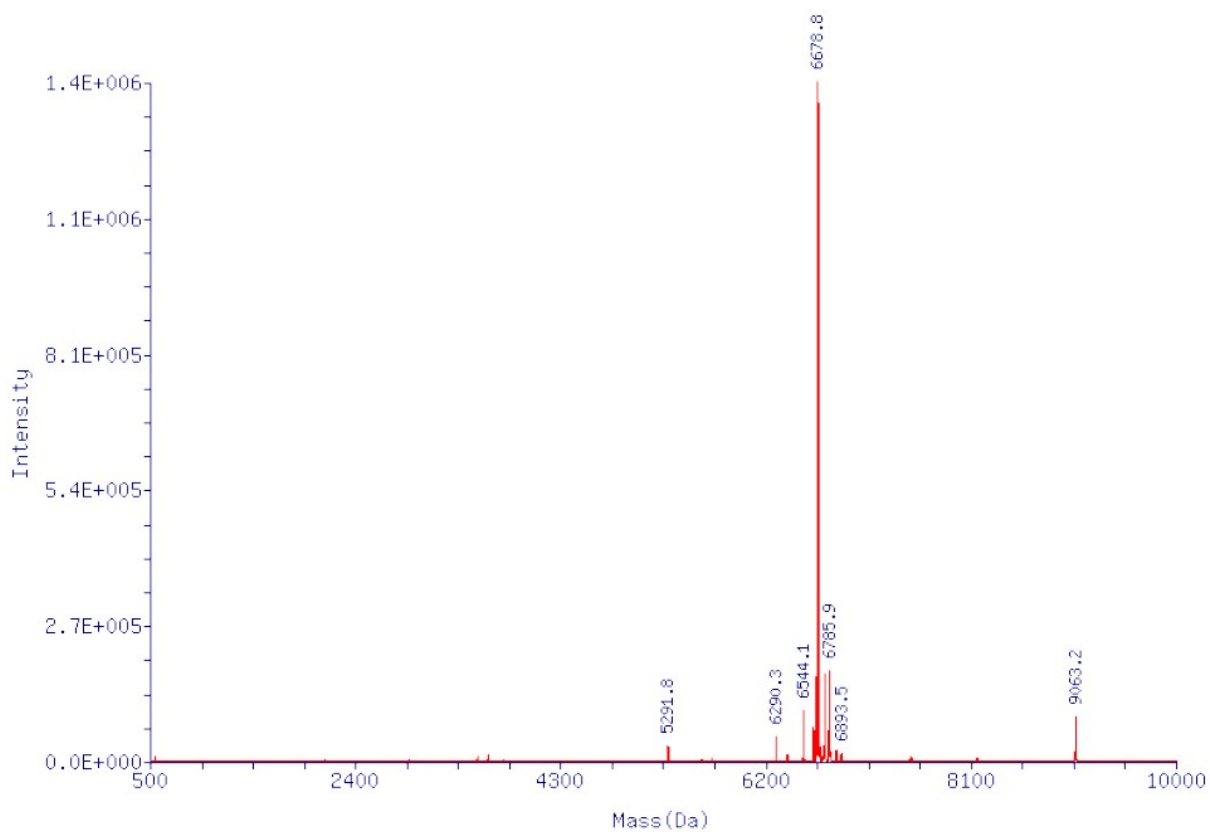

Mass chart of ON-6a (Q-ToF, Xevo G2-XS System, Waters)

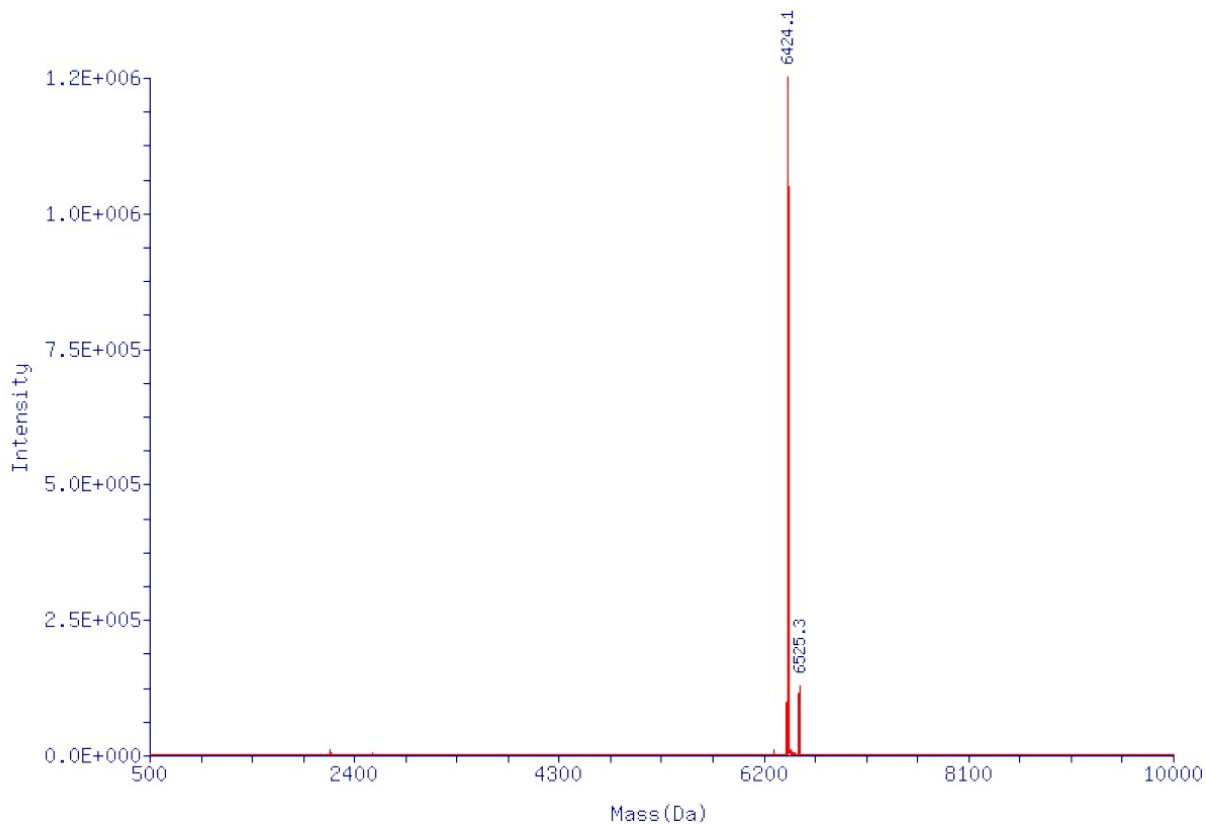

Mass chart of ON-6b (ESI, ZQ mass detector, Waters)

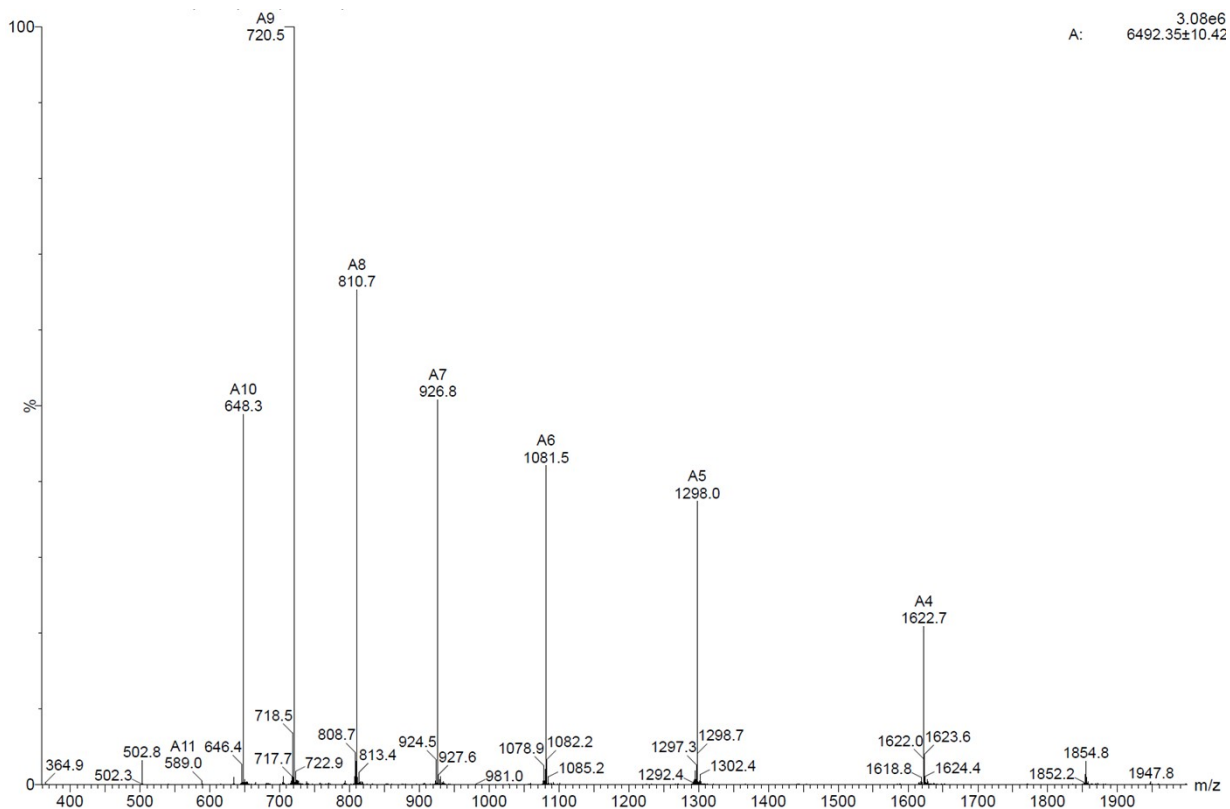

Mass chart of ON-6c (Q-Tof, Xevo G2-XS System, Waters)

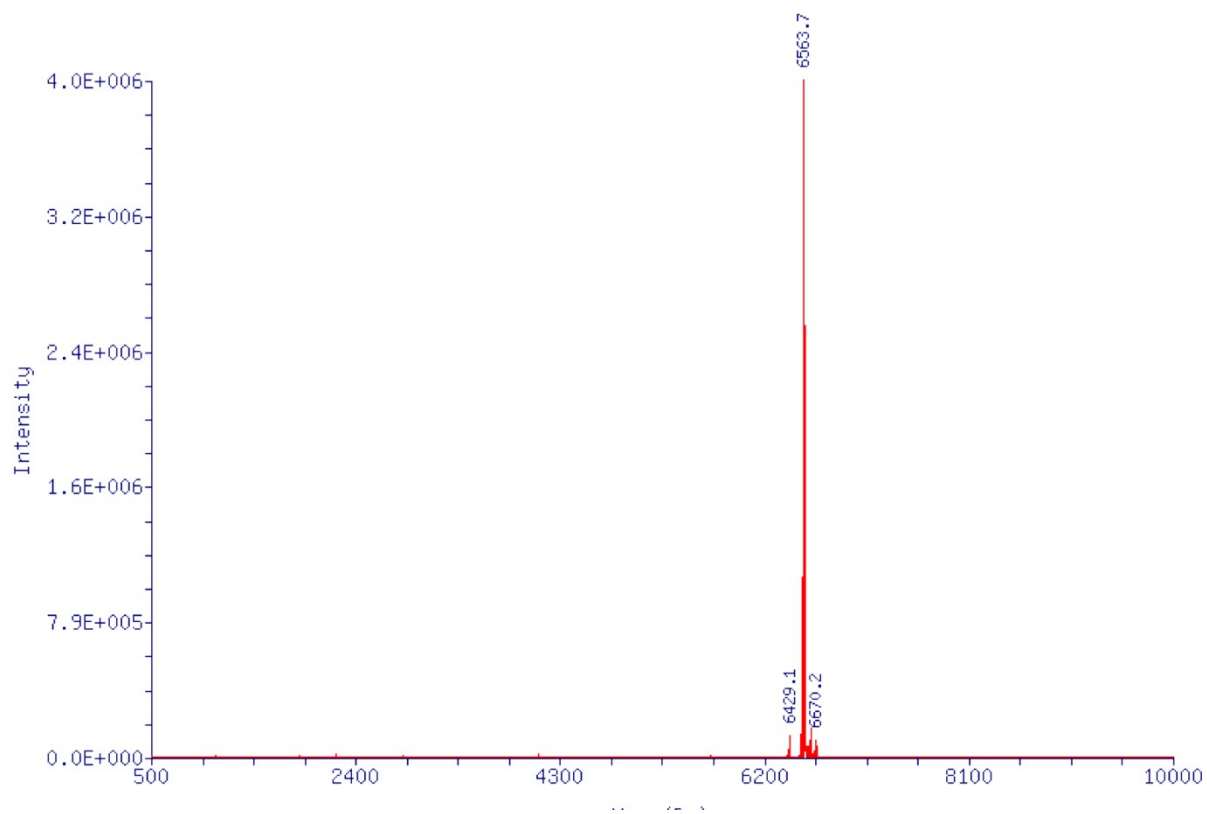

Mass chart of ON-6d (Q-Tof, Xevo G2-XS System, Waters)

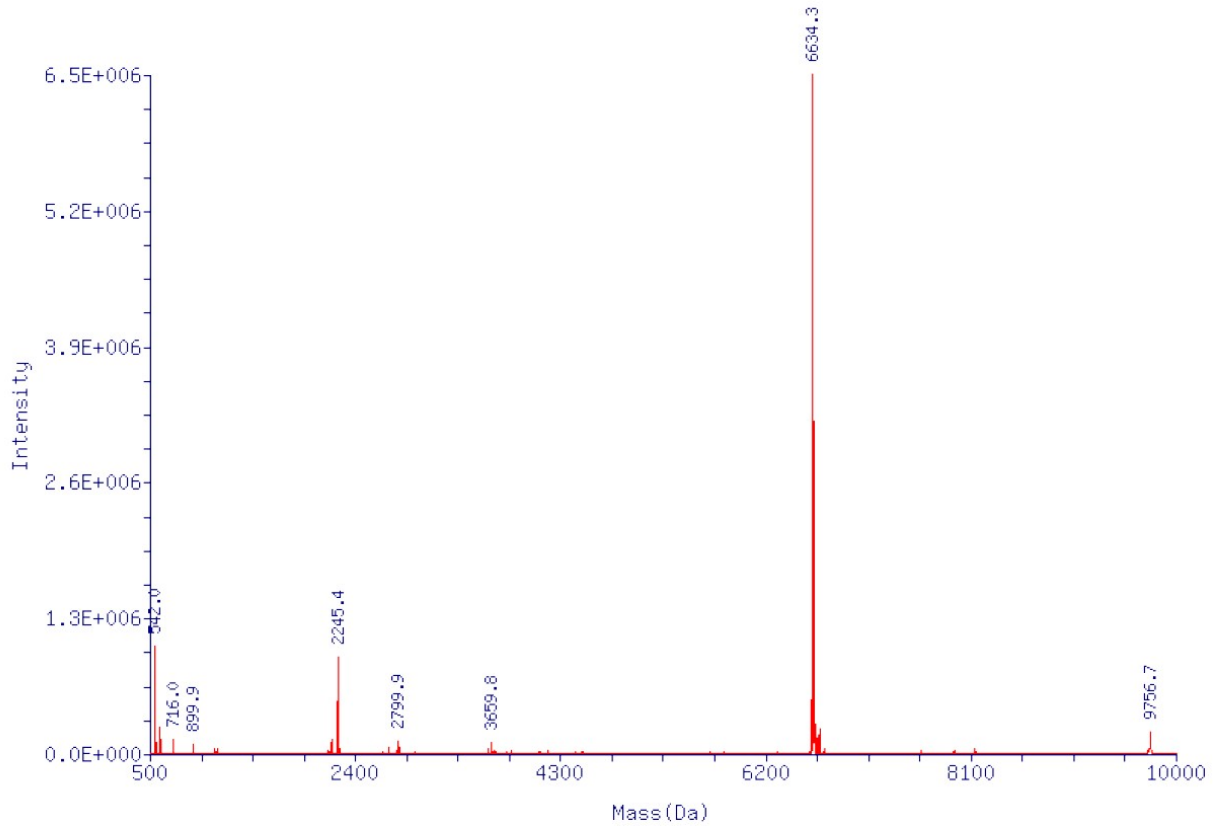

Mass chart of ON-6e (ESI, ZQ mass detector, Waters)

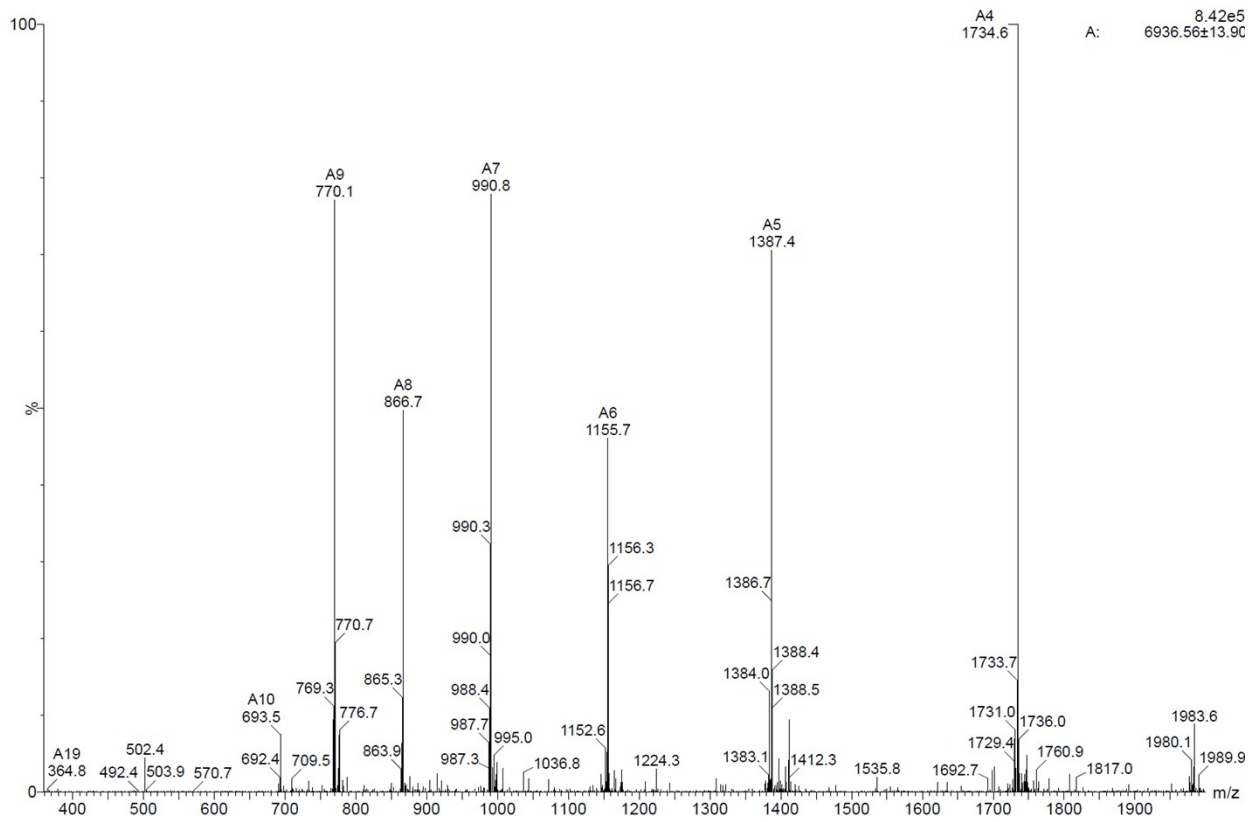

LCMS analysis condition

Waters ZQ mass detector (ESI)  
 Mobile phase A: 400 mM HFIP / 15mM TEA in water  
 Mobile phase B: Methanol  
 Flow rate: 0.2 mL/min  
 Gradient condition: 20-30 % in 2.5 min  
 Column: Waters XBridge™ BEH C18 1.7 μm (2.1 × 100 mm)  
 Column oven temperature: 60 °C  
 Detector: UV 260 nm

(a) T =ALNA[H], RT =5.33 min

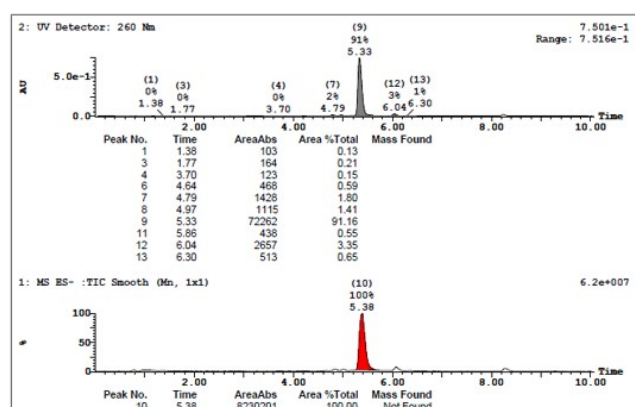

(b) T =ALNA[formyl], RT = 4.92 min

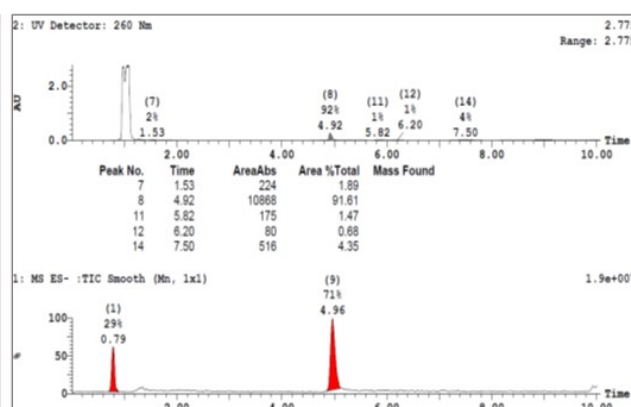

(c) T =ALNA[Ac], RT = 5.23 min

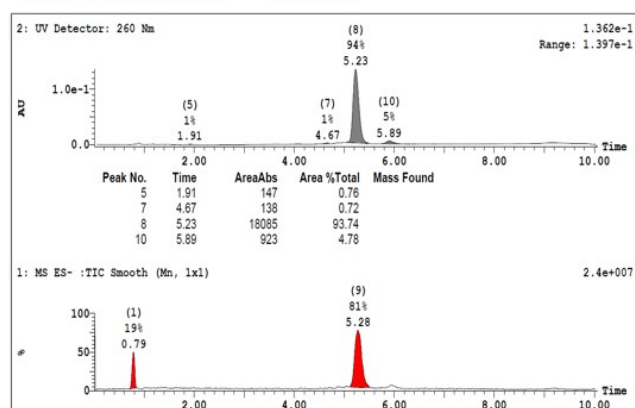

(d) T =ALNA[Bz], RT = 5.91 min

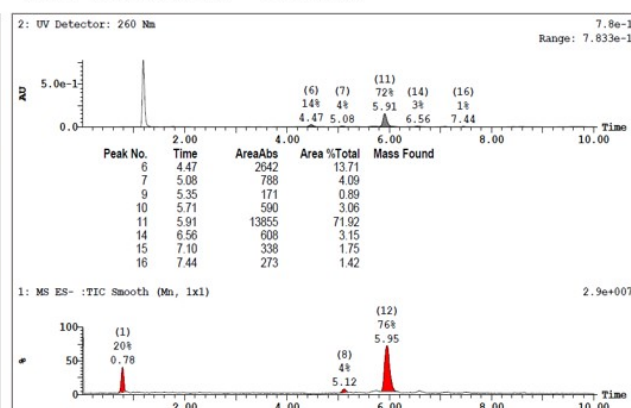

**Fig. S1 Examples of profiles of LC-MS analysis.** (a) LCMS analysis chart of **ON-1a** after solid-phase synthesis and HPLC purification (Sequence: 5' - GTGTTTTTTGCT -3', Capital letters = DNA, underline T = ALNA[H]). (b) LCMS chart of reaction mixture of formylation of **ON-1a** after 2 hours. (c) LCMS chart of reaction mixture of acetylation of **ON-1a** after 2 hours. (d) LCMS chart of reaction mixture of benzoylation of **ON-1a** after 2 hours. In all charts, the retention time (RT) around 0.78 min is the effect of injection or the peak of the reaction reagent. In reactions of **b-d**, the starting material **ON-1a** disappeared and converged to the target compounds. All the peaks were detected at 260 nm and ESI-MS (negative mode). We measured similar data on the PEM reaction of other oligonucleotides to confirm the progress of the reaction.



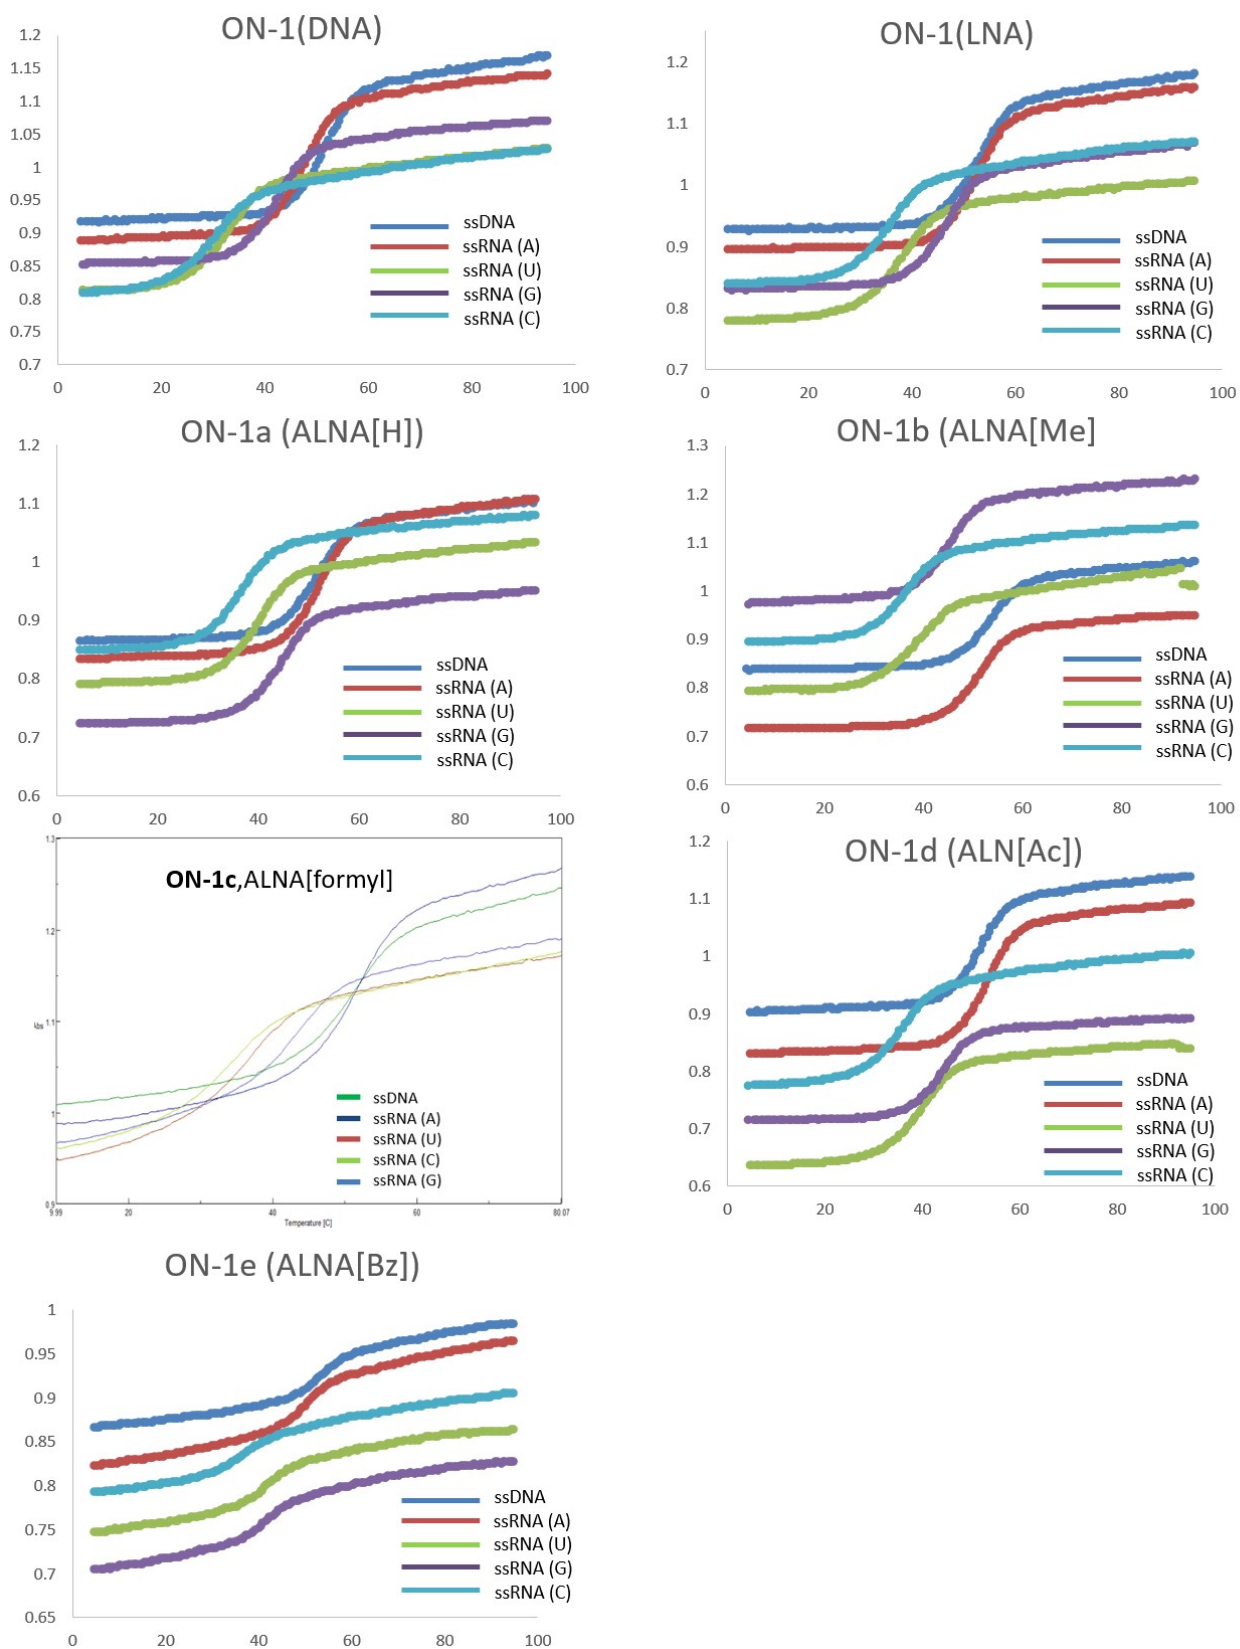

Fig. S2 Representative UV melting curves of ON-1.

**Table. S2**  $T_m$  values were calculated as the average of three independent experiments for each sequence.

| Seq No.      | Ct<br>( $\mu\text{mol/L}$ ) | $T_m$ [ $^{\circ}\text{C}$ ] toward ssRNA<br>5'-r(UAGCUUAUCAGACUGAUGUUGA)-3' | SD  | SEM |
|--------------|-----------------------------|------------------------------------------------------------------------------|-----|-----|
| <b>ON-3d</b> | 2                           | 65.8                                                                         | 0.1 | 0.0 |
| <b>ON-4d</b> | 2                           | 69.9                                                                         | 0.2 | 0.1 |
| <b>ON-5d</b> | 2                           | 73.0                                                                         | 0.3 | 0.2 |

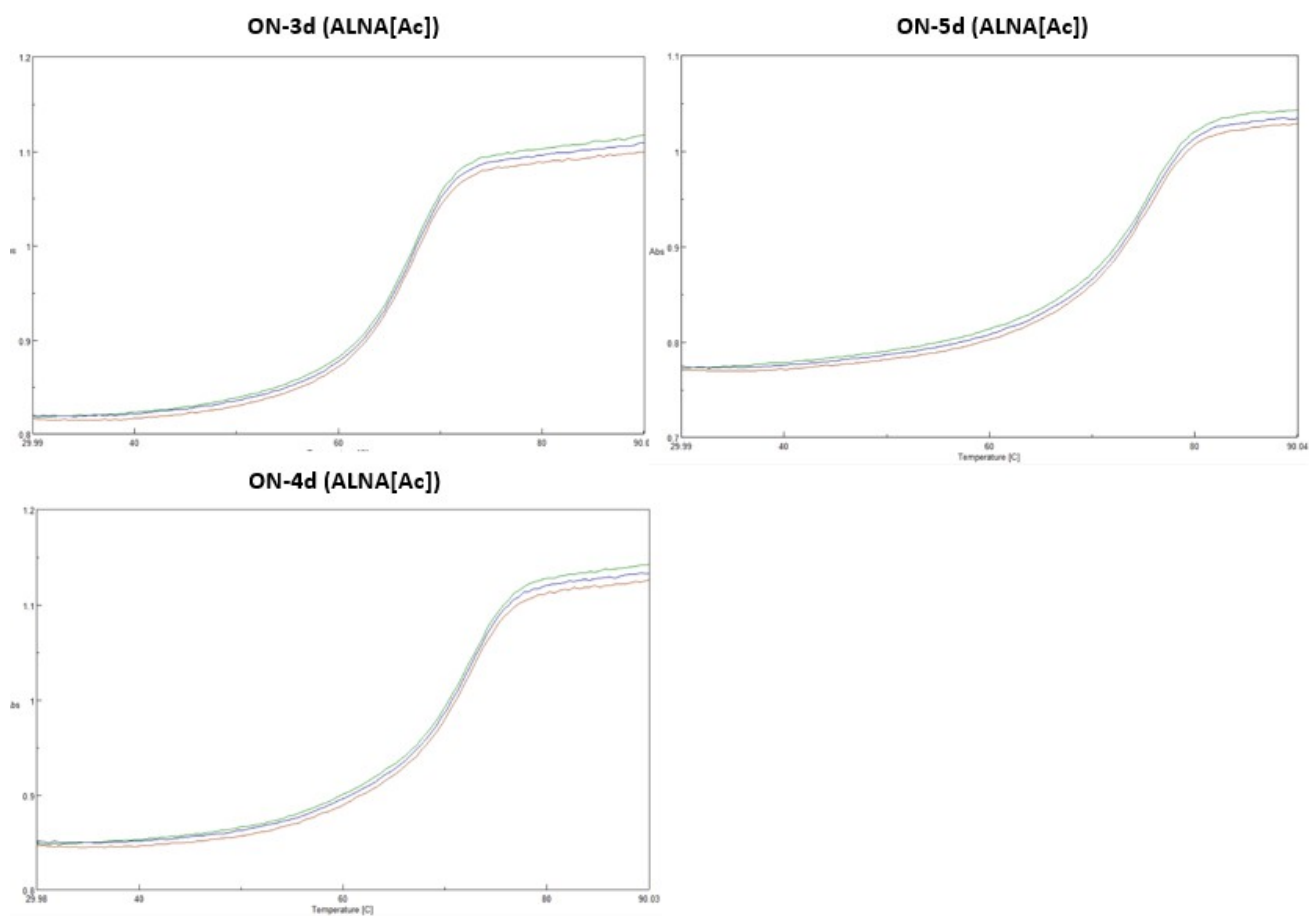

**Fig. S3** Representative UV melting curves of **ON-3d**, **ON-4d** and **ON-5d**
